# Supplementary material for: The sociotechnical barriers to the decarbonization of buildings
Source: Research Square preprint supplement (doi:10.21203/rs.3.rs-5926332/v1), 2025-03-09
Supplement: Supplementary file 1 [file cb8e248b6ee5cf1e13a9a5fa.xlsx]

## Sheet: Citations
Supplementary Information for: The sociotechnical barriers to the decarbonization of buildings Erin Heinz, Benjamin K. Sovacool, Thomas Kwan, and Vincent Petit
Citations Academic Corpus
Ababio, B., & Lu, W. (2023). Barriers and enablers of circular economy in construction: A multi-system perspective towards the development of a practical framework. CONSTRUCTION MANAGEMENT AND ECONOMICS, 41(1), 3–21. https://doi.org/10.1080/01446193.2022.2135750
Abdulai, S., Nani, G., Taiwo, R., Antwi-Afari, P., Zayed, T., & Sojobi, A. (2024). Modelling the relationship between circular economy barriers and drivers for sustainable construction industry. BUILDING AND ENVIRONMENT, 254. https://doi.org/10.1016/j.buildenv.2024.111388
Abdulsalam, R., Chan, M., Masrom, M., & Nawawi, A. (2024). Benefits and challenges of implementing green building development in Nigeria. BUILT ENVIRONMENT PROJECT AND ASSET MANAGEMENT, 14(3), 399–413. https://doi.org/10.1108/BEPAM-09-2022-0143
Abidin, N., & Powmya, A. (2024). Identifying barriers in constructing green buildings in Oman: A study on project contractors’ experience. BUILT ENVIRONMENT PROJECT AND ASSET MANAGEMENT. https://doi.org/10.1108/BEPAM-02-2024-0044
Abougamil, R., Thorpe, D., & Heravi, A. (2023). Investigating the Source of Claims with the Importance of BIM Application on Reducing Construction Disputable Claims in KSA. BUILDINGS, 13(9). https://doi.org/10.3390/buildings13092219
Abougamil, R., Thorpe, D., & Heravi, A. (2024). An Investigation of BIM Advantages in Analysing Claims Procedures Related to the Extension of Time and Money in the KSA Construction Industry. BUILDINGS, 14(2). https://doi.org/10.3390/buildings14020426
Abreu, M. I., Pereira, A., & Gervásio, H. (2023). From a Techno-Economic towards a Socio-Technical Approach—A Review of the Influences and Policies on Home Energy Renovations’ Decisions. Buildings, 13(3), 761. https://doi.org/10.3390/buildings13030761
Abuseif, M., Dupre, K., & Michael, R. (2022). Trees on buildings: Opportunities, challenges, and recommendations. BUILDING AND ENVIRONMENT, 225. https://doi.org/10.1016/j.buildenv.2022.109628
Addy, M., Adinyira, E., Danku, J., & Dadzoe, F. (2021). Impediments to the development of the green building market in sub-Saharan Africa: The case of Ghana. SMART AND SUSTAINABLE BUILT ENVIRONMENT, 10(2), 193–207. https://doi.org/10.1108/SASBE-12-2019-0170
Adekunye, O., & Oke, A. (2024). Challenges to the adoption of biomimicry as a sustainable approach in the nigerian construction industry. INTELLIGENT BUILDINGS INTERNATIONAL. https://doi.org/10.1080/17508975.2024.2370374
Adetooto, J., & Windapo, A. (2022). Concomitant Impediments to the Social Acceptance of Sandbag Technology for Sustainable and Affordable Housing Delivery: The Case of South Africa. BUILDINGS, 12(6). https://doi.org/10.3390/buildings12060859
Adhi, A., & Muslim, F. (2023). Development of Stakeholder Engagement Strategies to Improve Sustainable Construction Implementation Based on Lean Construction Principles in Indonesia. SUSTAINABILITY, 15(7). https://doi.org/10.3390/su15076053
Affonso, E., Branco, R., Menezes, O., Guedes, A., Chinelli, C., Haddad, A., & Soares, C. (2024). The Main Barriers Limiting the Development of Smart Buildings. BUILDINGS, 14(6). https://doi.org/10.3390/buildings14061726
Agapiou, A. (2022). Barriers to Offsite Construction Adoption: A Quantitative Study among Housing Associations in England. BUILDINGS, 12(3). https://doi.org/10.3390/buildings12030283
Aghimien, D., Aigbavboa, C., Aghimien, L., Thwala, W. D., & Ndlovu, L. (2020). Making a case for 3D printing for housing delivery in South Africa. International Journal of Housing Markets and Analysis, 13(4), 565–581. https://doi.org/10.1108/IJHMA-11-2019-0111
Aghimien, D., Oke, A., & Aigbavboa, C. (2019). Barriers of Building Maintenance in Private Tertiary Institutions in Nigeria (WOS:000559112200030). 788, 312–323. https://doi.org/10.1007/978-3-319-94199-8_30
Agyekum, K., Adinyira, E., Baiden, B., Ampratwum, G., & Duah, D. (2019). Barriers to the adoption of green certification of buildings A thematic analysis of verbatim comments from built environment professionals. JOURNAL OF ENGINEERING DESIGN AND TECHNOLOGY, 17(5), 1035–1055. https://doi.org/10.1108/JEDT-01-2019-0028
Agyekum, K., Opoku, A., Oppon, A., & Opoku, D. (2022). Obstacles to green building project financing: An empirical study in Ghana. INTERNATIONAL JOURNAL OF CONSTRUCTION MANAGEMENT, 22(15), 2922–2930. https://doi.org/10.1080/15623599.2020.1832182
Ahmad Huzaimi Abd Jamil & Mohamad Syazli Fathi. (2019). Contractual issues for Building Information Modelling (BIM)-based construction projects: An exploratory case study. IOP Conference Series. Materials Science and Engineering, 513(1). https://doi.org/10.1088/1757-899X/513/1/012035
Ahmed, A., Ge, T., Peng, J., Yan, W., Tee, B., & You, S. (2022). Assessment of the renewable energy generation towards net-zero energy buildings: A review. ENERGY AND BUILDINGS, 256. https://doi.org/10.1016/j.enbuild.2021.111755
Ahmed, S., & Sobuz, M. (2020). Challenges of implementing lean construction in the construction industry in Bangladesh. SMART AND SUSTAINABLE BUILT ENVIRONMENT, 9(2), 174–207. https://doi.org/10.1108/SASBE-02-2019-0018
Ahmed, S., Hossain, M., & Haq, I. (2021). Implementation of lean construction in the construction industry in Bangladesh: Awareness, benefits and challenges. INTERNATIONAL JOURNAL OF BUILDING PATHOLOGY AND ADAPTATION, 39(2), 368–406. https://doi.org/10.1108/IJBPA-04-2019-0037
Aiello, S. (2010). ADDRESSING FINANCIAL OBJECTIONS TO SUSTAINABLE DESIGN AND CONSTRUCTION. JOURNAL OF GREEN BUILDING, 5(4), 67–77. https://doi.org/10.3992/jgb.5.4.67
Akhatova, A., Kranzl, L., Schipfer, F., & Heendeniya, C. B. (2022). Agent-Based Modelling of Urban District Energy System Decarbonisation—A Systematic Literature Review. Energies, 15(2), 554. https://doi.org/10.3390/en15020554
Akinradewo, O., Aigbavboa, C., & Ngwenya, L. (2019). Overcoming the challenges encountered by construction industry SMEs in using insurance. IOP Conference Series. Materials Science and Engineering, 640(1). https://doi.org/10.1088/1757-899X/640/1/012027
Alakhali, A. K., Baarimah, A. O., Alkhadri, A. H., Gabir, A. A., Hasan, K., & Aawag Mohsen Alawag. (2024). Unlocking the Potential of BIM for Transformation in the Kenyan Construction Industry. The Institute of Electrical and Electronics Engineers, Inc. (IEEE) Conference Proceedings. https://doi.org/10.1109/ICETSIS61505.2024.10459431
Alaux, N., Truger, B., Hoxha, E., M Ruschi Mendes Saade, & Passer, A. (2022). Greenhouse gas reduction strategies for building materials: A reality check with the climate targets. IOP Conference Series. Earth and Environmental Science, 1078(1), 012050. https://doi.org/10.1088/1755-1315/1078/1/012050
Al-Awag, A. M., Alaloul, W. S., Liew, M. S., Baarimah, A. O., & Musarat Muhammad Ali. (2023). The potential role of industrialized building systems (IBS) in Malaysian sustainable construction: Awareness and barriers. AIP Conference Proceedings, 2608(1). https://doi.org/10.1063/5.0128035
Albeaino, G., & Gheisari, M. (2021). TRENDS, BENEFITS, AND BARRIERS OF UNMANNED AERIAL SYSTEMS IN THE CONSTRUCTION INDUSTRY: A SURVEY STUDY IN THE UNITED STATES. JOURNAL OF INFORMATION TECHNOLOGY IN CONSTRUCTION, 26, 84–111. https://doi.org/10.36680/j.itcon.2021.006
Alex Gonzalez Caceres. (2018). Shortcomings and Suggestions to the EPC Recommendation List of Measures: In-Depth Interviews in Six Countries. Energies, 11(10), n/a. https://doi.org/10.3390/en11102516
Alfaiz, S., Abd Karim, S., & Alashwal, A. (2021). Critical Success Factors of Green Building Retrofitting Ventures in Iraq. INTERNATIONAL JOURNAL OF SUSTAINABLE CONSTRUCTION ENGINEERING AND TECHNOLOGY, 12(1). https://doi.org/10.30880/ijscet.2021.12.01.002
Alghamdi, M. S., Beach, T. H., & Rezgui, Y. (2022). Reviewing the effects of deploying building information modelling (BIM) on the adoption of sustainable design in Gulf countries: A case study in Saudi Arabia. City, Territory and Architecture, 9(1). https://doi.org/10.1186/s40410-022-00160-7
Alhammadi, Y., Kineber, A., & Alhusban, M. (2024). Investigating Barriers to the Adoption of Energy Management Practices for Sustainable Construction Projects: SEM and ANN Approaches. CIVIL ENGINEERING JOURNAL-TEHRAN, 10(4), 1232–1253. https://doi.org/10.28991/CEJ-2024-010-04-015
Alhumayn, S., Chinyio, E., & Ndekugri, I. (2017). THE BARRIERS AND STRATEGIES OF IMPLEMENTING BIM IN SAUDI ARABIA (WOS:000576963300006). 169, 55–67. https://doi.org/10.2495/BIM170061
Ali, A. (2018). Development of a framework for sustainable construction waste management: A case study of three major Libyan cities. PQDT - UK & Ireland. https://ezproxy.bu.edu/login?qurl=https://www.proquest.com/docview/2341404735?accountid=9676&bdid=81940&_bd=8nhaLNoSRG9HH3k46m33MtOX%2FC0%3D
Alite, M., Abu-Omar, H., Agurcia, M. T., Jácome, M., Kenney, J., Tapia, A., & Siebel, M. (2023). Construction and demolition waste management in Kosovo: a survey of challenges and opportunities on the road to circular economy. Journal of Material Cycles and Waste Management, 25(2), 1191-1203.
Aliu, J., Oke, A., Odia, O., Akanni, P., Leo-Olagbaye, F., & Aigbavboa, C. (2024). Exploring the barriers to the adoption of environmental economic practices in the construction industry. MANAGEMENT OF ENVIRONMENTAL QUALITY. https://doi.org/10.1108/MEQ-01-2024-0053
Allen, S., Moorman, C., Peterson, M., Hess, G., & Moore, S. (2012). Overcoming socio-economic barriers to conservation subdivisions: A case-study of four successful communities. LANDSCAPE AND URBAN PLANNING, 106(3), 244–252. https://doi.org/10.1016/j.landurbplan.2012.03.012
Allwood, J., Ashby, M., Gutowski, T., & Worrell, E. (2011). Material efficiency: A white paper. RESOURCES CONSERVATION AND RECYCLING, 55(3), 362–381. https://doi.org/10.1016/j.resconrec.2010.11.002
Al-Otaibi, A., Bowan, P., Daiem, M., Said, N., Ebohon, J., Alabdullatief, A., Al-Enazi, E., & Watts, G. (2022). Identifying the Barriers to Sustainable Management of Construction and Demolition Waste in Developed and Developing Countries. SUSTAINABILITY, 14(13). https://doi.org/10.3390/su14137532
Alqahtani, F., Alsanad, A., Alsadan, A., Sherif, M., & Mohamed, A. (2022). Scrutinizing the Adoption of Integrated Project Delivery in the Kingdom of Saudi Arabia Construction Sector. BUILDINGS, 12(12). https://doi.org/10.3390/buildings12122144
Alsaeedi, F., Lafta, M. J., & Ahmed, A. (2020). State of Building Information Modelling (BIM) adoption in Iraq. IOP Conference Series. Materials Science and Engineering, 737(1). https://doi.org/10.1088/1757-899X/737/1/012007
AlSanad, S. (2015). Awareness, Drivers, Actions, and Barriers of Sustainable Construction in Kuwait (WOS:000380430700112). 118, 969–983. https://doi.org/10.1016/j.proeng.2015.08.538
Altarawneh, N., & Murtadha, T. (2023). Managing engineering challenges in the design and implementation of eco-friendly residential structures. RESULTS IN ENGINEERING, 19. https://doi.org/10.1016/j.rineng.2023.101363
Altassan, A., Othman, M., Elbeltagi, E., Abdelshakor, M., & Ehab, A. (2023). A Qualitative Investigation of the Obstacles Inherent in the Implementation of Building Information Modeling (BIM). BUILDINGS, 13(3). https://doi.org/10.3390/buildings13030700
Alwashah, Z., Sweis, G., Abu Hajar, H., Abu-Khader, W., & Sweis, R. (2024). Challenges to adopt digital construction technologies in the Jordanian construction industry. CONSTRUCTION INNOVATION-ENGLAND. https://doi.org/10.1108/CI-03-2023-0056
Al-Yami, A., & Sanni-Anibire, M. O. (2021). BIM in the Saudi Arabian construction industry: State of the art, benefit and barriers. International Journal of Building Pathology and Adaptation, 39(1), 33–47. https://doi.org/10.1108/IJBPA-08-2018-0065
Amade, B., Moneke, U., & Okorie, C. (2024). Modelling the Hindrances to Building Information Modelling Adoption on Construction Projects in Nigeria. JOURNAL OF CONSTRUCTION IN DEVELOPING COUNTRIES, 29(1), 23–46. https://doi.org/10.21315/jcdc-11-21-0188
Ambekar, S., Roy, D., Hiray, A., Prakash, A., & Patyal, V. (2022). Barriers to adoption of reverse logistics: A case of construction, real estate, infrastructure and project (CRIP) sectors. ENGINEERING CONSTRUCTION AND ARCHITECTURAL MANAGEMENT, 29(7), 2878–2902. https://doi.org/10.1108/ECAM-02-2021-0112
Amecke, H. (2012). The impact of energy performance certificates: A survey of German home owners. Energy Policy, 46, 4. https://doi.org/10.1016/j.enpol.2012.01.064
Ameh, J., Soyingbe, A., & Oyediran, O. (2019). ACCEPTABILITY AND USE OF INNOVATIVE BAMBOO PRODUCTS FOR THE CONSTRUCTION OF RESIDENTIAL BUILDINGS IN NIGERIA. INTERNATIONAL JOURNAL OF TECHNOLOGY, 10(4), 648–656. https://doi.org/10.14716/ijtech.v10i4.2574
Ameli, N., & Kammen, D. (2012). Clean energy deployment: Addressing financing cost. ENVIRONMENTAL RESEARCH LETTERS, 7(3). https://doi.org/10.1088/1748-9326/7/3/034008
Ametepey, O., Aigbavboa, C., & Ansah, K. (2015). Barriers to successful implementation of sustainable construction in the Ghanaian construction industry (WOS:000383740301106). 3, 1682–1689. https://doi.org/10.1016/j.promfg.2015.07.988
Ammar, A., Nassereddine, H., AbdulBaky, N., AbouKansour, A., Tannoury, J., Urban, H., & Schranz, C. (2022). Digital Twins in the Construction Industry: A Perspective of Practitioners and Building Authority. FRONTIERS IN BUILT ENVIRONMENT, 8. https://doi.org/10.3389/fbuil.2022.834671
Amoruso, G., Donevska, N., & Skomedal, G. (2018). German and Norwegian policy approach to residential buildings’ energy efficiency-a comparative assessment. ENERGY EFFICIENCY, 11(6), 1375–1395. https://doi.org/10.1007/s12053-018-9637-5
Ampatzidis, P., Bowyer, E., Coley, D., & Stephenson, V. (2023). Decarbonising at scale: Extracting strategic thinking from EPC and deprivation data. BUILDING SERVICES ENGINEERING RESEARCH & TECHNOLOGY, 44(6), 625–639. https://doi.org/10.1177/01436244231203193
Ana Mafalda Matos, João M P Q Delgado, & Guimarães, A. S. (2022). Linking Energy Poverty with Thermal Building Regulations and Energy Efficiency Policies in Portugal. Energies, 15(1), 329. https://doi.org/10.3390/en15010329
Anand, J., PhD, Liu, X., PhD, Wang, L., PhD, & Malhotra, M., PhD. (2024). An Assessment of Existing Barriers to Market Adoption of Thermal Energy Storage in Buildings Based on Interviews with Stakeholders. ASHRAE Transactions, 130, 52–61.
Anand, V., Kadiri, V. L., & Putcha, C. (2023). Passive buildings: A state-of-the-art review. Journal of Infrastructure Preservation and Resilience, 4(1), 3. https://doi.org/10.1186/s43065-022-00068-z
Anastasiades Kostas, Joos, D., van den Berg Marc, Rinke, M., Blom, J., & Audenaert Amaryllis. (2023). Stakeholder perceptions on implementing design for disassembly and standardisation for heterogeneous construction components. Waste Management & Research, 41(8), 1372–1381. https://doi.org/10.1177/0734242X231154140
Andrade, I., Land, J., Gallardo, P., & Krumdieck, S. (2022). Application of the InTIME Methodology for the Transition of Office Buildings to Low Carbon—A Case Study. Sustainability, 14(19), 12053. https://doi.org/10.3390/su141912053
Anesi, J. (2016). HVAC’s Role in Net-zero Buildings. Air Conditioning, Heating & Refrigeration News, 258(13), 12.
Anne Sigrid Nordby. (2019). Barriers and opportunities to reuse of building materials in the Norwegian construction sector. IOP Conference Series. Earth and Environmental Science, 225(1). https://doi.org/10.1088/1755-1315/225/1/012061
Anonymous. (2012). Training for the Future: Arming Subcontractors With Advanced Tools Through Performance Simulation. Energy Design Update, 32(10), 6.
Anonymous. (2014). Net-Zero Feasible in D.C. Buildings, 108(6), 22.
Anonymous. (2023). RMI, USGBC audit concrete and steel in “Action on Embodied Carbon.” Concrete Products, 76(11), 24–24.
Anonymous. (2023b). Industry body reacts to new government net zero leadership. H & V News, 5–5.
Antai, I., Lenka, S., & Achtenhagen, L. (2024). Digital platforms and the construction supply chain: Trends and emerging themes in extant AEC research. CONSTRUCTION MANAGEMENT AND ECONOMICS. https://doi.org/10.1080/01446193.2024.2396592
Antonopoulos, C. A., Fuentes, T. L., McCord, K. H., Rackley, A. L. S., & Biswas, S. (2024). Regional assessment of household energy decision-making and technology adoption in the United States. Energy Policy, 185, 113940. https://doi.org/10.1016/j.enpol.2023.113940
Anzagira, L., Duah, D., Badu, E., Simpeh, E., & Marful, A. (2024). Stimulation strategies to promote green building uptake in developing countries: The case of Ghana. JOURNAL OF ENGINEERING DESIGN AND TECHNOLOGY, 22(3), 1012–1029. https://doi.org/10.1108/JEDT-12-2021-0719
Aranda, J., Tsitsanis, T., Georgopoulos, G., & Longares, J. M. (2023). Innovative Data-Driven Energy Services and Business Models in the Domestic Building Sector. Sustainability, 15(4), 3742. https://doi.org/10.3390/su15043742
Araya, R., Guillaumet, A., do Valle, A., Duque, M., Gonzalez, G., Cabrero, J., De Leon, E., Castro, F., Gutierrez, C., Negrao, J., Moya, L., & Guindos, P. (2022). Development of Sustainable Timber Construction in Ibero-America: State of the Art in the Region and Identification of Current International Gaps in the Construction Industry. SUSTAINABILITY, 14(3). https://doi.org/10.3390/su14031170
Arayici, Y., Coates, P., Koskela, L., Kagioglou, M., Usher, C., & O’Reilly, K. (2011). Technology adoption in the BIM implementation for lean architectural practice. Automation in Construction, 20(2), 189–195. https://doi.org/10.1016/j.autcon.2010.09.016
Arbulu, M., Oregi, X., Etxepare, L., & Hernandez-Minguillon, R. (2022). Barriers and challenges of the assessment framework of the Commission Recommendation (EU) 2019/786 on building renovation by European RTD projects. ENERGY AND BUILDINGS, 269. https://doi.org/10.1016/j.enbuild.2022.112267
Arent, D., Green, P., Abdullah, Z., Barnes, T., Bauer, S., Bernstein, A., Berry, D., Berry, J., Burrell, T., Carpenter, B., Cochran, J., Cortright, R., Curry-Nkansah, M., Denholm, P., Gevorian, V., Himmel, M., Livingood, B., Keyser, M., King, J., … Turchi, C. (2022). Challenges and opportunities in decarbonizing the US energy system. RENEWABLE & SUSTAINABLE ENERGY REVIEWS, 169. https://doi.org/10…
Armistead, S., & Babaahmadi, A. (2024). Navigating regulatory challenges, technical performance and circular economy integration of mineral-based waste materials for sustainable construction: A mini review in the European context. WASTE MANAGEMENT & RESEARCH. https://doi.org/10.1177/0734242X241270973
Armstrong, A., Wright, C., Ashe, B., & Nielsen, H. (2017). Enabling innovation in building sustainability: Australia’s National Construction Code (WOS:000404873600033). 180, 320–330. https://doi.org/10.1016/j.proeng.2017.04.191
Arogundade, S., Dulaimi, M., & Ajayi, S. (2024). Exploring the challenges impeding construction process carbon reduction in the UK. INTERNATIONAL JOURNAL OF CONSTRUCTION MANAGEMENT, 24(4), 422–431. https://doi.org/10.1080/15623599.2023.2257512
Arowolo, W., & Perez, Y. (2023). Rapid decarbonisation of Paris, Lyon and Marseille’s power, transport and building sectors by coupling rooftop solar PV and electric vehicles. ENERGY FOR SUSTAINABLE DEVELOPMENT, 74, 196–214. https://doi.org/10.1016/j.esd.2023.04.002
Arzoyan, S. (2019). Endogenous energy efficiency improvements in large-scale retrofits to Swiss residential building stock (WOS:000561852800174). 1343. https://doi.org/10.1088/1742-6596/1343/1/012174
Asgarzadeh, M., Koga, T., Yoshizawa, N., Munakata, J., & Hirate, K. (2010). Investigating Green Urbanism; Building Oppressiveness. JOURNAL OF ASIAN ARCHITECTURE AND BUILDING ENGINEERING, 9(2), 555–562. https://doi.org/10.3130/jaabe.9.555
ASHRAE, Edelson, J., Cheslak, K., Miller, A., & Lyles, M. (2022). Expanding the Role of Energy Codes to Meet Generational Shifts (WOS:001057523300015). 128, 129–136.
ASHRAE, Heizer, M., & Shelide, B. (2020). Challenges to Statewide Net-Zero Energy Buildings: The Oregon Experience (WOS:000784116000008). 126, 29–37.
Assaad, R. (2024). Examining Low-Carbon Material Initiatives: Existing Policies, Impacts on the Procurement of Projects, Current Challenges, and Potential Solutions to Reduce Embodied Carbon in the Construction Industry. JOURNAL OF LEGAL AFFAIRS AND DISPUTE RESOLUTION IN ENGINEERING AND CONSTRUCTION, 16(2). https://doi.org/10.1061/JLADAH.LADR-1101
Assadiki, R., Merlin, G., Boileau, H., Buhé, C., & Belmir, F. (2022). Status and Prospects of Green Building in the Middle East and North Africa (MENA) Region with a Focus on the Moroccan Context. SUSTAINABILITY, 14(19). https://doi.org/10.3390/su141912594
Assessing Progress in Decarbonizing Spain’s Building Stock; Indicators and Data Availability. (2024). Assessing Progress in Decarbonizing Spain’s Building Stock. https://ezproxy.bu.edu/login?qurl=https://www.proquest.com/docview/3067835457?accountid=9676&bdid=77468&_bd=e%2FB%2FD4RsUYXAb65CwcIHfRuwgAM%3D
Assessment of technical and economical viability for large-scale conversion of single family residential buildings into zero energy buildings in Brazil: Climatic and cultural considerations. (n.d.). 63.
Astmarsson, B., Jensen, P. A., & Maslesa, E. (2013). Sustainable renovation of residential buildings and the landlord/tenant dilemma. Energy Policy, 63, 355–362.
Astudillo, M., Vaillancourt, K., Pineau, P., & Amor, B. (2017). Can the household sector reduce global warming mitigation costs? Sensitivity to key parameters in a TIMES techno-economic energy model. APPLIED ENERGY, 205, 486–498. https://doi.org/10.1016/j.apenergy.2017.07.130
Atmoko, D., Susilawati, C., & Goonetilleke, A. (2019). Improving Sustainability of Indonesian Public Building: Challenges and Policy Strategy (WOS:000770798200027). 131, 268–276. https://doi.org/10.1007/978-3-030-04293-6_27
Attoye, D. E., Kheira Anissa Tabet Aoul, & Hassan, A. (2022). Mandatory Policy, Innovations and the Renewable Energy Debate: A Case Study on Building Integrated Photovoltaics. Buildings, 12(7), 931. https://doi.org/10.3390/buildings12070931
Awareness of BIM adoption in Brunei. (2017). AIP Conference Proceedings, 1887(1). https://doi.org/10.1063/1.5003515
Aydin, Y., Mirzaei, P., & Akhavannasab, S. (2019). On the relationship between building energy efficiency, aesthetic features and marketability: Toward a novel policy for energy demand reduction. ENERGY POLICY, 128, 593–606. https://doi.org/10.1016/j.enpol.2018.12.036
Azar, E., Alaifan, B., Lin, M., Trepci, E., & El Asmar, M. (2021). Drivers of energy consumption in Kuwaiti buildings: Insights from a hybrid statistical and building performance simulation approach. Energy Policy, 150, 1. https://doi.org/10.1016/j.enpol.2021.112154
Azcarate-Aguerre, J. F., Conci, M., Zils, M., Hopkinson, P., & Klein, T. (2022). Building energy retrofit-as-a-service: A Total Value of Ownership assessment methodology to support whole life-cycle building circularity and decarbonisation. Construction Management and Economics, 40(9), 676–689. https://doi.org/10.1080/01446193.2022.2094434
Azeem, S., Naeem, M., & Waheed, A. (2020). Adoption of Green Building Practices in Pakistan: Barriers and Measures. In GREEN BUILDING IN DEVELOPING COUNTRIES: POLICY, STRATEGY AND TECHNOLOGY (WOS:000489143800013; pp. 199–215). https://doi.org/10.1007/978-3-030-24650-1_1110.1007/978-3-030-24650-1
Azharuddin, M. (2019). Integrated Carbon Emission Management for the United Arab Emirates Construction Industry. PQDT - UK & Ireland. https://ezproxy.bu.edu/login?qurl=https://www.proquest.com/docview/2579453311?accountid=9676&bdid=81940&_bd=GMM3ofvv4X%2BOu8KTDuqIkeJaLZY%3D
Babatunde, S., Udeaja, C., & Adekunle, A. (2021). Barriers to BIM implementation and ways forward to improve its adoption in the Nigerian AEC firms. INTERNATIONAL JOURNAL OF BUILDING PATHOLOGY AND ADAPTATION, 39(1), 48–71. https://doi.org/10.1108/IJBPA-05-2019-0047
Badiu, C., Barbuta-Misu, N., Chirita, M., Soare, I., Zlati, M., Fortea, C., & Antohi, V. (2024). Modelling the Impact of VAT Fiscality on Branch-Level Performance in the Construction Industry-Evidence from Romania. ECONOMIES, 12(2). https://doi.org/10.3390/economies12020030
Bahadorestani, A., Naderpajouh, N., & Sadiq, R. (2020). Planning for sustainable stakeholder engagement based on the assessment of conflicting interests in projects. JOURNAL OF CLEANER PRODUCTION, 242. https://doi.org/10.1016/j.jclepro.2019.118402
Bahidrah, S., & Korkmaz, K. A. (2017). Barriers to the implementation of the 2030 Saudi Visions Sustainable Construction Objectives. Middle East Journal of Entrepreneurship, Leadership & Sustainable Development, 1(1), 33.
Balon, V., Bagul, A., & Kumar, R. (2024). Green Construction Supply Chain Barriers Assessment: Evidence from Indian Construction Industry. GLOBAL BUSINESS REVIEW. https://doi.org/10.1177/09721509241231107
Bao, Z., Lee, W. M., & Lu, W. (2020). Implementing on-site construction waste recycling in Hong Kong: Barriers and facilitators. Science of the Total Environment, 747, 141091.
Barbero, I., Rezgui, Y., & Petri, I. (2023). A European-wide exploratory study to analyse the relationship between training and energy efficiency in the construction sector. Environment Systems & Decisions, 43(3), 337–357. https://doi.org/10.1007/s10669-022-09891-x
Barut, T., & Selçuk, S. (2024). Holistic Approach to Niche Formation: A Case on Transition to Nearly Zero-Energy Buildings in Türkiye. BUILDINGS, 14(6). https://doi.org/10.3390/buildings14061565
Bashir, H., Al-Hawarneh, A., Haridy, S., Shamsuzzaman, M., & Aydin, R. (2024). Barriers to Implementing Environmental Sustainability in UAE Construction Project Management: Identification and Comparison of ISO 14001-Certified and Non-Certified Firms. SUSTAINABILITY, 16(16). https://doi.org/10.3390/su16166779
Beach, T. H., Hippolyte, J.-L., & Rezgui, Y. (2020). Towards the adoption of automated regulatory compliance checking in the built environment. Automation in Construction, 118, 1. https://doi.org/10.1016/j.autcon.2020.103285
Beach, T., Rezgui, Y., Li, H., & Kasim, T. (2015). A rule-based semantic approach for automated regulatory compliance in the construction sector. Expert Systems with Applications, 42(12), 5219–5231. https://doi.org/10.1016/j.eswa.2015.02.029
Belaid, F., & Massié, C. (2022). What are the salient factors determining the usage of heating energy sources in France? Evidence from a discrete choice model. ENERGY AND BUILDINGS, 273. https://doi.org/10.1016/j.enbuild.2022.112386
Belaïd, F., & Massié, C. (2023). Driving forward a low-carbon built environment: The impact of energy context and environmental concerns on building renovation. Energy Economics, 124, 106865.
Belay, S., Goedert, J., Woldesenbet, A., & Rokooei, S. (2021). Enhancing BIM implementation in the Ethiopian public construction sector: An empirical study. COGENT ENGINEERING, 8(1). https://doi.org/10.1080/23311916.2021.1886476
Bennett-Ness, J., & Nerval, C. (2023). Net zero target “will be missed.” Property Week, 1–1.
Bertelsen, N., & Vad Mathiesen, B. (2020). EU-28 Residential Heat Supply and Consumption: Historical Development and Status. ENERGIES, 13(8). https://doi.org/10.3390/en13081894
Bertoldi, P., Economidou, M., Palermo, V., Benigna Boza‐Kiss, & Todeschi, V. (2021). How to finance energy renovation of residential buildings: Review of current and emerging financing instruments in the EU. Wiley Interdisciplinary Reviews, 10(1), e384. https://doi.org/10.1002/wene.384
Bertolini, M. (2022). Energy Efficiency in Urban Context: An Overview of European-Funded Projects with the Analysis of an ELENA Case Study. SUSTAINABILITY, 14(17). https://doi.org/10.3390/su141710574
Biere-Arenas, R., Spairani-Berrio, S., Spairani-Berrio, Y., & Marmolejo-Duarte, C. (2021). One-Stop-Shops for Energy Renovation of Dwellings in Europe—Approach to the Factors That Determine Success and Future Lines of Action. Sustainability, 13(22), 12729. https://doi.org/10.3390/su132212729
Bijivemula, S., Sai, S., & Chepuri, A. (2024). A structural equation model of stakeholder roles in the implementation of green construction strategies in the Indian construction industry. INTERNATIONAL JOURNAL OF CONSTRUCTION MANAGEMENT, 24(5), 486–494. https://doi.org/10.1080/15623599.2023.2179568
Bilge Gokhan Celik, Abraham, Y. S., & Attaran, M. (2024). Unlocking Blockchain in Construction: A Systematic Review of Applications and Barriers. Buildings, 14(6), 1600. https://doi.org/10.3390/buildings14061600
Biskupski, R., Bolin, G., Nauclér, T., Sjödin, E., Smeets, B., & Spranzi, P. (2023). Refurbishing Europe: Igniting opportunities in the built environment. McKinsey Insights, n/a.
Björklund, M., von Malmborg, F., & Nordensvärd, J. (2023). Lessons learnt from 20+years of research on multilevel governance of energy-efficient and zero-carbon buildings in the European Union. ENERGY EFFICIENCY, 16(8). https://doi.org/10.1007/s12053-023-10178-6
Blomqvist, S., Glad, W., & Rohdin, P. (2022). Ten years of energy efficiency-Exploring the progress of barriers and drivers in the swedish residential and services sector. ENERGY REPORTS, 8, 14726–14740. https://doi.org/10.1016/j.egyr.2022.10.439
Blomqvist, S., Ödlund, L., & Rohdin, P. (2022). Understanding energy efficiency decisions in the building sector—A survey of barriers and drivers in Sweden. CLEANER ENGINEERING AND TECHNOLOGY, 9. https://doi.org/10.1016/j.clet.2022.100527
Bomberg, M., Wojcik, R., & Piotrowski, J. (2016). A concept of integrated environmental approach, Part 2: Integrated approach to rehabilitation. JOURNAL OF BUILDING PHYSICS, 39(6), 482–502. https://doi.org/10.1177/1744259115624940
Bortali, M., Rabouli, M., Yessari, M., Errouhi, A., Zejli, D., & Hajjaji, A. (2022). Regulatory framework for the beneficial reuse of dredged sediments as construction materials: A case study in Morocco (WOS:000870671600024). 66, 441–446. https://doi.org/10.1016/j.matpr.2022.06.316
Bragança, L. & María Concepción Verde Muniesa. (2023). Measuring Carbon in Cities and Their Buildings through Reverse Engineering of Life Cycle Assessment. Applied System Innovation, 6(5), 76. https://doi.org/10.3390/asi6050076
Braun, K., Kropp, C., & Boeva, Y. (2022). From Digital Design to Data-Assets: Competing Visions, Policy Projects, and Emerging Arrangements of Value Creation in the Digital Transformation of Construction. Historical Social Research, 47(3). https://ezproxy.bu.edu/login?qurl=https://www.proquest.com/docview/2755157937?accountid=9676&bdid=81940&_bd=sFQKHx3SdRxQk1jhzrNfFHZk9Xs%3D
Braungardt, S., Bürger, V., & Köhler, B. (2021). Carbon Pricing and Complementary Policies—Consistency of the Policy Mix for Decarbonizing Buildings in Germany. Energies, 14(21), 7143. https://doi.org/10.3390/en14217143
Brismark, J., Malmqvist, T., & Borgström, S. (2022). Climate Mitigation in the Swedish Single-Family Homes Industry and Potentials for LCA as Decision Support. Buildings, 12(5), 588. https://doi.org/10.3390/buildings12050588
Britton, J. S. (2018). The Role of the City-Scale in Energy Transitions: Heat Networks in England and Germany. PQDT - UK & Ireland. https://ezproxy.bu.edu/login?qurl=https://www.proquest.com/docview/2351205089?accountid=9676&bdid=77468&_bd=rlfzx0tfEW7RTaDa%2FVKM3SKKQ0s%3D
Broad, O., Hawker, G., & Dodds, P. E. (2020). Decarbonising the UK residential sector: The dependence of national abatement on flexible and local views of the future. Energy Policy, 140, 111321. https://doi.org/10.1016/j.enpol.2020.111321
Broft, R., Badi, S. M., & Pryke, S. (2016). Towards supply chain maturity in construction. Built Environment Project and Asset Management, 6(2), 187–204. https://doi.org/10.1108/BEPAM-09-2014-0050
Brown, D. (2018). Business models for residential retrofit in the UK: a critical assessment of five key archetypes. Energy Efficiency, 11(6), 1497–1517. https://doi.org/10.1007/s12053-018-9629-5
Brown, D., Sorrell, S., & Kivimaa, P. (2019). Worth the risk? An evaluation of alternative finance mechanisms for residential retrofit. ENERGY POLICY, 128, 418–430. https://doi.org/10.1016/j.enpol.2018.12.033
Bucea-Manea-Țoniș, R., Oliva Maria Dourado Martins, Ilic, D., Belous, M., Radu Bucea-Manea-Țoniș, Braicu, C., & Violeta-Elena Simion. (2021). Green and Sustainable Public Procurement—An Instrument for Nudging Consumer Behavior. A Case Study on Romanian Green Public Agriculture across Different Sectors of Activity. Sustainability, 13(1), 12. https://doi.org/10.3390/su13010012
Buchard Martin Visby, & Christensen, T. B. (2024). Business models for the reuse of construction and demolition waste. Waste Management & Research, 42(5), 359–371. https://doi.org/10.1177/0734242X231188023
Buchholz, M., & Lützkendorf, T. (2023). European building passports: Developments, challenges and future roles. Buildings & Cities, 4(1), 902. https://doi.org/10.5334/bc.355
Bui, T. T. P., Domingo, N., MacGregor, C., & Wilkinson, S. (2022). Zero carbon refurbishment for existing buildings: A literature review. IOP Conference Series. Earth and Environmental Science, 1101(2), 022017. https://doi.org/10.1088/1755-1315/1101/2/022017
Bürger, V., Hesse, T., Köhler, B., Palzer, A., & Engelmann, P. (2019). German Energiewendedifferent visions for a (nearly) climate neutral building sector in 2050. ENERGY EFFICIENCY, 12(1), 73–87. https://doi.org/10.1007/s12053-018-9660-6
Bushra Danish Talpur, Liuzzi, S., Rubino, C., Cannavale, A., & Martellotta, F. (2023). Life Cycle Assessment and Circular Building Design in South Asian Countries: A Review of the Current State of the Art and Research Potentials. Buildings, 13(12), 3045. https://doi.org/10.3390/buildings13123045
Caetano, N. S., Carvalho, R. R., Franco, F. R., Afonso, C. A. R., & Felgueiras, C. (2018). Sustainable engineering labs—A Portuguese perspective. Energy Procedia, 153, 455–460. https://doi.org/10.1016/j.egypro.2018.10.077
Caetano, N., Carvalho, R., Franco, F., Afonso, C., & Felgueiras, C. (2018). Sustainable engineering labs—A Portuguese perspective (WOS:000470993600077). 153, 455–460. https://doi.org/10.1016/j.egypro.2018.10.077
Calle Müller, C., Pradhananga, P., & ElZomor, M. (2024). Pathways to decarbonization, circular construction, and sustainability in the built environment. International Journal of Sustainability in Higher Education, 25(6), 1315–1332. https://doi.org/10.1108/IJSHE-09-2023-0400
Camarasa, C., Kalahasthi, L. K., Sanchez-Díaz, I., Rosado, L., Hennes, L., Bienge, K., & Hamilton, I. (2021). Energy-Efficient Retrofit Measures (EERM) in Residential Buildings: An Application of Discrete Choice Modelling. Buildings, 11(6), 257. https://doi.org/10.3390/buildings11060257
Cappello, C., Giuffrida, S., Maria Rosa Trovato, & Ventura, V. (2022). Environmental Identities and the Sustainable City. The Green Roof Prospect for the Ecological Transition. Sustainability, 14(19), 12005. https://doi.org/10.3390/su141912005
Carcassi, O. B., Salierno, R., Falcinelli, P. A., Paoletti, I. M., & Ben-Alon, L. (2024). Upscaling Natural Materials in Construction: Earthen, Fast-Growing, and Living Materials. Sustainability, 16(18), 7926. https://doi.org/10.3390/su16187926
Cardoso, V. E., Sanhudo, L., Silvestre, J. D., Almeida, M., & Costa, A. A. (2024). Challenges in the harmonisation and digitalisation of Environmental Product Declarations for construction products in the European context. The International Journal of Life Cycle Assessment, 29(5), 759-788.
Carlander, J., & Thollander, P. (2023). Barriers to implementation of energy-efficient technologies in building construction projects—Results from a Swedish case study. RESOURCES ENVIRONMENT AND SUSTAINABILITY, 11. https://doi.org/10.1016/j.resenv.2022.100097
Carnero, P., & Calatayud, P. (2021). A Parametric Analysis for Short-Term Residential Electrification with Electric Water Tanks. The Case of Spain. SUSTAINABILITY, 13(21). https://doi.org/10.3390/su132112070
Cascone, S., Parisi, G., & Caponetto, R. (2024). BIM-Based Strategies for the Revitalization and Automated Management of Buildings: A Case Study. SUSTAINABILITY, 16(16). https://doi.org/10.3390/su16166720
Celik, Y., Barbero, I., Hodorog, A., Petri, I., & Rezgui, Y. (2024). Blockchain for Energy Efficiency Training in the Construction Industry. Education and Information Technologies, 29(1), 323–349. https://doi.org/10.1007/s10639-023-12261-y
Celoza, A., de Oliveira, D., & Leite, F. (2023). Qualitative Analysis of the Impact of Contracts on Information Management in AEC Projects. JOURNAL OF CONSTRUCTION ENGINEERING AND MANAGEMENT, 149(3). https://doi.org/10.1061/JCEMD4.COENG-12359
Challenges and drivers of BIM implementation in Sarawak construction industry. (2024). AIP Conference Proceedings, 2991(1). https://doi.org/10.1063/5.0199316
Chan, A., Darko, A., & Ameyaw, E. (2017). Strategies for Promoting Green Building Technologies Adoption in the Construction Industry-An International Study. SUSTAINABILITY, 9(6). https://doi.org/10.3390/su9060969
Chan, A., Darko, A., Ameyaw, E., & Owusu-Manu, D. (2017). Barriers Affecting the Adoption of Green Building Technologies. JOURNAL OF MANAGEMENT IN ENGINEERING, 33(3). https://doi.org/10.1061/(ASCE)ME.1943-5479.0000507
Chan, A., Darko, A., Olanipekun, A., & Ameyaw, E. (2018). Critical barriers to green building technologies adoption in developing countries: The case of Ghana. JOURNAL OF CLEANER PRODUCTION, 172, 1067–1079. https://doi.org/10.1016/j.jclepro.2017.10.235
Chan, D., Olawumi, T., & Ho, A. (2019). Perceived benefits of and barriers to Building Information Modelling (BIM) implementation in construction: The case of Hong Kong. JOURNAL OF BUILDING ENGINEERING, 25. https://doi.org/10.1016/j.jobe.2019.100764
Chan, E., Qian, Q., & Lam, P. (2009). The market for green building in developed Asian cities-the perspectives of building designers. ENERGY POLICY, 37(8), 3061–3070. https://doi.org/10.1016/j.enpol.2009.03.057
Chan, K., Schillereff, D. N., Baas, A. C., Chadwick, M. A., Main, B., Mulligan, M., O’Shea Francis T, Pearce, R., Smith, T. E., Arnout, van S., Tebbs Emma, & Thompson, J. (2021). Low-cost electronic sensors for environmental research: Pitfalls and opportunities. Progress in Physical Geography, 45(3), 305–338. https://doi.org/10.1177/0309133320956567
Chang, R., Soebarto, V., Zhao, Z., & Zillante, G. (2016). Facilitating the transition to sustainable construction: China’s policies. JOURNAL OF CLEANER PRODUCTION, 131, 534–544. https://doi.org/10.1016/j.jclepro.2016.04.147
Chansomsak, S., & Vale, B. (2010). PROGRESSING PRACTICES OF SUSTAINABLE SCHOOL DESIGN. JOURNAL OF GREEN BUILDING, 5(2), 147–157. https://doi.org/10.3992/jgb.5.2.147
Chappell, K. (2023). Will the construction industry ever manage to totally ditch diesel? Construction News, 18–18.
Chaturvedi, P., Kumar, N., & Lamba, R. (2024). Finding the gaps in design strategies and technological advancements for net-zero energy buildings development in India. ENERGY & ENVIRONMENT. https://doi.org/10.1177/0958305X241256039
Cheekatamarla, P. (2022). Role of On-Site Generation in Carbon Emissions and Utility Bill Savings under Different Electric Grid Scenarios. Energies, 15(10), 3477. https://doi.org/10.3390/en15103477
Cheekatamarla, P., & Nawaz, K. (2022). Global Building Decarbonization Trends and Strategies. Energies, 15(22), 8402. https://doi.org/10.3390/en15228402
Chegut, A., Eichholtz, P., & Kok, N. (2019). The price of innovation: An analysis of the marginal cost of green buildings. JOURNAL OF ENVIRONMENTAL ECONOMICS AND MANAGEMENT, 98. https://doi.org/10.1016/j.jeem.2019.07.003
Chen, J., Su, Y., Si, H., & Chen, J. (2018). Managerial Areas of Construction and Demolition Waste: A Scientometric Review. International Journal of Environmental Research and Public Health, 15(11), 2350. https://doi.org/10.3390/ijerph15112350
Chen, L., Darko, A., Adegoriola, M., Chan, A., Yang, Y., & Tetteh, M. (2024). Challenges to energy retrofitting of existing office buildings in high-rise high-density cities: The case of Hong Kong. ENERGY AND BUILDINGS, 312. https://doi.org/10.1016/j.enbuild.2024.114220
Chen, X., Shuai, C., Chen, Z., & Zhang, Y. (2019). What are the root causes hindering the implementation of green roofs in urban China? SCIENCE OF THE TOTAL ENVIRONMENT, 654, 742–750. https://doi.org/10.1016/j.scitotenv.2018.11.051
Chen, X., Vand, B., & Baldi, S. (2024). Challenges and Strategies for Achieving High Energy Efficiency in Building Districts. Buildings, 14(6), 1839. https://doi.org/10.3390/buildings14061839
Chen, Y., Cai, X., Li, J., Lin, P., Song, H., Liu, G., Cao, D., & Ma, X. (2023). The values and barriers of BIM implementation combination evaluation based on stakeholder theory: A study in China. ENGINEERING CONSTRUCTION AND ARCHITECTURAL MANAGEMENT, 30(7), 2814–2836. https://doi.org/10.1108/ECAM-08-2020-0607
Chen, Z., Chen, J., Chen, Y., & Pedrycz, W. (2024). Construction metaverse: Application framework and adoption barriers. AUTOMATION IN CONSTRUCTION, 163. https://doi.org/10.1016/j.autcon.2024.105422
Cheng, V. (2020). De-carbonizing Hong Kong-What energy strategies are effective? IOP Conference Series. Earth and Environmental Science, 588(2). https://doi.org/10.1088/1755-1315/588/2/022045
Chi Dara & Caroline Hachem Vermette. (2022). Life Cycle Embodied Energy and Carbon Emissions of Panelized Wall Systems. The International Journal of Architectonic, Spatial, and Environmental Design, 17(1), 37. https://doi.org/10.18848/2325-1662/CGP/v17i01/37-56
Chileshe, N., Rameezdeen, R., Hosseini, M., & Lehmann, S. (2015). Barriers to implementing reverse logistics in South Australian construction organisations. SUPPLY CHAIN MANAGEMENT-AN INTERNATIONAL JOURNAL, 20(2), 179–204. https://doi.org/10.1108/SCM-10-2014-0325
Chmutina, K., & Rose, J. (2018). Building resilience: Knowledge, experience and perceptions among informal construction stakeholders. INTERNATIONAL JOURNAL OF DISASTER RISK REDUCTION, 28, 158–164. https://doi.org/10.1016/j.ijdrr.2018.02.039
Chowdhury, M., Sabrina, H., Zzaman, R., & Ul Islam, S. (2022). Green building aspects in Bangladesh: A study based on experts opinion regarding climate change. ENVIRONMENT DEVELOPMENT AND SUSTAINABILITY, 24(7), 9260–9284. https://doi.org/10.1007/s10668-021-01823-0
Chro Hama Radha. (2023). Retrofitting for Improving Indoor Air Quality and Energy Efficiency in the Hospital Building. Sustainability, 15(4), 3464. https://doi.org/10.3390/su15043464
Chukwu, I. (2018). Sustainability in the Nigerian Construction Industry: The Feasibility of Adopting Green Building Rating System. ProQuest Dissertations and Theses. https://ezproxy.bu.edu/login?qurl=https://www.proquest.com/docview/2162853228?accountid=9676&bdid=81940&_bd=nveXM1ypvQaux6JG%2BGEq0ccxDoI%3D
Chung-Camargo, K., González, J., Miguel Chen Austin, Carpino, C., Mora, D., & Arcuri, N. (2024). Advances in Retrofitting Strategies for Energy Efficiency in Tropical Climates: A Systematic Review and Analysis. Buildings, 14(6), 1633. https://doi.org/10.3390/buildings14061633
Cioara, T., Antal, M., Mihailescu, V., Antal, C., Anghel, I., & Mitrea, D. (2021). Blockchain-Based Decentralized Virtual Power Plants of Small Prosumers. IEEE ACCESS, 9, 29490–29504. https://doi.org/10.1109/ACCESS.2021.3059106
Clarke, J., Littlewood, J. R., & Karani, G. (2023). Developing Tools to Enable the UK Construction Industry to Adopt the Active Building Concept for Net Zero Carbon Buildings. Buildings, 13(2), 304. https://doi.org/10.3390/buildings13020304
Climate Adaptation and Resilience Across Scales; From Buildings to Cities. (2021). Climate Adaptation and Resilience Across Scales. https://ezproxy.bu.edu/login?qurl=https://www.proquest.com/docview/2581456170?accountid=9676&bdid=77468&_bd=rjwB5o7dRm1iQkbG3P6%2Fu8KX3sw%3D
Cohen, J., Rosado, L., & Gil, J. (2022). How is the construction sector addressing the Circular Economy? Lessons from current practices and perceptions in Argentina. IOP Conference Series. Earth and Environmental Science, 1078(1), 012008. https://doi.org/10.1088/1755-1315/1078/1/012008
Collins, D., Junghans, A., & Haugen, T. (2018). Green leasing in commercial real estate; The drivers and barriers for owners and tenants of sustainable office buildings. Journal of Corporate Real Estate, 20(4), 244–259. https://doi.org/10.1108/JCRE-01-2017-0003
Colombier, M., & Li, J. (2012). Shaping climate policy in the housing sector in northern Chinese cities. Climate Policy, 12(4), 453. https://doi.org/10.1080/14693062.2011.592665
Condotta, M., & Zatta, E. (2021). Reuse of building elements in the architectural practice and the European regulatory context: Inconsistencies and possible improvements. JOURNAL OF CLEANER PRODUCTION, 318. https://doi.org/10.1016/j.jclepro.2021.128413
Constantinou, S., Al-naemi, F., Hameed Alrashidi, Mallick, T., & Issa, W. (2024). A review on technological and urban sustainability perspectives of advanced building-integrated photovoltaics. Energy Science & Engineering, 12(3), 1265–1293. https://doi.org/10.1002/ese3.1639
Creutzig, F., Simoes, S., Leipold, S., Berrill, P., Azevedo, I., Edelenbosch, O., Fishman, T., Haberl, H., Hertwich, E., Krey, V., Lima, A., Makov, T., Mastrucci, A., Milojevic-Dupont, N., Nachtigall, F., Pauliuk, S., Silva, M., Verdolini, E., van Vuuren, D., … Wilson, C. (2024). Demand-side strategies key for mitigating material impacts of energy transitions. NATURE CLIMATE CHANGE. https://doi.o…
Cui, H., & Xia, J. (2024). Research on the path of building carbon peak in China based on LMDI decomposition and GA-BP model. Environmental Science and Pollution Research, 31(15), 22694–22714. https://doi.org/10.1007/s11356-024-32591-9
Cupido, A., Baetz, B., Pujari, A., & Chidiac, S. (2010). EVALUATING INSTITUTIONAL GREEN BUILDING POLICIES: A Mixed-Methods Approach. JOURNAL OF GREEN BUILDING, 5(1), 115–131. https://doi.org/10.3992/jgb.5.1.115
D’Agostino, D., Tzeiranaki, S., Zangheri, P., & Bertoldi, P. (2021). Assessing Nearly Zero Energy Buildings (NZEBs) development in Europe. ENERGY STRATEGY REVIEWS, 36. https://doi.org/10.1016/j.esr.2021.100680
D’Oca, S., Ferrante, A., Ferrer, C., Pernetti, R., Gralka, A., Sebastian, R., & Veld, P. (2018). Technical, Financial, and Social Barriers and Challenges in Deep Building Renovation: Integration of Lessons Learned from the H2020 Cluster Projects. BUILDINGS, 8(12). https://doi.org/10.3390/buildings8120174
Da Silva, I. F. (2023). Promoting Sustainability in the Construction Sector: Assessment of the Reuse of Construction Materials. PQDT - Global. https://ezproxy.bu.edu/login?qurl=https://www.proquest.com/docview/3098796349?accountid=9676&bdid=81940&_bd=mheoW1sXjVeDvlLzs0dmR9sSn6o%3D
Dadar, A., Bolotin, S., Aslan Malsagov, & Oolakai, Z. (2019). Improving construction duration forecasts and management of construction operations. E3S Web of Conferences, 110, n/a. https://doi.org/10.1051/e3sconf/201911001078
Dalirazar, S., & Sabzi, Z. (2022). Barriers to sustainable development: Critical social factors influencing the sustainable building development based on Swedish experts’ perspectives. SUSTAINABLE DEVELOPMENT, 30(6), 1963–1974. https://doi.org/10.1002/sd.2362
Dalirazar, S., & Sabzi, Z. (2023). Strategic analysis of barriers and solutions to development of sustainable buildings using PESTLE technique. INTERNATIONAL JOURNAL OF CONSTRUCTION MANAGEMENT, 23(1), 167–181. https://doi.org/10.1080/15623599.2020.1854931
Dallapiccola, M., Barchi, G., Adami, J., & Moser, D. (2021). The Role of Flexibility in Photovoltaic and Battery Optimal Sizing towards a Decarbonized Residential Sector. ENERGIES, 14(8). https://doi.org/10.3390/en14082326
Daly, D., Carr, C., Daly, M., McGuirk, P., Stanes, E., & Santala, I. (2023). Extending urban energy transitions to the mid-tier: Insights into energy efficiency from the management of HVAC maintenance in “mid-tier” office buildings. ENERGY POLICY, 174. https://doi.org/10.1016/j.enpol.2022.113415
Dams, B., Maskell, D., Shea, A., Allen, S., Cascione, V., & Walker, P. (2023). Upscaling bio-based construction: Challenges and opportunities. BUILDING RESEARCH AND INFORMATION, 51(7), 764–782. https://doi.org/10.1080/09613218.2023.2204414
Darko, A., Chan, A., Ameyaw, E., He, B., & Olanipekun, A. (2017). Examining issues influencing green building technologies adoption: The United States green building experts’ perspectives. ENERGY AND BUILDINGS, 144, 320–332. https://doi.org/10.1016/j.enbuild.2017.03.060
Darko, A., Chan, A., Yang, Y., Shan, M., He, B., & Gou, Z. (2018). Influences of barriers, drivers, and promotion strategies on green building technologies adoption in developing countries: The Ghanaian case. JOURNAL OF CLEANER PRODUCTION, 200, 687–703. https://doi.org/10.1016/j.jclepro.2018.07.318
Dat Tien Doan, Albsoul, H., & GhaffarianHoseini, A. (2023). Enhancing construction waste management in New Zealand: Lessons from Hong Kong and other countries. Environmental Research Communications, 5(10), 102001. https://doi.org/10.1088/2515-7620/ad0105
Dauda, J., & Ajayi, S. (2022). Understanding the impediments to sustainable structural retrofit of existing buildings in the UK. JOURNAL OF BUILDING ENGINEERING, 60. https://doi.org/10.1016/j.jobe.2022.105168
Dawes, J. (2018). Trending toward zero carbon. Grand Rapids Business Journal, 36(1), 1–4.
Dawes, Ruth. (2010). Building to Improve Energy Efficiency in England and Wales. Environmental Law Review. 12. 266-281. 10.1350/enlr.2010.12.4.101.
de Almeida, L., Esposito, F., & van Zeben, J. (2022). When indicators fail electricity policies: Pitfalls of the EU’s retail energy market Barrier Index. Energy Policy, 165, 1. https://doi.org/10.1016/j.enpol.2022.112892
De Araujo, V. (2023). Timber construction as a multiple valuable sustainable alternative: Main characteristics, challenge remarks and affirmative actions. INTERNATIONAL JOURNAL OF CONSTRUCTION MANAGEMENT, 23(8), 1334–1343. https://doi.org/10.1080/15623599.2021.1969742
De Silva, G., Perera, B., & Rodrigo, M. (2019). Adaptive reuse of buildings: The case of Sri Lanka. JOURNAL OF FINANCIAL MANAGEMENT OF PROPERTY AND CONSTRUCTION, 24(1), 79–96. https://doi.org/10.1108/JFMPC-11-2017-0044
Deason, J., & Borgeson, M. (2019). Electrification of Buildings: Potential, Challenges, and Outlook. Current Sustainable / Renewable Energy Reports, 6(4), 131–139. https://doi.org/10.1007/s40518-019-00143-2
Deetjen, T., Conger, J., Leibowicz, B., & Webber, M. (2018). Review of climate action plans in 29 major US cities: Comparing current policies to research recommendations. SUSTAINABLE CITIES AND SOCIETY, 41, 711–727. https://doi.org/10.1016/j.scs.2018.06.023
Del Rio, D., Sovacool, B., & Griffiths, S. (2021). Culture, energy and climate sustainability, and smart home technologies: A mixed methods comparison of four countries. ENERGY AND CLIMATE CHANGE, 2. https://doi.org/10.1016/j.egycc.2021.100035
Del Rio, D., Sovacool, B., Foley, A., Griffiths, S., Bazilian, M., Kim, J., & Rooney, D. (2022a). Decarbonizing the ceramics industry: A systematic and critical review of policy options, developments and sociotechnical systems. RENEWABLE & SUSTAINABLE ENERGY REVIEWS, 157. https://doi.org/10.1016/j.rser.2022.112081
Del Rio, D., Sovacool, B., Foley, A., Griffiths, S., Bazilian, M., Kim, J., & Rooney, D. (2022b). Decarbonizing the glass industry: A critical and systematic review of developments, sociotechnical systems and policy options. RENEWABLE & SUSTAINABLE ENERGY REVIEWS, 155. https://doi.org/10.1016/j.rser.2021.111885
Dell’Anna, F., Marmolejo-Duarte, C., Bravi, M., & Bottero, M. (2022). A choice experiment for testing the energy-efficiency mortgage as a tool for promoting sustainable finance. Energy Efficiency, 15(5). https://doi.org/10.1007/s12053-022-10035-y
Delmastro, C., & Gargiulo, M. (2020). Capturing the long-term interdependencies between building thermal energy supply and demand in urban planning strategies. APPLIED ENERGY, 268. https://doi.org/10.1016/j.apenergy.2020.114774
Delponte, I., Bianco, V., & Costa, V. (2022). The Role of Non-Energy Impact Assessment in Boosting Energy Efficiency and Urban Regeneration Projects: The RenOnBill Project and Experiences from Liguria Region. Energies, 15(11), 4093. https://doi.org/10.3390/en15114093
Deng, W., Yang, T., Tang, L., & Tang, Y.-T. (2018). Barriers and policy recommendations for developing green buildings from local government perspective: A case study of Ningbo China. Intelligent Buildings International, 10(2), 61. https://doi.org/10.1080/17508975.2016.1248342
Design & development of system to manage, buy & sell construction and demolition waste. (2024). AIP Conference Proceedings, 3139(1). https://doi.org/10.1063/5.0224589
Desport, L., & Selosse, S. (2022). An overview of CO2 capture and utilization in energy models. RESOURCES CONSERVATION AND RECYCLING, 180. https://doi.org/10.1016/j.resconrec.2021.106150
Di Turi, S., Ronchetti, L., Sannino, R., Calabrese, N., & Iatauro, D. (2024). The energy renovation pathway to ZEB in Italy: Analysis of typical buildings and methodological aspects (WOS:001223831500022). 523. https://doi.org/10.1051/e3sconf/202452304002
Dialga, I., & Thi Hang Giang, L. (2017). Highlighting Methodological Limitations in the Steps of Composite Indicators Construction. Social Indicators Research, 131(2), 441. https://doi.org/10.1007/s11205-016-1263-z
Ding, Z., Fan, Z., Tam, V., Bian, Y., Li, S., Illankoon, I., & Moon, S. (2018). Green building evaluation system implementation. BUILDING AND ENVIRONMENT, 133, 32–40. https://doi.org/10.1016/j.buildenv.2018.02.012
Doak, A., Stanier, C., Anthony, J., & Udaykumar, H. (2022). Can heat-pumps provide routes to decarbonization of building thermal control in the US Midwest? ENERGY SCIENCE & ENGINEERING, 10(8), 2612–2621. https://doi.org/10.1002/ese3.1159
Doh, S. I. (2023). Adoption approaches for BIM implementation in construction projects: Jordan as a case study. AIP Conference Proceedings, 2688(1). https://doi.org/10.1063/5.0141978
Dolge, K., & Blumberga, D. (2023). Transitioning to Clean Energy: A Comprehensive Analysis of Renewable Electricity Generation in the EU-27. ENERGIES, 16(18). https://doi.org/10.3390/en16186415
Domenig, C., Scheller, F., Gunkel, P., Hermann, J., Bergaentzlé, C., Lopes, M., Barnes, J., & Mckenna, R. (2024). Overcoming the landlord-tenant dilemma: A techno-economic assessment of collective self-consumption for European multi-family buildings. ENERGY POLICY, 189. https://doi.org/10.1016/j.enpol.2024.114120
Dooley, K. (2017). Routines, Rigidity and Real Estate: Organisational Innovations in the Workplace. Sustainability, 9(6), 998. https://doi.org/10.3390/su9060998
Dorr, E., François, C., Poulhès, A., & Wurtz, A. (2022). A life cycle assessment method to support cities in their climate change mitigation strategies. SUSTAINABLE CITIES AND SOCIETY, 85. https://doi.org/10.1016/j.scs.2022.104052
Downing, L., & Hsu, D. (2024). Decarbonizing Affordable Housing in New York City: Options and Obstacles to Scale Up Deep Energy Retrofits. CASE STUDIES IN THE ENVIRONMENT, 8(1). https://doi.org/10.1525/cse.2024.2253451
Drummond, P., & Ekins, P. (2017). Cost-effective decarbonization in the EU: an overview of policy suitability. Climate Policy, 17(sup1), 51. https://doi.org/10.1080/14693062.2016.1258634
Durdyev, S., Koc, K., Tleuken, A., Budayan, C., Ekmekcioglu, O., & Karaca, F. (2023). Barriers to circular economy implementation in the construction industry: Causal assessment model. ENVIRONMENT DEVELOPMENT AND SUSTAINABILITY. https://doi.org/10.1007/s10668-023-04061-8
Durdyev, S., Mbachu, J., Thurnell, D., Zhao, L., & Hosseini, M. (2021). BIM Adoption in the Cambodian Construction Industry: Key Drivers and Barriers. ISPRS INTERNATIONAL JOURNAL OF GEO-INFORMATION, 10(4). https://doi.org/10.3390/ijgi10040215
Durdyev, S., Zavadskas, E., Thurnell, D., Banaitis, A., & Ihtiyar, A. (2018). Sustainable Construction Industry in Cambodia: Awareness, Drivers and Barriers. SUSTAINABILITY, 10(2). https://doi.org/10.3390/su10020392
E Yu Gorbachevskaya, Bezrukikh, O. A., & Safronov, D. A. (2021). Wooden house building market: Technological problems in development issues. IOP Conference Series. Earth and Environmental Science, 751(1). https://doi.org/10.1088/1755-1315/751/1/012090
Ebekozien, A., Aigbavboa, C., Adekunle, S., Samsurijan, M., Aliu, J., Arthur-Aidoo, B., & Amadi, G. (2024). Smart contract applications in the built environment: How prepared are Nigerian construction stakeholders? FRONTIERS OF ENGINEERING MANAGEMENT, 11(1), 50–61. https://doi.org/10.1007/s42524-023-0275-z
Ebekozien, A., Ayo-Odifiri, S., Nwaole, A., Ibeabuchi, A., & Uwadia, F. (2022). Barriers in Nigeria’s public hospital green buildings implementation initiatives. JOURNAL OF FACILITIES MANAGEMENT, 20(4), 586–605. https://doi.org/10.1108/JFM-01-2021-0009
Ebekozien, A., Ikuabe, M., Awo-Osagie, A., Aigbavboa, C., & Ayo-Odifiri, S. (2022). Model for promoting green certification of buildings in developing nations: A case study of Nigeria. PROPERTY MANAGEMENT, 40(1), 118–136. https://doi.org/10.1108/PM-05-2021-0033
Edelson, J., & Miller, A., PE. (2019). Taking the (Fuel) Blinders off Energy Codes Part 2: Metrics and Mechanics in the Modern Era. ASHRAE Transactions, 125, 461–469.
Eguiarte, O., Garrido-Marijuán, A., De Agustín-Camacho, P., del Portillo, L., & Romero-Amorrortu, A. (2020). Energy, Environmental and Economic Analysis of Air-to-Air Heat Pumps as an Alternative to Heating Electrification in Europe. ENERGIES, 13(15). https://doi.org/10.3390/en13153939
Ehis Lawrence Onus, Chinyio, E., & Daniel, E. I. (2024). ‘Stakeholder Perceptions’ of the Impacts of Climatic Features on Residents and Residences: A UK Study. Atmosphere, 15(7), 791. https://doi.org/10.3390/atmos15070791
Eichhammer, W., Ragwitz, M., & Schlomann, B. (2013). Financing instruments to promote energy efficiency and renewables in times of tight public budgets. Energy & Environment, 24(1-2), 1-26.
Eley, C. (2016). Design Professional’s Guide to Zero Net Energy Buildings. Design Professional’s Guide to Zero Net Energy Buildings. https://ezproxy.bu.edu/login?qurl=https://www.proquest.com/docview/2134057843?accountid=9676&bdid=77468&_bd=l7df1NGfV%2F8QHPpMjINLiYb0GHw%3D
Elliott, T., Geske, J., & Green, R. (2022). Business Models for Active Buildings. Energies, 15(19), 7389. https://doi.org/10.3390/en15197389
Emre Caner Akcay. (2023). Barriers to Undertaking Green Building Projects in Developing Countries: A Turkish Perspective. Buildings, 13(4), 841. https://doi.org/10.3390/buildings13040841
Energy Retrofitting Opportunities Using Renewable Materials—Comparative Analysis of the Current Frameworks in Bosnia-Herzegovina and Slovenia. (2021). Sustainability, 13(2), 603. https://doi.org/10.3390/su13020603
Enhancing the appearance of Building Integrated Photovoltaics (BIPV) through the application of traditional symbols: A case study. (2022). AIP Conference Proceedings, 2681(1). https://doi.org/10.1063/5.0114941
Enshassi, A., & AbUHamra, L. (2017). Challenges to the Utilization of BIM in the Palestinian Construction Industry. ISARC. Proceedings of the International Symposium on Automation and Robotics in Construction, 34. https://ezproxy.bu.edu/login?qurl=https://www.proquest.com/docview/1943517356?accountid=9676&bdid=81940&_bd=Ujcg5QNgXlI5Hhkd5MFFmuapEVs%3D
Eon, C., Breadsell, J. K., Byrne, J., & Morrison, G. M. (2020). The Discrepancy between As-Built and As-Designed in Energy Efficient Buildings: A Rapid Review. Sustainability, 12(16), 6372. https://doi.org/10.3390/su12166372
European Union: Opening remarks by Executive Vice-President Timmermans and Commissioner Simson at the press conference Building a Climate Neutral Europe. (2020). Asia News Monitor. https://ezproxy.bu.edu/login?qurl=https://www.proquest.com/docview/2450816125?accountid=9676&bdid=77468&_bd=Qa%2BJ3qLUBju58UMtetdHzcKBBAg%3D
Eveloy, V., & Ayou, D. S. (2019). Sustainable District Cooling Systems: Status, Challenges, and Future Opportunities, with Emphasis on Cooling-Dominated Regions. Energies, 12(2), 235. https://doi.org/10.3390/en12020235
Eyre, N., Fawcett, T., Topouzi, M., Killip, G., Oreszczyn, T., & Rosenow, J. (2023). Fabric first: Is it still the right approach? Buildings & Cities, 4(1), 965. https://doi.org/10.5334/bc.388
Eze, E. C., Sofolahan, O., & Omoboye, O. G. (2023). Assessment of barriers to the adoption of sustainable building materials (SBM) in the construction industry of a developing country. Frontiers in Engineering and Built Environment, 3(3), 153–166. https://doi.org/10.1108/FEBE-07-2022-0029
Eze, E., Sofolahan, O., Uzoma, C., Ameyaw, E., & Omoboye, O. (2024). Impediments to building information modelling-enabled construction waste management in Nigeria. BUILT ENVIRONMENT PROJECT AND ASSET MANAGEMENT. https://doi.org/10.1108/BEPAM-12-2023-0217
Faber, A., & Hoppe, T. (2013). Co-constructing a sustainable built environment in the Netherlands—Dynamics and opportunities in an environmental sectoral innovation system. Energy Policy, 52, 628–638.
Farahani, A., & Dalenbäck, J. (2019). Optimizing the Life Cycle Costs of Building Components with Regard to Energy Renovation (WOS:000675599300023). 265–274. https://doi.org/10.1007/978-3-030-00662-4_23
Farouk, A. M., Zulhisham, A. Z., Lee, Y. S., Mohammad Sadra Rajabi, & Rahman, R. A. (2023). Factors, Challenges and Strategies of Trust in BIM-Based Construction Projects: A Case Study in Malaysia. Infrastructures, 8(1), 13. https://doi.org/10.3390/infrastructures8010013
Fathalizadeh, A., Hosseini, M., Vaezzadeh, S., Edwards, D., Martek, I., & Shooshtarian, S. (2022). Barriers to sustainable construction project management: The case of Iran. SMART AND SUSTAINABLE BUILT ENVIRONMENT, 11(3), 717–739. https://doi.org/10.1108/SASBE-09-2020-0132
Fawcett, T., & Topouzi, M. (2019). What buildings policy might look like if we took climate change seriously. IOP Conference Series. Earth and Environmental Science, 329(1). https://doi.org/10.1088/1755-1315/329/1/012004
Fayez Musa, F. S. (2017). Communicating Sustainability: A Case Study Exploring Jordan Green Building Council’s Sustainability Communication Techniques. ProQuest Dissertations and Theses. https://ezproxy.bu.edu/login?qurl=https://www.proquest.com/docview/1929640900?accountid=9676&bdid=81940&_bd=WsFNCAV4gVP320NcxSEEII2uyqg%3D
Feige, A., Wallbaumand, H., & Krank, S. (2011). Harnessing stakeholder motivation: Towards a Swiss sustainable building sector. BUILDING RESEARCH AND INFORMATION, 39(5), 504–517. https://doi.org/10.1080/09613218.2011.589788
Feng, L., Liu, J., Wang, Z., & Hong, Y. (2024). Navigating compliance complexity: Insights from the MOA framework in international construction. ENGINEERING CONSTRUCTION AND ARCHITECTURAL MANAGEMENT. https://doi.org/10.1108/ECAM-02-2024-0163
Fernandes, J., & Ferrão, P. (2023). A New Framework for Circular Refurbishment of Buildings to Operationalize Circular Economy Policies. Environments, 10(3), 51. https://doi.org/10.3390/environments10030051
Fernando, S., Hansen, E., Kozak, R., & Sinha, A. (2018). Organizational cultural compatibility of engineered wood products manufacturers and building specifiers in the Pacific Northwest. ARCHITECTURAL ENGINEERING AND DESIGN MANAGEMENT, 14(5), 398–410. https://doi.org/10.1080/17452007.2018.1491384
Ferreira, M., Morgado, C., & Estellita, M. (2024). Organizations and stakeholders’ roles and influence on implementing sustainability requirements in construction projects. HELIYON, 10(1). https://doi.org/10.1016/j.heliyon.2023.e23762
Fina, B., Roberts, M., Auer, H., Bruce, A., & MacGill, I. (2021). Exogenous influences on deployment and profitability of photovoltaics for self-consumption in multi-apartment buildings in Australia and Austria. APPLIED ENERGY, 283. https://doi.org/10.1016/j.apenergy.2020.116309
Fiore, P., Donnarumma, G., Falce, C., Emanuela D’Andria, & Sicignano, C. (2020). An AHP-Based Methodology for Decision Support in Integrated Interventions in School Buildings. Sustainability, 12(23), 10181. https://doi.org/10.3390/su122310181
Fisch-Romito, V., Guivarch, C., Creutzig, F., Minx, J. C., & Callaghan, M. W. (2021). Systematic map of the literature on carbon lock-in induced by long-lived capital. Environmental Research Letters, 16(5). https://doi.org/10.1088/1748-9326/aba660
Fitriani, H., & Ajayi, S. (2023). Barriers to sustainable practices in the Indonesian construction industry. JOURNAL OF ENVIRONMENTAL PLANNING AND MANAGEMENT, 66(10), 2028–2050. https://doi.org/10.1080/09640568.2022.2057281
Foliente, G., & Seo, S. (2012). Modelling building stock energy use and carbon emission scenarios. Smart and Sustainable Built Environment, 1(2), 118. https://doi.org/10.1108/20466091211260578
Forsberg, M. & Clarice Bleil de Souza. (2021). Implementing Regenerative Standards in Politically Green Nordic Social Welfare States: Can Sweden Adopt the Living Building Challenge? Sustainability, 13(2), 738. https://doi.org/10.3390/su13020738
Fotiou, T., Capros, P., & Fragkos, P. (2022). Policy Modelling for Ambitious Energy Efficiency Investment in the EU Residential Buildings. ENERGIES, 15(6). https://doi.org/10.3390/en15062233
Fotiou, T., de Vita, A., & Capros, P. (2019). Economic-Engineering Modelling of the Buildings Sector to Study the Transition towards Deep Decarbonisation in the EU. ENERGIES, 12(14). https://doi.org/10.3390/en12142745
Fotiou, T., Fragkos, P., & Zisarou, E. (2024). Decarbonising the EU Buildings|Model-Based Insights from European Countries. Climate, 12(6), 85. https://doi.org/10.3390/cli12060085
Fournier, E., Federico, F., Cudd, R., Pincetl, S., Ricklefs, A., Costa, M., Jerrett, M., & Garcia-Gonzales, D. (2022). Net GHG emissions and air quality outcomes from different residential building electrification pathways within a California disadvantaged community. SUSTAINABLE CITIES AND SOCIETY, 86. https://doi.org/10.1016/j.scs.2022.104128
Franco, D., Macke, J., Cotton, D., Paço, A., Segers, J.-P., & Franco, L. (2022). Student energy-saving in higher education tackling the challenge of decarbonisation. International Journal of Sustainability in Higher Education, 23(7), 1648–1666. https://doi.org/10.1108/IJSHE-10-2021-0432
Franco, M., Pawar, P., & Wu, X. (2021). Green building policies in cities: A comparative assessment and analysis. ENERGY AND BUILDINGS, 231. https://doi.org/10.1016/j.enbuild.2020.110561
Franzini, F., Toivonen, R., & Toppinen, A. (2018). Why Not Wood? Benefits and Barriers of Wood as a Multistory Construction Material: Perceptions of Municipal Civil Servants from Finland. Buildings, 8(11), 159. https://doi.org/10.3390/buildings8110159
Fregonara, E., & Rubino, I. (2021). Buildings’ energy performance, green attributes and real estate prices: Methodological perspectives from the European literature. Aestimum, 79, 43–73. https://doi.org/10.36253/aestim-10785
Friedman, R. A. (2018). Taking the Measure of Benchmarking. Multi - Housing News, 52(8), 12–13.
Friege, J., Holtz, G., & Chappin, É. (2016). Exploring Homeowners’ Insulation Activity. JASSS-THE JOURNAL OF ARTIFICIAL SOCIETIES AND SOCIAL SIMULATION, 19(1). https://doi.org/10.18564/jasss.2941
Frischknecht, R., Balouktsi, M., Lützkendorf, T., Aumann, A., Birgisdottir, H., Elmar Grosse Ruse, Hollberg, A., Kuittinen, M., Lavagna, M., Lupišek, A., Passer, A., Peuportier, B., Ramseier, L., Röck, M., Trigaux, D., & Vancso, D. (2019). Environmental benchmarks for buildings: Needs, challenges and solutions—71st LCA forum, Swiss Federal Institute of Technology, Zürich, 18 June 2019. The Intern…
Fufa, S., Brown, M., Hauge, Å., Johnsen, S., & Fjellheim, K. (2023). User perspectives on reuse of construction products in Norway: Results of a national survey. JOURNAL OF CLEANER PRODUCTION, 408. https://doi.org/10.1016/j.jclepro.2023.137067
Fuinhas, J. A., Matheus Koengkan, Silva, N., Kazemzadeh, E., Auza, A., Santiago, R., Teixeira, M., & Osmani, F. (2022). The Impact of Energy Policies on the Energy Efficiency Performance of Residential Properties in Portugal. Energies, 15(3), 802. https://doi.org/10.3390/en15030802
Fulvio Re Cecconi, & Rampini, L. (2023). Data driven economic scenarios for retrofitting residential buildings in a northern Italian region. IOP Conference Series. Earth and Environmental Science, 1196(1), 012113. https://doi.org/10.1088/1755-1315/1196/1/012113
Gaffar, R. A. (2016). Assess the Level of Public Awareness in UAE - Green Roof & Facades (Benefits & Obstacles). PQDT - Global. https://ezproxy.bu.edu/login?qurl=https://www.proquest.com/docview/2878260949?accountid=9676&bdid=81940&_bd=0JkKIOnM08i37fwcM9QbaquY3do%3D
Galimshina, A., Moustapha, M., Hollberg, A., Lasvaux, S., Sudret, B., & Habert, G. (2024). Strategies for robust renovation of residential buildings in Switzerland. Nature Communications, 15(1), 2227. https://doi.org/10.1038/s41467-024-46305-9
Galvin, R. (2021). Identifying possible drivers of rebound effects and reverse rebounds among households with rooftop photovoltaics. RENEWABLE ENERGY FOCUS, 38, 71–83. https://doi.org/10.1016/j.ref.2021.06.002
Galvin, R. (2024). Deep energy efficiency renovation of Germany’s residential buildings: Is this as economically viable as Germany’s policymakers and popular promoters often claim? Energy Efficiency, 17(5), 47. https://doi.org/10.1007/s12053-024-10227-8
Gamil, Y., & Rahman, I. (2019). Awareness and challenges of building information modelling (BIM) implementation in the Yemen construction industry. JOURNAL OF ENGINEERING DESIGN AND TECHNOLOGY, 17(5), 1077–1084. https://doi.org/10.1108/JEDT-03-2019-0063
Gan, X., Chang, R., & Wen, T. (2018). Overcoming barriers to off-site construction through engaging stakeholders: A two-mode social network analysis. JOURNAL OF CLEANER PRODUCTION, 201, 735–747. https://doi.org/10.1016/j.jclepro.2018.07.299
Gan, X., Chang, R., Zuo, J., Wen, T., & Zillante, G. (2018). Barriers to the transition towards off-site construction in China: An Interpretive structural modeling approach. JOURNAL OF CLEANER PRODUCTION, 197, 8–18. https://doi.org/10.1016/j.jclepro.2018.06.184
Gan, X., Liu, L., Wen, T., & Webber, R. (2022). Modelling interrelationships between barriers to adopting green building technologies in China’s rural housing via grey-DEMATEL. TECHNOLOGY IN SOCIETY, 70. https://doi.org/10.1016/j.techsoc.2022.102042
Garces, P., Pires, C., Costa, J., Jorge, S., Catalao-Lopes, M., & Alventosa, A. (2022). Disentangling Housing Supply to Shift towards Smart Cities: Analysing Theoretical and Empirical Studies. SMART CITIES, 5(4), 1488–1507. https://doi.org/10.3390/smartcities5040076
Gasue, R., Aklashie, S., Dompey, A., Agyekum, K., & Opoku, D. (2024). Implementing materials passports in the construction industry: Empirical evidence from Ghana. INTERNATIONAL JOURNAL OF BUILDING PATHOLOGY AND ADAPTATION. https://doi.org/10.1108/IJBPA-01-2024-0007
Geh, N., Emuze, F., & Das, D. (2022). Barriers to the deployment of solar photovoltaic in public universities in South Africa: A Delphi study. INTERNATIONAL JOURNAL OF BUILDING PATHOLOGY AND ADAPTATION. https://doi.org/10.1108/IJBPA-11-2021-0147
Geh, N., Emuze, F., & Das, D. (2023). Solar photovoltaic deployment acceleration model to advance the sustainability of buildings in public universities in South Africa. ENERGY AND BUILDINGS, 284. https://doi.org/10.1016/j.enbuild.2023.112855
Geissler, S., & Spitzbart, C. (2010). Sustainable buildings in Austria—Performance indicators and implications on the construction industry (WOS:000281122400046). 128, 539–550. https://doi.org/10.2495/ARC100461
Geissler, S., Charalambides, A. G., & Hanratty, M. (2019). Public Access to Building Related Energy Data for Better Decision Making in Implementing Energy Efficiency Strategies: Legal Barriers and Technical Challenges. Energies, 12(10), n/a. https://doi.org/10.3390/en12102029
Gembali, V., Kumar, A., & Sarma, P. (2024). Analysis and influence mapping of socio-technical challenges for developing decarbonization and circular economy practices in the construction and building industry. ANNALS OF OPERATIONS RESEARCH. https://doi.org/10.1007/s10479-024-05864-2
Geng, J., Huang, Y., Li, X., & Zhang, Y. (2023). Overcoming Barriers to the Adoption of Recycled Construction Materials: A Comprehensive PEST Analysis and Tailored Strategies. SUSTAINABILITY, 15(19). https://doi.org/10.3390/su151914635
Geng, Y., Dong, H., Xue, B., & Fu, J. (2012). An Overview of Chinese Green Building Standards. SUSTAINABLE DEVELOPMENT, 20(3), 211–221. https://doi.org/10.1002/sd.1537
Georges, L., Selvnes, E., Heide, V., & Mathisen, H. M. (2019). Energy efficiency of strategies to enable temperature zoning during winter in highly-insulated residential buildings equipped with balanced mechanical ventilation. IOP Conference Series. Earth and Environmental Science, 352(1). https://doi.org/10.1088/1755-1315/352/1/012057
Ghaleb, B., Abbasi, S., & Asif, M. (2023). Application of solar PV in the building sector: Prospects and barriers in the GCC region. ENERGY REPORTS, 9, 3932–3942. https://doi.org/10.1016/j.egyr.2023.02.085
Ghansah, F. A., De-Graft, O.-M., Ayarkwa, J., Edwards, D. J., & Hosseini, M. R. (2021). Exploration of latent barriers inhibiting project management processes in adopting smart building technologies (SBTs) in the developing countries. Construction Innovation, 21(4), 685–707. https://doi.org/10.1108/CI-07-2020-0116
Gharaibeh, L., Matarneh, S., Eriksson, K., & Lantz, B. (2022). An Empirical Analysis of Barriers to Building Information Modelling (BIM) Implementation in Wood Construction Projects: Evidence from the Swedish Context. BUILDINGS, 12(8). https://doi.org/10.3390/buildings12081067
Gholami, H., Røstvik, H. N., & Steemers, K. (2021). The Contribution of Building-Integrated Photovoltaics (BIPV) to the Concept of Nearly Zero-Energy Cities in Europe: Potential and Challenges Ahead. Energies, 14(19), 6015. https://doi.org/10.3390/en14196015
Giesekam, J., Barrett, J. R., & Taylor, P. (2016). Construction sector views on low carbon building materials. Building Research and Information, 44(4), 423. https://doi.org/10.1080/09613218.2016.1086872
Gillott, C., Davison, B., & Densley Tingley, D. (2022). Drivers, barriers and enablers: Construction sector views on vertical extensions. Building Research & Information, 50(8), 909–923. https://doi.org/10.1080/09613218.2022.2087173
Giostra, S., Masera, G., & Monteiro, R. (2022). Solar Typologies: A Comparative Analysis of Urban Form and Solar Potential. Sustainability, 14(15), 9023. https://doi.org/10.3390/su14159023
Global Green USA, G. G. (2007). Blueprint for Greening Affordable Housing. Blueprint for Greening Affordable Housing. https://ezproxy.bu.edu/login?qurl=https://www.proquest.com/docview/2131948619?accountid=9676&bdid=77468&_bd=frB3oCSS6Ib80%2FVOs12GeibwUqA%3D
Glorianne Borg Axisa, & Borg, R. P. (2024). Climate change adaptation in Malta: Assessment of skills in the built environment. International Journal of Disaster Resilience in the Built Environment, 15(4), 668–679. https://doi.org/10.1108/IJDRBE-10-2023-0116
Gokarakonda, S., & Kumar, A. (2016). Passive Architectural Design Index applied to vernacular and passive buildings. International Journal of Environmental Studies, 73(4), 563-572.
Gold, R. (2021). Status Report on Electrification Policy: Where to Next? Current Sustainable / Renewable Energy Reports, 8(2), 114–122. https://doi.org/10.1007/s40518-021-00180-w
Golic, K., Kosoric, V., Kosic, T., Vuckovic, S., & Kujundzic, K. (2023). A Platform of Critical Barriers to Socially Sustainable Residential Buildings: Experts’ Perspective. SUSTAINABILITY, 15(9). https://doi.org/10.3390/su15097485
Golizadeh, H., Hosseini, M., Edwards, D., Abrishami, S., Taghavi, N., & Banihashemi, S. (2019). Barriers to adoption of RPAs on construction projects: A task-technology fit perspective. CONSTRUCTION INNOVATION-ENGLAND, 19(2), 149–169. https://doi.org/10.1108/CI-09-2018-0074
Gombošová, V., Krajčík, M., & Šikula, O. (2022). Feasibility of Using Energy Performance Contracting for the Retrofit of Apartment Buildings in Slovakia. Slovak Journal of Civil Engineering, 30(3), 33–42. https://doi.org/10.2478/sjce-2022-0019
Gonzalez Quiros, A., MacAllister, D. J., MacDonald, A., Palumbo-Roe, B., Bearcock, J., Ó Dochartaigh, B., Callaghan, E., Kearsey, T., Walker-Verkuil, K., & Monaghan, A. (2024). De-risking green energy from mine waters by developing a robust hydrogeological conceptual model of the UK Geoenergy Observatory in Glasgow. Hydrogeology Journal, 32(5), 1307–1329. https://doi.org/10.1007/s10040-024-02778-y
González-Torres, M., Pérez-Lombard, L., Coronel, J., Maestre, I., & Yan, D. (2022). A review on buildings energy information: Trends, end-uses, fuels and drivers. ENERGY REPORTS, 8, 626–637. https://doi.org/10.1016/j.egyr.2021.11.280
Gordon, J. A., Balta-Ozkan, N., Haq, A. U., & Nabavi, S. A. (2024). Heterogeneous preferences for living in a hydrogen home: An advanced multigroup analysis. Sustainable Energy & Fuels, 8(12), 2601–2648. https://doi.org/10.1039/D4SE00392F
Göswein, V., Carvalho, S., Cerqueira, C., & Lorena, A. (2022). Circular material passports for buildings – Providing a robust methodology for promoting circular buildings. IOP Conference Series. Earth and Environmental Science, 1122(1), 012049. https://doi.org/10.1088/1755-1315/1122/1/012049
Gounder, S., Hasan, A., Shrestha, A., & Elmualim, A. (2023). Barriers to the use of sustainable materials in Australian building projects. ENGINEERING CONSTRUCTION AND ARCHITECTURAL MANAGEMENT, 30(1), 189–209. https://doi.org/10.1108/ECAM-10-2020-0854
Grady, G. C. (2012). Land Use Incentives And Enforcement In Government “Green” Requirements. The Practical Real Estate Lawyer, 28(2), 43.
Graham, R., & Dutton, J. (2021). Obsolescence as an Opportunity: The Role of Adaptive Reuse in Calgary’s Office Market. The School of Public Policy Publications (SPPP), 14, n/a. https://doi.org/10.11575/sppp.v14i.71326
Gram-Hanssen, K., Jensen, J. O., & Friis, F. (2018). Local strategies to promote energy retrofitting of single-family houses. Energy Efficiency, 11(8), 1955. https://doi.org/10.1007/s12053-018-9653-5
Groh, A., Hunter Kuhlwein, & Bienert, S. (2022). Does Retrofitting Pay Off? An Analysis of German Multifamily Building Data. Journal of Sustainable Real Estate, 14(1), 95–112. https://doi.org/10.1080/19498276.2022.2135188
Gross, R., & Hanna, R. (2019). Path dependency in provision of domestic heating. NATURE ENERGY, 4(5), 358–364. https://doi.org/10.1038/s41560-019-0383-5
Gu, N., & London, K. (2010). Understanding and facilitating BIM adoption in the AEC industry. Automation in Construction, 19(8), 988–999. https://doi.org/10.1016/j.autcon.2010.09.002
Guerra, B., & Leite, F. (2021). Circular economy in the construction industry: An overview of United States stakeholders’ awareness, major challenges, and enablers. RESOURCES CONSERVATION AND RECYCLING, 170. https://doi.org/10.1016/j.resconrec.2021.105617
Gundlach, J., & Stein, E. B. (2020). HARMONIZING STATES’ ENERGY UTILITY REGULATION FRAMEWORKS AND CLIMATE LAWS: A CASE STUDY OF NEW YORK. Energy Law Journal, 41(2), 211–260.
Guo, M., Fu, Y., PhD, Liu, M., PhD, & O’Neill, Z., PhD, PE. (2024). Investigations on the Influence of Model Accuracy in Deep Reinforcement Learning Control for HVAC Applications. ASHRAE Transactions, 130, 570–579.
Hafez, H., El-Mahdy, D., & Marsh, A. (2023). Barriers and enablers for scaled-up adoption of compressed earth blocks in Egypt. BUILDING RESEARCH AND INFORMATION, 51(7), 783–797. https://doi.org/10.1080/09613218.2023.2237133
Haidar, A., Guimón, J., & Martínez, J. (2022). Mainstreaming graphene in electrochemical energy storage devices: A Delphi-based adaptive priority-setting. ENERGY FOR SUSTAINABLE DEVELOPMENT, 71, 279–290. https://doi.org/10.1016/j.esd.2022.10.004
Hailemariam, E., Hailemariam, L., Amede, E., & Nuramo, D. (2023). Identification of barriers, benefits and opportunities of using bamboo materials for structural purposes. ENGINEERING CONSTRUCTION AND ARCHITECTURAL MANAGEMENT, 30(7), 2716–2738. https://doi.org/10.1108/ECAM-11-2021-0996
Hajare, A. (2019). Life Cycle Cost Analysis of an Energy Efficient Residential Unit. ProQuest Dissertations and Theses. https://ezproxy.bu.edu/login?qurl=https://www.proquest.com/docview/2827703667?accountid=9676&bdid=81940&_bd=Hlp5yVtbbgz7jLkxdz%2FF%2FDWU9Is%3D
Hajare, A., & Elwakil, E. (2020). Integration of life cycle cost analysis and energy simulation for building energy-efficient strategies assessment. SUSTAINABLE CITIES AND SOCIETY, 61. https://doi.org/10.1016/j.scs.2020.102293
Hale, S. E., Roque, A. J., Okkenhaug, G., Sørmo, E., Lenoir, T., Carlsson, C., Kupryianchyk, D., Flyhammar, P., & Žlender, B. (2021). The Reuse of Excavated Soils from Construction and Demolition Projects: Limitations and Possibilities. Sustainability, 13(11), 6083. https://doi.org/10.3390/su13116083
Hamed Olfat, Rismanchi, B., Shojaei, D., & Rajabifard, A. (2019). Utilizing a Building Information Modelling Environment to Communicate the Legal Ownership of Internet of Things-Generated Data in Multi-Owned Buildings. Electronics, 8(11), 1258. https://doi.org/10.3390/electronics8111258
Hanus, N., Newkirk, A., & Stratton, H. (2023). Organizational and psychological measures for data center energy efficiency: Barriers and mitigation strategies. Energy Efficiency, 16(1), 1. https://doi.org/10.1007/s12053-022-10078-1
Hanus, N., Wong-Parodi, G., Small, M., & Grossmann, I. (2018). The role of psychology and social influences in energy efficiency adoption. ENERGY EFFICIENCY, 11(2), 371–391. https://doi.org/10.1007/s12053-017-9568-6
Hariri, M. E., & Youssef, T. (2022). Impact of Electricity Pricing Mechanisms on Grid-Interactive Buildings. The Institute of Electrical and Electronics Engineers, Inc. (IEEE) Conference Proceedings. https://doi.org/10.1109/TESC53336.2022.9917257
Harris, N., Shealy, T., Parrish, K., & Granderson, J. (2019). Cognitive barriers during monitoring-based commissioning of buildings. SUSTAINABLE CITIES AND SOCIETY, 46. https://doi.org/10.1016/j.scs.2018.12.017
Hartmann, K., & Palm, J. (2023). The role of thermal energy communities in Germany’s heating transition. FRONTIERS IN SUSTAINABLE CITIES, 4. https://doi.org/10.3389/frsc.2022.1027148
Haselsteiner, E., Rizvanolli, B. V., Paola Villoria Sáez, & Kontovourkis, O. (2021). Drivers and Barriers Leading to a Successful Paradigm Shift toward Regenerative Neighborhoods. Sustainability, 13(9), 5179. https://doi.org/10.3390/su13095179
Hassan, A., Negash, Y., & Hanum, F. (2024). An assessment of barriers to digital transformation in circular Construction: An application of stakeholder theory. AIN SHAMS ENGINEERING JOURNAL, 15(7). https://doi.org/10.1016/j.asej.2024.102787
Hassanain, M., Alamoudi, A., Al-Hammad, A., & Abdallah, A. (2020). Barriers to the implementation of POE practices in the Saudi Arabian building industry. ARCHITECTURAL ENGINEERING AND DESIGN MANAGEMENT, 16(2), 150–165. https://doi.org/10.1080/17452007.2019.1706440
He, W., King, M., Luo, X., Dooner, M., Li, D., & Wang, J. (2021). Technologies and economics of electric energy storages in power systems: Review and perspective. ADVANCES IN APPLIED ENERGY, 4. https://doi.org/10.1016/j.adapen.2021.100060
Heffernan, E., Pan, W., Liang, X., & de Wilde, P. (2015). Zero carbon homes: Perceptions from the UK construction industry. Energy Policy, 79, 23. https://doi.org/10.1016/j.enpol.2015.01.005
Heider, E., & Brockman, C. (2009). BUILDINGS ALIVE! ESTABLISHING THE COST OF LIVING BUILDINGS STRIVING FOR NET ZERO PERFORMANCE. JOURNAL OF GREEN BUILDING, 4(3), 61–71. https://doi.org/10.3992/jgb.4.3.61
Helal, J., Trabucco, D., Ruggiero, D., Miglietta, P., & Perrucci, G. (2024). Embodied Carbon Premium for Cantilevers. Buildings, 14(4), 871. https://doi.org/10.3390/buildings14040871
Hemström, K., Mahapatra, K., & Gustavsson, L. (2017). Architects’ perception of the innovativeness of the Swedish construction industry. Construction Innovation, 17(2), 244–260. https://doi.org/10.1108/CI-06-2015-0038
Herrador, M. (2024). Assessment of the first-ever circular economy framework of Cambodia: Barriers, international opportunities and recommendations. JOURNAL OF CLEANER PRODUCTION, 438. https://doi.org/10.1016/j.jclepro.2024.140778
Herrando, M., & Ramos, A. (2022). Photovoltaic-Thermal (PV-T) Systems for Combined Cooling, Heating and Power in Buildings: A Review. Energies, 15(9), 3021. https://doi.org/10.3390/en15093021
Hirokawa, K. H. (2009). At home with nature: Early reflections on green building laws and the transformation of the built environment. Environmental Law, 39(3), 507–576.
Hodorog, A., Petri, I., Rezgui, Y., & Hippolyte, J. (2021). Building information modelling knowledge harvesting for energy efficiency in the Construction industry. CLEAN TECHNOLOGIES AND ENVIRONMENTAL POLICY, 23(4), 1215–1231. https://doi.org/10.1007/s10098-020-02000-z
Hohmann, B. (2019). Strategies for a sustainable energy transition: The case of the housing sector in Graz, Austria (WOS:000562136800179). 323. https://doi.org/10.1088/1755-1315/323/1/012180
Höjer, M., & Mjörnell, K. (2018). Measures and Steps for More Efficient Use of Buildings. Sustainability, 10(6), 1949. https://doi.org/10.3390/su10061949
Holmes, K., Zeitler, E., Kerxhalli-Kleinfield, M., & DeBoer, R. (2021). Scaling Deep Decarbonization Technologies. EARTHS FUTURE, 9(11). https://doi.org/10.1029/2021EF002399
Honold, A., Lützkendorf, T., & Lohse, R. (2020). Business Models in the context of carbon mitigation: New Questions and Approaches illustrated by the Example of Energy Performance Contracting in Germany. IOP Conference Series. Earth and Environmental Science, 588(2). https://doi.org/10.1088/1755-1315/588/2/022062
Horup, L., Reymann, M., Rørbech, J. T., Ryberg, M., & Birkved, M. (2019). Partially dynamic life cycle assessment of windows indicates potential thermal over-optimization. IOP Conference Series. Earth and Environmental Science, 323(1). https://doi.org/10.1088/1755-1315/323/1/012152
Hosseini, M., Memari, S., Martek, I., Kocaturk, T., Bararzadeh, M., & Arashpour, M. (2024). Dismantling linear lock-ins in the Australian AEC industry: A pathway to a circular economy. SUSTAINABLE DEVELOPMENT. https://doi.org/10.1002/sd.3082
Hou, J., Liu, Y., Wu, Y., Zhou, N., & Feng, W. (2016). Comparative study of commercial building energy-efficiency retrofit policies in four pilot cities in China. ENERGY POLICY, 88, 204–215. https://doi.org/10.1016/j.enpol.2015.10.016
Hoxha, V., & Lecaj, V. (2024). Regulatory barriers to implementing sustainable buildings in Kosovo. PROPERTY MANAGEMENT, 42(2), 293–309. https://doi.org/10.1108/PM-01-2022-0008
Hoyland, S., Kjestveit, K., & Skotnes, R. (2023). Exploring the complexity of hydrogen perception and acceptance among key stakeholders in Norway. INTERNATIONAL JOURNAL OF HYDROGEN ENERGY, 48(21), 7896–7908. https://doi.org/10.1016/j.ijhydene.2022.11.144
Hu, M., & Qiu, Y. (2019). A comparison of building energy codes and policies in the USA, Germany, and China: Progress toward the net-zero building goal in three countries. CLEAN TECHNOLOGIES AND ENVIRONMENTAL POLICY, 21(2), 291–305. https://doi.org/10.1007/s10098-018-1636-x
Hu, X., Wang, C., & Elshkaki, A. (2024). Material-energy Nexus: A systematic literature review. RENEWABLE & SUSTAINABLE ENERGY REVIEWS, 192. https://doi.org/10.1016/j.rser.2023.114217
Huang, P., Zhang, X., Copertaro, B., Saini, P. K., Yan, D., Wu, Y., & Chen, X. (2020). A Technical Review of Modeling Techniques for Urban Solar Mobility: Solar to Buildings, Vehicles, and Storage (S2BVS). Sustainability, 12(17), 7035. https://doi.org/10.3390/su12177035
Huang, Y. (2020). Factors Affecting Residents’ Adoption of Energy-efficient Lighting in Rural Areas of China. IOP Conference Series. Earth and Environmental Science, 495(1). https://doi.org/10.1088/1755-1315/495/1/012016
Hui, F., Ulya, P., Wilson, S., Meyliawati, A., & Aye, L. (2020). Green Buildings in Makassar, Indonesia. In GREEN BUILDING IN DEVELOPING COUNTRIES: POLICY, STRATEGY AND TECHNOLOGY (WOS:000489143800008; pp. 109–127). https://doi.org/10.1007/978-3-030-24650-1_610.1007/978-3-030-24650-1
Huong, Q., Lou, E., & Le Hoai, N. (2021). Enhancing BIM Diffusion through Pilot Projects in Vietnam. ENGINEERING JOURNAL-THAILAND, 25(7), 167–176. https://doi.org/10.4186/ej.2021.25.7.167
Hurlimann, A., Browne, G., Warren-Myers, G., & Francis, V. (2018). Barriers to climate change adaptation in the Australian construction industry—Impetus for regulatory reform. BUILDING AND ENVIRONMENT, 137, 235–245. https://doi.org/10.1016/j.buildenv.2018.04.015
Husgafvel, R., & Sakaguchi, D. (2022). Circular Economy Development in the Construction Sector in Japan. WORLD, 3(1), 1–26. https://doi.org/10.3390/world3010001
Hussain, B., Ali Naqvi, S. A., & Anwar, S. (2023). Analyzing the Impact of Critical Barriers on the Stakeholder’s Adoption Behavior toward Green Building Technologies in Pakistan. International Journal of Management Research and Emerging Science, 13(1). https://doi.org/10.56536/ijmres.v13i1.371
Hwang, B., Shan, M., & Lye, J. (2018). Adoption of sustainable construction for small contractors: Major barriers and best solutions. CLEAN TECHNOLOGIES AND ENVIRONMENTAL POLICY, 20(10), 2223–2237. https://doi.org/10.1007/s10098-018-1598-z
IEEE, Alizadehsalehi, S., Hadavi, A., & Huang, J. (2019). BIM/MR-Lean Construction Project Delivery Management System (WOS:000589702100010). 2019 IEEE TECHNOLOGY & ENGINEERING MANAGEMENT CONFERENCE (TEMSCON). https://doi.org/10.1109/temscon.2019.8813574
IEEE, Lukasser, G., Estaji, A., Sauter, T., Wilker, S., Kobelrausch, M., Leibold, J., & Sengl, D. (2022). Integrating Photovoltaics and Sun Blinds for Smart Shading Systems (WOS:000946662000154). 990–993. https://doi.org/10.1109/ISIE51582.2022.9831737
Ielegems, E., Herssens, J., Nuyls, E., & Vanrie, J. (2019). DRIVERS AND BARRIERS FOR UNIVERSAL DESIGNING: A SURVEY ON ARCHITECTS’ PERCEPTIONS. JOURNAL OF ARCHITECTURAL AND PLANNING RESEARCH, 36(3), 181–197.
Ilgın, H. E., Saviharju, A., Karjalainen, M., & Hirvilammi, T. (2024). Life Cycle Assessment of an Office Building in Finland Using a Custom Assessment Tool. Buildings, 14(7), 1944. https://doi.org/10.3390/buildings14071944
Ince, R. N. (2015). Urban Retrofit: Pressures, Policy and People in Domestic Retrofit at the City Level. PQDT - Global. https://ezproxy.bu.edu/login?qurl=https://www.proquest.com/docview/2566020949?accountid=9676&bdid=77468&_bd=rOV8txljL8PUqMk%2BixHhZzNoHs8%3D
IOP Publishing, Kamaruddin, T., Hamid, R., & Abd Ghani, S. (2020). Social aspect implementation in sustainable construction (WOS:000594080900036). 849. https://doi.org/10.1088/1757-899X/849/1/012036
IOP, Jamaludin, S., Hamid, S., & Noor, S. (2020). Assessing the Challenges of Integration Affordable and Sustainable Housing from Economic Perspectives (WOS:000614604800089). 498. https://doi.org/10.1088/1755-1315/498/1/012089
IOP, Ng, L., Tan, L., & Seow, T. (2018). Constraints to 3R construction waste reduction among contractors in Penang (WOS:000454977100103). 140. https://doi.org/10.1088/1755-1315/140/1/012103
IOP, Polychroni, E., & Androutsopoulos, A. (2020). Innovative financial schemes for buildings’ energy renovation (WOS:000538681000055). 410. https://doi.org/10.1088/1755-1315/410/1/012055
IOP, Suhaida, M., Tan, K., & Leong, Y. (2013). Green buildings in Malaysia towards greener environment: Challenges for policy makers (WOS:000322788100121). 16. https://doi.org/10.1088/1755-1315/16/1/012121
Iqbal, M., Ma, J., Ahmad, N., Hussain, K., Usmani, M., & Ahmad, M. (2021). Sustainable construction through energy management practices in developing economies: An analysis of barriers in the construction sector. ENVIRONMENTAL SCIENCE AND POLLUTION RESEARCH, 28(26), 34793–34823. https://doi.org/10.1007/s11356-021-12917-7
Iqbal, M., Ma, J., Ahmad, N., Ullah, Z., & Ahmed, R. (2021). Uptake and Adoption of Sustainable Energy Technologies: Prioritizing Strategies to Overcome Barriers in the Construction Industry by Using an Integrated AHP-TOPSIS Approach. ADVANCED SUSTAINABLE SYSTEMS, 5(7). https://doi.org/10.1002/adsu.202100026
Italian Architectural Heritage and Photovoltaic Systems. Matching Style with Sustainability. (2021). Sustainability, 13(4), 2108. https://doi.org/10.3390/su13042108
Izaola, B., Akizu-Gardoki, O., & Oregi, X. (2022). Life Cycle Analysis Challenges through Building Rating Schemes within the European Framework. Sustainability, 14(9), 5009. https://doi.org/10.3390/su14095009
Jack, M., Mirfin, A., & Anderson, B. (2021). The role of highly energy-efficient dwellings in enabling 100% renewable electricity. ENERGY POLICY, 158. https://doi.org/10.1016/j.enpol.2021.112565
Jahangir, M., Mokhtari, R., Salmanpour, F., & Yousefi, H. (2024). Urban energy planning towards achieving an economically and environmentally optimized energy flow by 2050 based on different scenarios (a case study). ENVIRONMENT DEVELOPMENT AND SUSTAINABILITY. https://doi.org/10.1007/s10668-024-04754-8
Jahed, N., Aktaş, Y. D., Rickaby, P., & Ayşe Güliz Bilgin Altınöz. (2020). Policy Framework for Energy Retrofitting of Built Heritage: A Critical Comparison of UK and Turkey. Atmosphere, 11(6), 674. https://doi.org/10.3390/atmos11060674
Jalilzadehazhari, E., & Kurkinen, E.-L. (2022). Drivers and barrios in using augmented reality in renovation projects—Literature review. E3S Web of Conferences, 362, n/a. https://doi.org/10.1051/e3sconf/202236207002
Janhunen, E., & Junnila, S. (2022). The contribution of smart buildings to low-carbon built environment. IOP Conference Series. Earth and Environmental Science, 1101(2), 022010. https://doi.org/10.1088/1755-1315/1101/2/022010
Jansen, B. W., Jin-Ah Duijghuisen, Gerard van Bortel, & Gruis, V. (2023). Comparing Circular Kitchens: A Study of the Dutch Housing Sector. Buildings, 13(7), 1698. https://doi.org/10.3390/buildings13071698
Jayalath, A., Navaratnam, S., Gunawardena, T., Mendis, P., & Aye, L. (2021). Airborne and impact sound performance of modern lightweight timber buildings in the Australian construction industry. CASE STUDIES IN CONSTRUCTION MATERIALS, 15. https://doi.org/10.1016/j.cscm.2021.e00632
Jayawardana, J., Sandanayake, M., Jayasinghe, S., Kulatunga, A., & Zhang, G. (2024). Key barriers and mitigation strategies towards sustainable prefabricated construction—A case of developing economies. ENGINEERING CONSTRUCTION AND ARCHITECTURAL MANAGEMENT. https://doi.org/10.1108/ECAM-09-2023-0978
Jayaweera, R., Nop, S., Karagianni, C., Waibel, M., & Schwede, D. (2022). Sustainable building arenas: Constructing a governance framework for a sustainability transition in Cambodia’s urban built environment. IOP Conference Series. Earth and Environmental Science, 1078(1), 012084. https://doi.org/10.1088/1755-1315/1078/1/012084
Jiang, H., Yao, R., Han, S., Du, C., Yu, W., Chen, S., Li, B., Yu, H., Li, N., Peng, J., & Li, B. (2020). How do urban residents use energy for winter heating at home? A large-scale survey in the hot summer and cold winter climate zone in the Yangtze River region. ENERGY AND BUILDINGS, 223. https://doi.org/10.1016/j.enbuild.2020.110131
Jing, K., Qing, C., & Yee, H. (2023). Readiness of Malaysian on Sustainable Development in Solar Energy Application. INTERNATIONAL JOURNAL OF SUSTAINABLE CONSTRUCTION ENGINEERING AND TECHNOLOGY, 14(1), 189–201. https://doi.org/10.30880/ijscet.2023.14.01.017
John Kaiser Calautit, & Hughes, B. R. (2016). Sustainable Buildings: Opportunities, challenges, aims and vision. Sustainable Buildings, 1, n/a. https://doi.org/10.1051/sbuild/2016001
Juan, Y.-K., Lai, W.-Y., & Shih, S.-G. (2017). Building information modeling acceptance and readiness assessment in Taiwanese architectural firms. Journal of Civil Engineering and Management, 23(3), 356–367. https://doi.org/10.3846/13923730.2015.1128480
Kachirayil, F., Weinand, J., Scheller, F., & McKenna, R. (2022). Reviewing local and integrated energy system models: Insights into flexibility and robustness challenges. APPLIED ENERGY, 324. https://doi.org/10.1016/j.apenergy.2022.119666
Kaewunruen, S., Teuffel, P., Cavdar, A., Valta, O., Tambovceva, T., & Bajare, D. (2024). Comparisons of stakeholders’ influences, inter-relationships, and obstacles for circular economy implementation on existing building sectors. SCIENTIFIC REPORTS, 14(1). https://doi.org/10.1038/s41598-024-61863-0
Kamranfar, S., Azimi, Y., Gheibi, M., Fathollahi-Fard, A., & Hajiaghaei-Keshteli, M. (2022). Analyzing Green Construction Development Barriers by a Hybrid Decision-Making Method Based on DEMATEL and the ANP. BUILDINGS, 12(10). https://doi.org/10.3390/buildings12101641
Kamranfar, S., Damirchi, F., Pourvaziri, M., Xalikovich, P., Mahmoudkelayeh, S., Moezzi, R., & Vadiee, A. (2023). A Partial Least Squares Structural Equation Modelling Analysis of the Primary Barriers to Sustainable Construction in Iran. SUSTAINABILITY, 15(18). https://doi.org/10.3390/su151813762
Kanai, J., Fabio, V., Miras, M., & Gastiarena, L. (2024). Making Green Heritage Schools Work: Nature-Based Solutions and Historical Preservation When Infrastructure Fails. SUSTAINABILITY, 16(16). https://doi.org/10.3390/su16166981
Kang, J., Hao, B., Li, Y., Lin, H., & Xue, Z. (2022). The Application and Development of LVDC Buildings in China. ENERGIES, 15(19). https://doi.org/10.3390/en15197045
Kanyilmaz, A., Birhane, M., Fishwick, R., & del Castillo, C. (2023). Reuse of Steel in the Construction Industry: Challenges and Opportunities. INTERNATIONAL JOURNAL OF STEEL STRUCTURES, 23(5), 1399–1416. https://doi.org/10.1007/s13296-023-00778-4
Karlsson, I., Rootzén, J., Toktarova, A., Odenberger, M., Johnsson, F., & Göransson, L. (2020). Roadmap for Decarbonization of the Building and Construction Industry—A Supply Chain Analysis Including Primary Production of Steel and Cement. Energies, 13(16), 4136. https://doi.org/10.3390/en13164136
Kashkash, S., Czoboly, O., & Orban, Z. (2023). Effect of Moisture Condition and the Composition of Aggregate from Demolition Waste on Strength and Workability Properties of Recycled Concrete. Buildings, 13(7), 1870. https://doi.org/10.3390/buildings13071870
Katerusha, D. (2021). Barriers to the use of recycled concrete from the perspective of executing companies and possible solution approaches—Case study Germany and Switzerland. Resources Policy, 73, 1. https://doi.org/10.1016/j.resourpol.2021.102212
Kazemi, M., & Kazemi, A. (2022). Financial barriers to residential buildings’ energy efficiency in Iran. ENERGY EFFICIENCY, 15(5). https://doi.org/10.1007/s12053-022-10039-8
Kazemi, M., & Udall, J. (2023). Behavioral barriers to the use of renewable and energy-efficient technologies in residential buildings in Iran. ENERGY EFFICIENCY, 16(7). https://doi.org/10.1007/s12053-023-10162-0
Ke, Z., Zhang, H., Jia, X., Yan, J., Lv, X., Yu, H., Gao, N., Zeng, W., Liu, Y., & Wong, N. (2024). Research on energy efficiency and decarbonization pathway of nearly zero energy buildings based on system dynamic simulation. DEVELOPMENTS IN THE BUILT ENVIRONMENT, 17. https://doi.org/10.1016/j.dibe.2023.100310
Kelly, N., Edkins, A. J., Smyth, H., & Konstantinou, E. (2013). Reinventing the role of the project manager in mobilising knowledge in construction. International Journal of Managing Projects in Business, 6(4), 654. https://doi.org/10.1108/IJMPB-12-2011-0080
Kesidou, S., & Sorrell, S. (2018). Low-carbon innovation in non-domestic buildings: The importance of supply chain integration. ENERGY RESEARCH & SOCIAL SCIENCE, 45, 195–213. https://doi.org/10.1016/j.erss.2018.07.018
Keskin, F. S. (2021). Integration of Lifecycle Assessment into Structural Intervention Scenarios for Assessing Environmental Impacts of Vulnerable Buildings. PQDT - UK & Ireland. https://ezproxy.bu.edu/login?qurl=https://www.proquest.com/docview/2796568324?accountid=9676&bdid=81940&_bd=h4LLxRmQC5TWd0JqyLPt%2BteQU2w%3D
Khaba, S., & Bhar, C. (2017). Modeling the key barriers to lean construction using interpretive structural modeling. Journal of Modelling in Management, 12(4), 652–670. https://doi.org/10.1108/JM2-07-2015-0052
Khafiso, T., Aigbavboa, C., & Adekunle, S. (2024). Barriers to the adoption of energy management systems in residential buildings. FACILITIES, 42(15/16), 107–125. https://doi.org/10.1108/F-12-2023-0113
Khalid, Y., Ngwaka, U., Papworth, J., Ling-Chin, J., & Smallbone, A. (2023). Evaluation of decarbonisation options for heritage church buildings. JOURNAL OF BUILDING ENGINEERING, 77. https://doi.org/10.1016/j.jobe.2023.107462
Khalil, A. (2018). Developing a Strategy for the Implementation of Sustainable Construction Practices in Libya. PQDT - UK & Ireland. https://ezproxy.bu.edu/login?qurl=https://www.proquest.com/docview/2342402186?accountid=9676&bdid=81940&_bd=O5RA6wHVqlTO1HMdfRZqqTQmr%2FQ%3D
Khalil, A., Rathnasinghe, A., & Kulatunga, U. (2021). Challenges for the Implementation of Sustainable Construction Practices in Libya. CONSTRUCTION ECONOMICS AND BUILDING, 21(3), 243–261. https://doi.org/10.5130/AJCEB.v21i3.7647
Khan, M., Dani, A. A., Lim, J. B. P., & Roy, K. (2024). Appraising the Feasibility of 3D Printing Construction in New Zealand Housing. Buildings, 14(4), 1084. https://doi.org/10.3390/buildings14041084
Khozema Ahmed Ali, Ahmad, M. I., & Yusup, Y. (2020). Issues, Impacts, and Mitigations of Carbon Dioxide Emissions in the Building Sector. Sustainability, 12(18), 7427. https://doi.org/10.3390/su12187427
Kim, K. P. (2020). Cloud-BIM Enabled Cyber-Physical Data and Service Platforms for Building Component Reuse. Sustainability, 12(24), 10329. https://doi.org/10.3390/su122410329
Klöckner, C. A., & Nayum, A. (2017). Psychological and structural facilitators and barriers to energy upgrades of the privately owned building stock. Energy, 140, 1005.
Knoeri, C., Schwarz, M., & Nakhle, C. (2019). Energy transition and technical energy regulations in the building sector. IOP Conference Series. Earth and Environmental Science, 323(1). https://doi.org/10.1088/1755-1315/323/1/012181
Kordana-Obuch, S., Starzec, M., Wojtoń, M., & Słyś, D. (2023). Greywater as a Future Sustainable Energy and Water Source: Bibliometric Mapping of Current Knowledge and Strategies. Energies, 16(2), 934. https://doi.org/10.3390/en16020934
Koster, G., van Sark, W., & Ricker, B. (2024). Solar potential for social benefit: Maps to sustainably address energy poverty utilizing open spatial data in data poor settings. ENERGY FOR SUSTAINABLE DEVELOPMENT, 80. https://doi.org/10.1016/j.esd.2024.101453
Koutra, S., Terés-Zubiaga, J., Bouillard, P., & Becue, V. (2023). “Decarbonizing Europe” A critical review on positive energy districts approaches. SUSTAINABLE CITIES AND SOCIETY, 89. https://doi.org/10.1016/j.scs.2022.104356
Kozminska, U. (2019). Circular design: Reused materials and the future reuse of building elements in architecture. Process, challenges and case studies. IOP Conference Series. Earth and Environmental Science, 225(1). https://doi.org/10.1088/1755-1315/225/1/012033
KPMG’s Singapore Budget 2022 proposal highlights ESG, global tax and enterprise support measures to build lasting companies on a fragile planet. (2022). LiveNews.Co.Nz. https://ezproxy.bu.edu/login?qurl=https://www.proquest.com/docview/2644775334?accountid=9676&bdid=77468&_bd=8QYkGez%2Boy1KL4k7hWSrUKBZuEI%3D
Krueger, K., Stoker, A., & Gaustad, G. (2019). “Alternative” materials in the green building and construction sector; Examples, barriers, and environmental analysis. Smart and Sustainable Built Environment, 8(4), 270–291. https://doi.org/10.1108/SASBE-09-2018-0045
Kudirat Olabisi Ayinla, & Adamu, Z. (2018). Bridging the digital divide gap in BIM technology adoption. Engineering, Construction and Architectural Management, 25(10), 1398–1416. https://doi.org/10.1108/ECAM-05-2017-0091
Kuppusamy, S., Chew, H., Mari, T., & Chai, C. (2019). Implementation of green building materials in construction industry in Johor Bahru, Malaysia (WOS:000493910800006). 268. https://doi.org/10.1088/1755-1315/268/1/012006
Kusuma, B., Soemardi, B. W., Pribadi, K. S., & Yuliar, S. (2019). Indonesian contractor technological learning mechanism and its considerations. IOP Conference Series. Materials Science and Engineering, 650(1). https://doi.org/10.1088/1757-899X/650/1/012001
Lam, P. T., & YU, J. S. (2016). Developing and managing photovoltaic facilities based on third-party ownership business models in buildings. Facilities, 34(13/14), 855–872. https://doi.org/10.1108/F-04-2015-0019
Langston, C., & Zhang, W. (2021). DfMA: Towards an Integrated Strategy for a More Productive and Sustainable Construction Industry in Australia. SUSTAINABILITY, 13(16). https://doi.org/10.3390/su13169219
Larrea-Sáez, L., Muñoz, E., Cuevas, C., & Casas-Ledón, Y. (2024). Optimizing insulation and heating systems for social housing in Chile: Insights for sustainable energy policies. ENERGY, 290. https://doi.org/10.1016/j.energy.2023.130024
Lassandro, P., Devitofrancesco, A., Bellazzi, A., Cascardi, A., De Aloysio, G., Laghi, L., & Malvezzi, R. (2024). Facing the Constraints to the Deep Energy Renovation Process of Residential Built Stock in European Markets. SUSTAINABILITY, 16(1). https://doi.org/10.3390/su16010294
Latha, H., Patil, S., & Kini, P. G. (2023). Influence of architectural space layout and building perimeter on the energy performance of buildings: A systematic literature review. International Journal of Energy and Environmental Engineering, 14(3), 431–474. https://doi.org/10.1007/s40095-022-00522-4
Lavikka, R., Chauhan, K., Peltokorpi, A., & Seppänen, O. (2021). Value creation and capture in systemic innovation implementation: Case of mechanical, electrical and plumbing prefabrication in the Finnish construction sector. CONSTRUCTION INNOVATION-ENGLAND, 21(4), 837–856. https://doi.org/10.1108/CI-05-2020-0070
Le Dréau, J., Lopes, R., ’Connell, S., Finn, D., Hu, M., Queiroz, H., Alexander, D., Satchwell, A., Österreicher, D., Polly, B., Arteconi, A., Pereira, F., Hall, M., Kirant-Mitic, T., Cai, H., Johra, H., Kazmi, H., Li, R., Liu, A., … Saeed, M. (2023). Developing energy flexibility in clusters of buildings: A critical analysis of barriers from planning to operation. ENERGY AND BUILDINGS, 300. http…
Le, A., Navodana Rodrigo, Niluka Domingo, & Senaratne, S. (2023). Policy Mapping for Net-Zero-Carbon Buildings: Insights from Leading Countries. Buildings, 13(11), 2766. https://doi.org/10.3390/buildings13112766
Le, D., Salomone, R., Nguyen, Q., Versele, A., & Piccardo, C. (2024). Status and barriers to circular bio-based building material adoption in developed economies: The case of Flanders, Belgium. JOURNAL OF ENVIRONMENTAL MANAGEMENT, 367. https://doi.org/10.1016/j.jenvman.2024.121965
Leal, W., Fedoruk, M., Zahvoyska, L., & Avila, L. (2021). Identifying and Comparing Obstacles and Incentives for the Implementation of Energy Saving Projects in Eastern and Western European Countries: An Exploratory Study. SUSTAINABILITY, 13(9). https://doi.org/10.3390/su13094944
Leerbeck, K., Bacher, P., Grønborg, R., Tveit, A., Corradi, O., & Madsen, H. (2020). Control of heat pumps with CO2 emission intensity forecasts. arXiv.Org, n/a.
Leite, F., Cho, Y., Behzadan, A., Lee, S., Choe, S., Fang, Y., Akhavian, R., & Hwang, S. (2016). Visualization, Information Modeling, and Simulation: Grand Challenges in the Construction Industry. JOURNAL OF COMPUTING IN CIVIL ENGINEERING, 30(6). https://doi.org/10.1061/(ASCE)CP.1943-5487.0000604
Leoto, R., & Lizarralde, G. (2019). Challenges in evaluating strategies for reducing a building’s environmental impact through Integrated Design. BUILDING AND ENVIRONMENT, 155, 34–46. https://doi.org/10.1016/j.buildenv.2019.03.041
Lesnyak, E., Belkot, T., Hurka, J., Hörding, J. P., Kuhlmann, L., Paulau, P., Schnabel, M., Schönfeldt, P., & Middelberg, J. (2023). Applied Digital Twin Concepts Contributing to Heat Transition in Building, Campus, Neighborhood, and Urban Scale. Big Data and Cognitive Computing, 7(3), 145. https://doi.org/10.3390/bdcc7030145
Less, B., Casquero-Modrego, N., & Walker, I. (2022). Home Energy Upgrades as a Pathway to Home Decarbonization in the US: A Literature Review. ENERGIES, 15(15). https://doi.org/10.3390/en15155590
Levesque, A., Pietzcker, R., Baumstark, L., & Luderer, G. (2021). Deep decarbonisation of buildings energy services through demand and supply transformations in a 1.5°C scenario. ENVIRONMENTAL RESEARCH LETTERS, 16(5). https://doi.org/10.1088/1748-9326/abdf07
Li, F. G., Trutnevyte, E., & Strachan, N. (2015). A review of socio-technical energy transition (STET) models. Technological Forecasting and Social Change, 100, 290. https://doi.org/10.1016/j.techfore.2015.07.017
Li, J., & Colombier, M. (2009). Managing carbon emissions in China through building energy efficiency. JOURNAL OF ENVIRONMENTAL MANAGEMENT, 90(8), 2436–2447. https://doi.org/10.1016/j.jenvman.2008.12.015
Li, J., & Gou, Z. (2024). Addressing the development gap in net-zero energy buildings: A comparative study of China, India, and the United States. ENERGY FOR SUSTAINABLE DEVELOPMENT, 79. https://doi.org/10.1016/j.esd.2024.101418
Li, J., Zhang, J., Liu, C., & Luo, X. (2023). What hinders the implementation of carbon emission reduction in the construction industry: Evidence from integrated multi-criteria decision-making in China. ENGINEERING CONSTRUCTION AND ARCHITECTURAL MANAGEMENT. https://doi.org/10.1108/ECAM-05-2023-0511
Li, R., Satchwell, A., Finn, D., Christensen, T., Kummert, M., Le Dréau, J., Lopes, R., Madsen, H., Salom, J., Henze, G., & Wittchen, K. (2022). Ten questions concerning energy flexibility in buildings. BUILDING AND ENVIRONMENT, 223. https://doi.org/10.1016/j.buildenv.2022.109461
Li, S., Zhou, C., & Wang, S. (2019). Does modernization affect carbon dioxide emissions? A panel data analysis. SCIENCE OF THE TOTAL ENVIRONMENT, 663, 426–435. https://doi.org/10.1016/j.scitotenv.2019.01.373
Li, T., Shapiro, M., Heidarinejad, M., & Stephens, B. (2024). Ten questions concerning building electrification. BUILDING AND ENVIRONMENT, 261. https://doi.org/10.1016/j.buildenv.2024.111653
Li, Y., Liu, Z., & Li, C. (2022). OVERVIEW OF GOVERNMENT STRATEGIES ON GREEN BUILDING IN SINGAPORE. JOURNAL OF GREEN BUILDING, 17(4), 219–241.
Li, Y., Zhu, N., & Qin, B. (2019). Major Barriers to the New Residential Building Energy-Efficiency Promotion in China: Frontlines’ Perceptions. ENERGIES, 12(6). https://doi.org/10.3390/en12061073
Liao, H., Ren, R., & Lu, L. (2023). Existing Building Renovation: A Review of Barriers to Economic and Environmental Benefits. International Journal of Environmental Research and Public Health, 20(5), 4058. https://doi.org/10.3390/ijerph20054058
Likita, A., Jelodar, M., Vishnupriya, V., Rotimi, J., & Vilasini, N. (2022). Lean and BIM Implementation Barriers in New Zealand Construction Practice. BUILDINGS, 12(10). https://doi.org/10.3390/buildings12101645
Lim, B., Liu, A., & Oo, B. (2019). Awareness and Practices of Sustainable Construction in Australia: Consultant Quantity Surveyors’ Perception (WOS:000524614000060). 2124. https://doi.org/10.1063/1.5117120
Liu, B., Yang, H., & Bai, Y. (2024). Barriers to the Development of The Industrialized House Building in China. The Institute of Electrical and Electronics Engineers, Inc. (IEEE) Conference Proceedings. https://doi.org/10.1109/ICIT58233.2024.10540956
Liu, C., Sharples, S., & Mohammadpourkarbasi, H. (2023). A Review of Building Energy Retrofit Measures, Passive Design Strategies and Building Regulation for the Low Carbon Development of Existing Dwellings in the Hot Summer–Cold Winter Region of China. Energies, 16(10), 4115. https://doi.org/10.3390/en16104115
Liu, D. (2013). CSR and Sustainability in the Building and Construction Industry: Green Lease Case Study. ProQuest Dissertations and Theses. https://ezproxy.bu.edu/login?qurl=https://www.proquest.com/docview/1530436508?accountid=9676&bdid=81940&_bd=ltquWy0rcVBYuDFrUzu5CJyOpbc%3D
Liu, G., Li, X., Tan, Y., & Zhang, G. (2020). Building green retrofit in China: Policies, barriers and recommendations. ENERGY POLICY, 139. https://doi.org/10.1016/j.enpol.2020.111356
Liu, J., Wu, P., Jiang, Y., & Wang, X. (2021). Explore potential barriers of applying circular economy in construction and demolition waste recycling. JOURNAL OF CLEANER PRODUCTION, 326. https://doi.org/10.1016/j.jclepro.2021.129400
Liu, Z., Yu, C., Qian, Q., Huang, R., You, K., Visscher, H., & Zhang, G. (2023). Incentive initiatives on energy-efficient renovation of existing buildings towards carbon-neutral blueprints in China: Advancements, challenges and prospects. ENERGY AND BUILDINGS, 296. https://doi.org/10.1016/j.enbuild.2023.113343
Lotz, M. T., Barkhausen, R., Herbst, A., Pfaff, M., Durand, A., & Rehfeldt, M. (2022). Potentials and Prerequisites on the Way to a Circular Economy: A Value Chain Perspective on Batteries and Buildings. Sustainability, 14(2), 956. https://doi.org/10.3390/su14020956
Lucchi, E. (2022). Integration between photovoltaic systems and cultural heritage: A socio-technical comparison of international policies, design criteria, applications, and innovation developments. Energy Policy, 171, 113303.
Lucchi, E. (2022). Integration between photovoltaic systems and cultural heritage: A socio-technical comparison of international policies, design criteria, applications, and innovation developments. ENERGY POLICY, 171. https://doi.org/10.1016/j.enpol.2022.113303
Lucchi, E., Baiani, S., & Altamura, P. (2023). Design criteria for the integration of active solar technologies in the historic built environment: Taxonomy of international recommendations. ENERGY AND BUILDINGS, 278. https://doi.org/10.1016/j.enbuild.2022.112651
Ludwig, G. (2019). The Role of Law in Transformative Environmental PoliciesA Case Study of “Timber in Buildings Construction in Germany.” SUSTAINABILITY, 11(3). https://doi.org/10.3390/su11030842
Lund, H., Jakob Zinck Thellufsen, Aggerholm, S., Wittchen, K. B., Nielsen, S., Brian Vad Mathiesen, & Möller, B. (2014). Heat Saving Strategies in Sustainable Smart Energy Systems. International Journal of Sustainable Energy Planning and Management, 4, 3. https://doi.org/10.5278/ijsepm.2014.4.2
Luo, T., Xue, X., Wang, Y., Xue, W., & Tan, Y. (2021). A systematic overview of prefabricated construction policies in China. JOURNAL OF CLEANER PRODUCTION, 280. https://doi.org/10.1016/j.jclepro.2020.124371
Lygnerud, K., Klugman, S., Fransson, N., & Nilsson, J. (2022). Risk assessment of industrial excess heat collaborations e Empirical data from new and ongoing installations. ENERGY, 255. https://doi.org/10.1016/j.energy.2022.124452
Lynch, H. (2014). Passivhaus in the UK : the challenges of an emerging market: A case study of innovation using mixed methods research. PQDT - UK & Ireland. https://ezproxy.bu.edu/login?qurl=https://www.proquest.com/docview/2351328288?accountid=9676&bdid=81940&_bd=%2BR%2FIrL3UOd9gJHMw%2BiMZCYbnPKg%3D
Lynch, N. (2022). Unbuilding the city: Deconstruction and the circular economy in Vancouver. ENVIRONMENT AND PLANNING A-ECONOMY AND SPACE, 54(8), 1586–1603. https://doi.org/10.1177/0308518X221116891
Ma, M., Tam, V. W. Y., Le, K. N., & Li, W. (2020). Challenges in current construction and demolition waste recycling: A China study. Waste management (New York, N.Y.), 118, 610–625. https://doi.org/10.1016/j.wasman.2020.09.030
Ma, S. (2024). SUSTAINABLE HOUSING DEVELOPMENT IN CHINA: DOES FINANCIAL INSTITUTIONS OVERCOME THE RISKS AND CHALLENGES TO SUSTAINABLE HOUSING? TECHNOLOGICAL AND ECONOMIC DEVELOPMENT OF ECONOMY, 30(3), 627–645. https://doi.org/10.3846/tede.2024.20581
Mac Uidhir, T., Rogan, F., Collins, M., Curtis, J., & Gallachóir, B. (2020). Improving energy savings from a residential retrofit policy: A new model to inform better retrofit decisions. ENERGY AND BUILDINGS, 209. https://doi.org/10.1016/j.enbuild.2019.109656
MacLaren, V., & Ikiz, E. (2022). Meeting urban GHG reduction goals with waste diversion: Multi-residential buildings. Buildings & Cities, 3(1), 1042. https://doi.org/10.5334/bc.277
Madadizadeh, A., Siddiqui, K., & Aliabadi, A. A. (2024). Review: The Economics Landscape for Building Decarbonization. Sustainability, 16(14), 6214. https://doi.org/10.3390/su16146214
Mahmod, A., Mohd, S., Masirin, M., Tajudin, S., Bakar, I., Zainorabidin, A., Kifli, A., & Hua, L. (2016). Construction of Buildings on Peat: Case Studies and Lessons Learned (WOS:000387756300053). 47. https://doi.org/10.1051/matecconf/20164703013
Mahmoodi, M., Rasheed, E., & Le, A. (2024). Systematic Review on the Barriers and Challenges of Organisations in Delivering New Net Zero Emissions Buildings. Buildings, 14(6), 1829. https://doi.org/10.3390/buildings14061829
Mahpour, A. (2018). Prioritizing barriers to adopt circular economy in construction and demolition waste management. RESOURCES CONSERVATION AND RECYCLING, 134, 216–227. https://doi.org/10.1016/j.resconrec.2018.01.026
Maia, I., Kranzl, L., & Müller, A. (2021). New step-by-step retrofitting model for delivering optimum timing. APPLIED ENERGY, 290. https://doi.org/10.1016/j.apenergy.2021.116714
Malla, V., Prasad, K., & Delhi, V. (2024). Analysing inhibitors to BIM implementation: A social network theoretical perspective. CONSTRUCTION INNOVATION-ENGLAND. https://doi.org/10.1108/CI-06-2023-0128
Mamter, S., Abdul-Aziz, A. R., & Mamat, M. (2017). Stimulating a Sustainable Construction through Holistic BIM Adoption: The Root Causes of Recurring Low BIM Adoption in Malaysia. IOP Conference Series. Materials Science and Engineering, 216(1). https://doi.org/10.1088/1757-899X/216/1/012056
Mangan, S. D. (2023). A Performance-Based Decision Support Workflow for Retrofitting Residential Buildings. Sustainability, 15(3), 2567. https://doi.org/10.3390/su15032567
Maniak-Huesser, M., Tellnes, L., & Escamilla, E. (2021). Mind the Gap: A Policy Gap Analysis of Programmes Promoting Timber Construction in Nordic Countries. SUSTAINABILITY, 13(21). https://doi.org/10.3390/su132111876
Mao, C., Shen, Q., Pan, W., & Ye, K. (2015). Major Barriers to Off-Site Construction: The Developer’s Perspective in China. JOURNAL OF MANAGEMENT IN ENGINEERING, 31(3). https://doi.org/10.1061/(ASCE)ME.1943-5479.0000246
Wuni, I. Y. (2022). Mapping the barriers to circular economy adoption in the construction industry: A systematic review, Pareto analysis, and mitigation strategy map. Building and Environment, 223, 109453.
Maqsood, T., Wong, P. S., Malik Khalfan, & Yang, R. J. (2021). Extended Producer Responsibility in the Australian Construction Industry. Sustainability, 13(2), 620. https://doi.org/10.3390/su13020620
Maqsoom, A., Zulqarnain, M., Irfan, M., Ullah, F., Alqahtani, F., & Khan, K. (2023). Drivers of, and Barriers to, the Adoption of Mixed Reality in the Construction Industry of Developing Countries. BUILDINGS, 13(4). https://doi.org/10.3390/buildings13040872
Marco Lamperti Tornaghi, Loli, A., & Negro, P. (2018). Balanced Evaluation of Structural and Environmental Performances in Building Design. Buildings, 8(4), 52. https://doi.org/10.3390/buildings8040052
Marhani, M., & Muksain, M. (2018). GBI assessment checklist: Level of awareness of the contractors in the Malaysian construction industry (WOS:000445893500024). 117. https://doi.org/10.1088/1755-1315/117/1/012024
Markel Arbulu, Perez-Bezos, S., Figueroa-Lopez, A., & Oregi, X. (2024). Opportunities and Barriers of Calibrating Residential Building Performance Simulation Models Using Monitored and Survey-Based Occupant Behavioural Data: A Case Study in Northern Spain. Buildings, 14(7), 1911. https://doi.org/10.3390/buildings14071911
Marszal-Pomianowska, A., Motoasca, E., Pothof, I., Felsmann, C., Heiselberg, P., Cadenbach, A., Leusbrock, I., ’Donovan, K., Petersen, S., & Schaffer, M. (2024). Strengths, weaknesses, opportunities and threats of demand response in district heating and cooling systems. From passive customers to valuable assets. SMART ENERGY, 14. https://doi.org/10.1016/j.segy.2024.100135
Martin, H., Chebrolu, D., Chadee, A., & Brooks, T. (2024). Too good to waste: Examining circular economy opportunities, barriers, and indicators for sustainable construction and demolition waste management. SUSTAINABLE PRODUCTION AND CONSUMPTION, 48, 460–480. https://doi.org/10.1016/j.spc.2024.05.026
Martin, J., & Samels, J. E. (2012). The Sustainable University; Green Goals and New Challenges for Higher Education Leaders. The Sustainable University. https://ezproxy.bu.edu/login?qurl=https://www.proquest.com/docview/2131353040?accountid=9676&bdid=77468&_bd=PsjKy9eEHsdeH48%2Fx10JH5bLPkg%3D
Martín-Consuegra, F., Ludueña, C. A., De Frutos, F., Frutos, B., Alonso, C., & Oteiza, I. (2024). Expectations and Outcomes when Quantifying Energy Improvements Achieved by Building Envelope Retrofitting. Sustainability, 16(8), 3214. https://doi.org/10.3390/su16083214
Martinez, E., Reid, C., & Tommelein, I. (2019). Lean construction for affordable housing: A case study in Latin America. CONSTRUCTION INNOVATION-ENGLAND, 19(4), 570–593. https://doi.org/10.1108/CI-02-2019-0015
Martínez, S., Harmsen, R., Menkveld, M., Faaij, A., & Kramer, G. (2022). Municipalities as key actors in the heat transition to decarbonise buildings: Experiences from local planning and implementation in a learning context. ENERGY POLICY, 169. https://doi.org/10.1016/j.enpol.2022.113169
Märzinger, T., & Österreicher, D. (2020). Extending the Application of the Smart Readiness Indicator—A Methodology for the Quantitative Assessment of the Load Shifting Potential of Smart Districts. Energies, 13(13), 3507. https://doi.org/10.3390/en13133507
Mata, É., Wanemark, J., Cheng, S. H., E Ó Broin, Hennlock, M., & Sandvall, A. (2021). Systematic map of determinants of buildings’ energy demand and CO2 emissions shows need for decoupling. Environmental Research Letters, 16(5). https://doi.org/10.1088/1748-9326/abe5d7
Matheus Koengkan, Fuinhas, J. A., Auza, A., & Ursavaş, U. (2023). The Impact of Energy Efficiency Regulations on Energy Poverty in Residential Dwellings in the Lisbon Metropolitan Area: An Empirical Investigation. Sustainability, 15(5), 4214. https://doi.org/10.3390/su15054214
Matheus Koengkan, Fuinhas, J. A., Radulescu, M., Kazemzadeh, E., Nooshin Karimi Alavijeh, Santiago, R., & Teixeira, M. (2023). Assessing the Role of Financial Incentives in Promoting Eco-Friendly Houses in the Lisbon Metropolitan Area—Portugal. Energies, 16(4), 1839. https://doi.org/10.3390/en16041839
Mathis, C. (2014). Bringing ASHRAE Home. ASHRAE Journal, 56(5), 27–28.
Mccarty, J., Scott, A., & Rysanek, A. (2021). Determining the retrofit viability of Vancouver’s single-detached homes: An expert elicitation. BUILDINGS & CITIES, 2(1), 354–377. https://doi.org/10.5334/bc.85
Meacham, B. J. (2010). Accommodating innovation in building regulation: Lessons and challenges. Building Research and Information, 38(6), 686.
Meckling, J., Sterner, T., & Wagner, G. (2017). Policy sequencing toward decarbonization. NATURE ENERGY, 2(12), 918–922. https://doi.org/10.1038/s41560-017-0025-8
Mehaffy, M. W. (2024). UN-Sustainable Urbanism: The Challenge of “Lock-In.” Sustainability, 16(17), 7301. https://doi.org/10.3390/su16177301
Mehibel, M. (2018). Sustainable housing design and development in relation to the city of Jijel, Algeria. PQDT - UK & Ireland. https://ezproxy.bu.edu/login?qurl=https://www.proquest.com/docview/2341280385?accountid=9676&bdid=81940&_bd=skr5ywg1yxrs5bjRgVEOO%2FwnI5c%3D
Mehta, K., & Zörner, W. (2023). Cracking the code: Mapping residential building energy performance in rural Central Asia through building typologies. SN Applied Sciences, 5(12), 349. https://doi.org/10.1007/s42452-023-05607-1
Meinardi, F., Bruni, F., & Brovelli, S. (2017). Luminescent solar concentrators for building-integrated photovoltaics. Nature Reviews. Materials, 2(12), 17072. https://doi.org/10.1038/natrevmats.2017.72
Mellross, M., & Fraser, B. (2012). DEVELOPING MUNICIPAL POLICY AND PROGRAMS TO ACCELERATE MARKET TRANSFORMATION IN THE BUILDING SECTOR. JOURNAL OF GREEN BUILDING, 7(4), 46–61. https://doi.org/10.3992/jgb.7.4.46
Menegazzo, D., Lombardo, G., Bobbo, S., De Carli, M., & Fedele, L. (2022). State of the Art, Perspective and Obstacles of Ground-Source Heat Pump Technology in the European Building Sector: A Review. Energies, 15(7), 2685. https://doi.org/10.3390/en15072685
Mengistu, D., Ashene, D., & Beyene, M. (2024). Micro and Small Enterprises’ Development in the Ethiopian Construction Industry: The Challenges and Improvement Regulatory Framework. JOURNAL OF CONSTRUCTION IN DEVELOPING COUNTRIES, 29(1), 67–85. https://doi.org/10.21315/jcdc-12-22-0214
Mengistu, D., Ashene, D., & Halabo, H. (2023). Technology and innovation development in Ethiopian construction industry: The challenges and improvement mechanisms. JOURNAL OF ENGINEERING DESIGN AND TECHNOLOGY. https://doi.org/10.1108/JEDT-10-2022-0528
Merrett, N. (2024a). Bringing down barriers to “old build” efficiency. H & V News, 26–27.
Merrett, N. (2024b). Energy efficiency is not just a heat pump issue. H & V News, 18–20.
Michelsen, C., Rosenschon, S., & Schulz, C. (2015). Small might be beautiful, but bigger performs better: Scale economies in “green” refurbishments of apartment housing. Energy Economics, 50, 240–250. https://doi.org/10.1016/j.eneco.2015.05.012
Mišík, M., Oravcová, V., & Vicenová, R. (2024). Energy efficiency of buildings in Central and Eastern Europe: Room for improvement. Energy Efficiency, 17(4), 32. https://doi.org/10.1007/s12053-024-10215-y
Moghaddasi, H., Culp, C., & Vanegas, J. (2021). Net Zero Energy Communities: Integrated Power System, Building and Transport Sectors. Energies, 14(21), 7065. https://doi.org/10.3390/en14217065
Mohamed, M., Ibrahim, A., Bashir, F., Chammam, A., Gnaba, H., Kadhim, S., & Khalilpoor, N. (2023). An assessment of the barriers to the adoption of green building technologies in Saudi Arabia. INTERNATIONAL JOURNAL OF LOW-CARBON TECHNOLOGIES, 18, 872–880. https://doi.org/10.1093/ijlct/ctad064
Mohammad, W., Abdullah, M., Ismail, S., & Takim, R. (2018). Building Information Modeling (BIM) adoption challenges for contractor’s organisations in Malaysia (WOS:000481577600148). 2016. https://doi.org/10.1063/1.5055550
Mok, K., Shen, G., & Yang, R. (2018). Stakeholder complexity in large scale green building projects: A holistic analysis towards a better understanding. ENGINEERING CONSTRUCTION AND ARCHITECTURAL MANAGEMENT, 25(11), 1454–1474. https://doi.org/10.1108/ECAM-09-2016-0205
Molnár, G., Cabeza, L., Chatterjee, S., & Ürge-Vorsatz, D. (2024). Modelling the building-related photovoltaic power production potential in the light of the EU’s Solar Rooftop Initiative. APPLIED ENERGY, 360. https://doi.org/10.1016/j.apenergy.2024.122708
Momade, M., Durdyev, S., Tam, N., Shahid, S., Mbachu, J., & Momade, Y. (2022). Factors influencing adoption of construction technologies in Vietnam’s residential construction projects. INTERNATIONAL JOURNAL OF BUILDING PATHOLOGY AND ADAPTATION. https://doi.org/10.1108/IJBPA-03-2022-0048
Momennia Rankohi, S. (2022). Investigating the Concept of Integration in Construction Projects: Cases of Integrated Project Delivery and Design for Manufacturing and Assembly. ProQuest Dissertations and Theses. https://ezproxy.bu.edu/login?qurl=https://www.proquest.com/docview/3102062916?accountid=9676&bdid=81940&_bd=uYZ0vbT5Jhpd3%2BwPtBMP3s2kCs8%3D
Moncaster, A., Malmqvist, T., Forman, T., Pomponi, F., & Anderson, J. (2022). Embodied carbon of concrete in buildings, Part 2: Are the messages accurate? Buildings & Cities, 3(1), 334. https://doi.org/10.5334/bc.199
Montero, O., Brischoux, P., Callegari, S., Fraga, C., Rüetschi, M., Vionnet, E., Calame, N., Rognon, F., Patel, M., & Hollmuller, P. (2022). Large Air-to-Water Heat Pumps for Fuel-Boiler Substitution in Non-Retrofitted Multi-Family Buildings—Energy Performance, CO2 Savings, and Lessons Learned in Actual Conditions of Use. Energies, 15(14), 5033. https://doi.org/10.3390/en15145033
Moradi, S., & Sormunen, P. (2023). Implementing Lean Construction: A Literature Study of Barriers, Enablers, and Implications. BUILDINGS, 13(2). https://doi.org/10.3390/buildings13020556
Morgan, G. T., Coleman, S., Robinson, J. B., Touchie, M. F., Poland, B., Jakubiec, A., Lach, N., & Cao, Y. (2022). Wellbeing as an emergent property of social practice. Buildings & Cities, 3(1), 756. https://doi.org/10.5334/bc.262
Morris, J., Allinson, D., Harrison, J., & Lomas, K. J. (2016). Benchmarking and tracking domestic gas and electricity consumption at the local authority level. Energy Efficiency, 9(3), 723. https://doi.org/10.1007/s12053-015-9393-8
Morrison, G. M. (2021). A Rapid Review on Community Connected Microgrids. Sustainability, 13(12), 6753. https://doi.org/10.3390/su13126753
Moshood, T., Rotimi, J., & Shahzad, W. (2024). Enhancing sustainability considerations in construction industry projects. ENVIRONMENT DEVELOPMENT AND SUSTAINABILITY. https://doi.org/10.1007/s10668-024-04946-2
Moyo, T., & Chigara, B. (2023). Barriers to lean construction implementation in Zimbabwe. JOURNAL OF ENGINEERING DESIGN AND TECHNOLOGY, 21(3), 733–757. https://doi.org/10.1108/JEDT-01-2021-0044
Muhammad Sami Ur Rehman, Shafiq, M. T., Ullah, F., & Khaled Galal Ahmed. (2023). A critical appraisal of traditional methods of construction progress monitoring. Built Environment Project and Asset Management, 13(6), 830–845. https://doi.org/10.1108/BEPAM-02-2023-0040
Mulligan, T., Mollaoglu-Korkmaz, S., Cotner, R., & Goldsberry, A. (2014). PUBLIC POLICY AND IMPACTS ON ADOPTION OF SUSTAINABLE BUILT ENVIRONMENTS: LEARNING FROM THE CONSTUCTION INDUSTRY PLAYMAKERS. JOURNAL OF GREEN BUILDING, 9(2), 182–202. https://doi.org/10.3992/1943-4618-9.2.182
Mustaffa, N., & Kudus, S. (2022). Challenges and way forward towards best practices of energy efficient building in Malaysia. ENERGY, 259. https://doi.org/10.1016/j.energy.2022.124839
Naber, E., Volk, R., & Schultmann, F. (2017). From the building level energy performance assessment to the national level: How are uncertainties handled in building stock models (WOS:000404873600150). 180, 1443–1452. https://doi.org/10.1016/j.proeng.2017.04.307
Nadel, S. (2019). Electrification in the Transportation, Buildings, and Industrial Sectors: A Review of Opportunities, Barriers, and Policies. Current Sustainable / Renewable Energy Reports, 6(4), 158–168. https://doi.org/10.1007/s40518-019-00138-z
Nair, G., Fransson, Å., & Olofsson, T. (2021). Perspectives of building professionals on the use of LCA tools in Swedish climate declaration (WOS:000668011100075). 246. https://doi.org/10.1051/e3sconf/202124613004
Narula, K., Ploiner, C., Getzinger, G., & Patel, M. (2022). Impact of energy efficiency and decarbonisation policies for buildings: A comparative assessment of Austria and Switzerland. ENERGY AND BUILDINGS, 268. https://doi.org/10.1016/j.enbuild.2022.112175
Nastasi, B. (2016). Renewable energy generation and integration in Sustainable Buildings – a focus on eco-fuels. Sustainable Buildings, 1, n/a. https://doi.org/10.1051/sbuild/2016003
Ndekugri, I., Ankrah, N. A., & Adaku, E. (2022). The design coordination role at the pre-construction stage of construction projects. Building Research and Information, 50(4), 452–466. https://doi.org/10.1080/09613218.2021.1971061
Negash, Y., Hassan, A., Tseng, M., Wu, K., & Ali, M. (2021). Sustainable construction and demolition waste management in Somaliland: Regulatory barriers lead to technical and environmental barriers. JOURNAL OF CLEANER PRODUCTION, 297. https://doi.org/10.1016/j.jclepro.2021.126717
Nerval, C. (2024). Industry needs policy certainty to win the sustainability battle. Property Week, 17–17.
Newton, S., Shirazi, A., & Christensen, P. (2023). Defining and demonstrating a smart technology configuration to improve energy performance and occupant comfort in existing buildings: A conceptual framework. International Journal of Building Pathology and Adaptation, 41(1), 182–200. https://doi.org/10.1108/IJBPA-04-2021-0046
NezamiFar, E. (2020). Building Occupant Environmental Behaviour (Boeb) Model for Leed-Certified Buildings. PQDT - UK & Ireland. https://ezproxy.bu.edu/login?qurl=https://www.proquest.com/docview/2497466992?accountid=9676&bdid=81940&_bd=oBkq%2Bqp99AaXRoIPO9LbVLmQAHA%3D
Nguyen, H., Skitmore, M., Gray, M., Zhang, X., & Olanipekun, A. (2017). Will green building development take off? An exploratory study of barriers to green building in Vietnam. RESOURCES CONSERVATION AND RECYCLING, 127, 8–20. https://doi.org/10.1016/j.resconrec.2017.08.012
Nguyen, T., & Nguyen, D. (2021). Barriers in BIM Adoption and the Legal Considerations in Vietnam. INTERNATIONAL JOURNAL OF SUSTAINABLE CONSTRUCTION ENGINEERING AND TECHNOLOGY, 12(1), 283–295. https://doi.org/10.30880/ijscet.2021.12.01.027
Nidam, Y., Irani, A., Bemis, J., & Reinhart, C. (2023). Census-based urban building energy modeling to evaluate the effectiveness of retrofit programs. ENVIRONMENT AND PLANNING B-URBAN ANALYTICS AND CITY SCIENCE, 50(9), 2394–2406. https://doi.org/10.1177/23998083231154576
Nikolaidou, E., Walker, I., Coley, D., Allen, S., Fosas, D., & Roberts, M. (2022). Towards Active Buildings: Stakeholder Perceptions of the Next Generation of Buildings. Energies, 15(15), 5706. https://doi.org/10.3390/en15155706
Nilchian, S., Sardroud, J. M., Darabpour, M., & Tafreshi, S. T. (2022). Features and Conditions of Building Information Modeling Contracts. Buildings, 12(11), 1839. https://doi.org/10.3390/buildings12111839
Nilimaa, J. (2023). Smart materials and technologies for sustainable concrete construction. DEVELOPMENTS IN THE BUILT ENVIRONMENT, 15. https://doi.org/10.1016/j.dibe.2023.100177
Nordt, A., Raven, R., Malekpour, S., & Sharp, D. (2024). Decarbonising industry supply chains: Incumbent-oriented transition intermediation for industry energy transition. ENVIRONMENTAL INNOVATION AND SOCIETAL TRANSITIONS, 51. https://doi.org/10.1016/j.eist.2024.100843
Novikova, A., Csoknyai, T., & Szalay, Z. (2018). Low carbon scenarios for higher thermal comfort in the residential building sector of South Eastern Europe. Energy Efficiency, 11(4), 845–875. https://doi.org/10.1007/s12053-017-9604-6
Nur Soleha Abdul Rahim, Balqish Abdul Rahman, Fazdliel Aswad Ibrahim, Ishak, N., & Ayob, A. (2023). The Contractors’ Perception on the Development of Green Building Projects in Penang. IOP Conference Series. Earth and Environmental Science, 1238(1), 012020. https://doi.org/10.1088/1755-1315/1238/1/012020
Nußholz, J. L. K., Nygaard Rasmussen, F., & Milios, L. (2019). Circular building materials: Carbon saving potential and the role of business model innovation and public policy. Resources, Conservation and Recycling, 141, 308–316. https://doi.org/10.1016/j.resconrec.2018.10.036
Nweye, K., Sankaranarayanan, S., & Nagy, Z. (2023). MERLIN: Multi-agent offline and transfer learning for occupant-centric operation of grid-interactive communities. APPLIED ENERGY, 346. https://doi.org/10.1016/j.apenergy.2023.121323
Nyawa, S., Gnekpe, C., & Tchuente, D. (2023). Transparent machine learning models for predicting decisions to undertake energy retrofits in residential buildings. ANNALS OF OPERATIONS RESEARCH. https://doi.org/10.1007/s10479-023-05217-5
Obergassel, W., Xia-Bauer, C., & Thomas, S. (2023). Strengthening global climate governance and international cooperation for energy-efficient buildings. ENERGY EFFICIENCY, 16(8). https://doi.org/10.1007/s12053-023-10177-7
Obrist, M., Kannan, R., McKenna, R., Schmidt, T., & Kober, T. (2023). High-temperature heat pumps in climate pathways for selected industry sectors in Switzerland. ENERGY POLICY, 173. https://doi.org/10.1016/j.enpol.2022.113383
Oduro, S., Pittri, H., Simons, B., Baah, B., Anteh, E., & Oduro, J. (2024). Awareness of net zero energy buildings among construction professionals in the Ghanaian construction industry. BUILT ENVIRONMENT PROJECT AND ASSET MANAGEMENT. https://doi.org/10.1108/BEPAM-01-2024-0001
Oguntona, O. A., & Aigbavboa, C. O. (2019). Barriers Militating Against the Adoption of Biomimicry as a Sustainable Construction Practice. MATEC Web of Conferences, 266, n/a. https://doi.org/10.1051/matecconf/201926603010
Ohene, E., Chan, A. P. C., Darko, A., & Nani, G. (2023). Navigating toward net zero by 2050: Drivers, barriers, and strategies for net zero carbon buildings in an emerging market. Building and Environment, 242, 110472. https://doi.org/10.1016/j.buildenv.2023.110472
Ojelabi, R. A., Mohammed, T. A., & Oladiran, O. J. (2024). Awareness and Implementation Challenges of the Green Retrofitting in Building Enclosure in the Nigerian Construction Industry. IOP Conference Series. Earth and Environmental Science, 1342(1), 012023. https://doi.org/10.1088/1755-1315/1342/1/012023
Oke, A., Aigbavboa, C., & Khangale, T. (2018). Effect of Skills Shortage on Sustainable Construction (WOS:000465822600029). 600, 303–309. https://doi.org/10.1007/978-3-319-60450-3_29
Oke, A., Aliu, J., Ehiosun, L., Kineber, A., & Stephen, S. (2024). Adoption of distributed ledger technology for construction projects: A study of the challenges in a developing country. JOURNAL OF ENGINEERING DESIGN AND TECHNOLOGY. https://doi.org/10.1108/JEDT-11-2023-0474
Oke, D., Aghimien, D., Aigbavboa, C., & Musenga, C. (2019). Drivers of Sustainable Construction Practices in the Zambian Construction Industry (WOS:000471031703095). 158, 3246–3252. https://doi.org/10.1016/j.egypro.2019.01.995
Olanrewaju, O., Enegbuma, W., Donn, M., & Chileshe, N. (2022). Building information modelling and green building certification systems: A systematic literature review and gap spotting. SUSTAINABLE CITIES AND SOCIETY, 81. https://doi.org/10.1016/j.scs.2022.103865
Olatunji Ayodeji Aiyetan & Das Dillip. (2018). System Dynamics Approach to Mitigating Skilled Labour Shortages in the Construction Industry: A South Africa Context. Construction Economics and Building, 18(4), 45. https://doi.org/10.5130/AJCEB.v18i4.6041
Olatunji, O. A. (2014). Views on building information modelling, procurement and contract management. Proceedings of the Institution of Civil Engineers. Management, Procurement and Law, 167(3), 117–126. https://doi.org/10.1680/mpal.13.00011
Olatz Nicolas, & Molina-Costa, P. (2021). Demand Aggregation as a Strategy for Untapping Buildings’ Energy Renovation Potential: Diagnosis and Prioritization Methodology and Case Study from the Basque Country. Sustainability, 13(24), 13881. https://doi.org/10.3390/su132413881
Olawumi, T., & Chan, D. (2020). Concomitant impediments to the implementation of smart sustainable practices in the built environment. SUSTAINABLE PRODUCTION AND CONSUMPTION, 21, 239–251. https://doi.org/10.1016/j.spc.2019.09.001
Olawumi, T., Chan, D., Wong, J., & Chan, A. (2018). Barriers to the integration of BIM and sustainability practices in construction projects: A Delphi survey of international experts. JOURNAL OF BUILDING ENGINEERING, 20, 60–71. https://doi.org/10.1016/j.jobe.2018.06.017
Olivadese, R., Remøy, H., Berizzi, C., & Hobma, F. (2017). Reuse into housing: Italian and Dutch regulatory effects. Property Management, 35(2), 165. https://doi.org/10.1108/PM-10-2015-0054
Oliveira, R., Almeida, R. M., Figueiredo, A., & Romeu Vicente. (2021). A Case Study on a Stochastic-Based Optimisation Approach towards the Integration of Photovoltaic Panels in Multi-Residential Social Housing. Energies, 14(22), 7615. https://doi.org/10.3390/en14227615
Oliveira, R., Lopes, J., & Abreu, M. (2021). Sustainability Perspective to Support Decision Making in Structural Retrofitting of Buildings: A Case Study. SYSTEMS, 9(4). https://doi.org/10.3390/systems9040078
Olsthoorn, M., Schleich, J., & Faure, C. (2019). Exploring the diffusion of low-energy houses: An empirical study in the European Union. ENERGY POLICY, 129, 1382–1393. https://doi.org/10.1016/j.enpol.2019.03.043
Oluleye, B. I., Chan, D. W., & Olawumi, T. O. (2022). Barriers to circular economy adoption and concomitant implementation strategies in building construction and demolition waste management: A PRISMA and interpretive structural modeling approach. Habitat International, 126, 102615.
Oluleye, B., Chan, D., Olawumi, T., & Saka, A. (2023). Assessment of symmetries and asymmetries on barriers to circular economy adoption in the construction industry towards zero waste: A survey of international experts. BUILDING AND ENVIRONMENT, 228. https://doi.org/10.1016/j.buildenv.2022.109885
Omar, M., Ayob, A., Zakaria, M., Rahim, N., Mokhtar, H., Rani, H., & Rahman, F. (2023). Perspective of Construction Building Professionals on Low-Carbon Materials in Malaysia. JOURNAL OF CONSTRUCTION IN DEVELOPING COUNTRIES, 28(2), 139–162. https://doi.org/10.21315/jcdc-04-22-0081
Omopariola, E., Olanrewaju, O., Albert, I., Oke, A., & Ibiyemi, S. (2024). Sustainable construction in the Nigerian construction industry: Unsustainable practices, barriers and strategies. JOURNAL OF ENGINEERING DESIGN AND TECHNOLOGY, 22(4), 1158–1184. https://doi.org/10.1108/JEDT-11-2021-0639
Omotayo, T., Ross, J., Oyetunji, A., & Udeaja, C. (2024). Systems Thinking Interplay Between Project Complexities, Stakeholder Engagement, and Social Dynamics Roles in Influencing Construction Project Outcomes. SAGE OPEN, 14(2). https://doi.org/10.1177/21582440241255872
Onecha, B., Dotor, A., & Marmolejo-Duarte, C. (2021). Beyond Cultural and Historic Values, Sustainability as a New Kind of Value for Historic Buildings. Sustainability, 13(15), 8248. https://doi.org/10.3390/su13158248
Onososen, A., & Musonda, I. (2022). Barriers to BIM-Based Life Cycle Sustainability Assessment for Buildings: An Interpretive Structural Modelling Approach. BUILDINGS, 12(3). https://doi.org/10.3390/buildings12030324
Onososen, A., Musonda, I., Onatayo, D., Tjebane, M., Saka, A., & Fagbenro, R. (2023). Impediments to Construction Site Digitalisation Using Unmanned Aerial Vehicles (UAVs). DRONES, 7(1). https://doi.org/10.3390/drones7010045
Onubogu, N. O., Kok-Keong Chong, & Ming-Hui, T. (2021). Review of Active and Passive Daylighting Technologies for Sustainable Building. International Journal of Photoenergy, 2021. https://doi.org/10.1155/2021/8802691
Optimising energy efficiency for the comfort of the nZEB experimental building: A new approach. (2023). AIP Conference Proceedings, 2928(1). https://doi.org/10.1063/5.0170895
Osei-Tutu, S., Ayarkwa, J., Dickson Osei-Asibey, Nani, G., & Afful, A. E. (2023). Barriers impeding circular economy (CE) uptake in the construction industry. Smart and Sustainable Built Environment, 12(4), 892–918. https://doi.org/10.1108/SASBE-03-2022-0049
Oshiro, K., Masui, T., & Kainuma, M. (2018). Transformation of Japan’s energy system to attain net-zero emission by 2050. CARBON MANAGEMENT, 9(5), 493–501. https://doi.org/10.1080/17583004.2017.1396842
Osuizugbo, I., Nnodu, C., Onokwai, A., & Olojo, A. (2024). Perceived Factors Inhibiting Environmental Impact Assessment Practice in Construction Industry. PRACTICE PERIODICAL ON STRUCTURAL DESIGN AND CONSTRUCTION, 29(1). https://doi.org/10.1061/PPSCFX.SCENG-1257
Ouf, M., Osman, M., Bitzilos, M., & Gunay, B. (2024). Can you lower the thermostat? Perceptions of demand response programs in a sample from Quebec. ENERGY AND BUILDINGS, 306. https://doi.org/10.1016/j.enbuild.2024.113933
Oyefusi, O., Arowoiya, V., & Chan, M. (2024). Hybrid MCDM approach for analyzing barriers and formulating strategies for the adoption of modular construction in developing countries. ENGINEERING CONSTRUCTION AND ARCHITECTURAL MANAGEMENT. https://doi.org/10.1108/ECAM-01-2024-0082
Oyewobi, L., & Jimoh, R. (2022). Barriers to Adoption of Sustainable Procurement in the Nigerian Public Construction Sector. SUSTAINABILITY, 14(22). https://doi.org/10.3390/su142214832
Pacheco, M., & Lamberts, R. (2013). Assessment of technical and economical viability for large-scale conversion of single family residential buildings into zero energy buildings in Brazil: Climatic and cultural considerations. ENERGY POLICY, 63, 716–725. https://doi.org/10.1016/j.enpol.2013.07.133
Padovani, F., Sommerfeldt, N., Longobardi, F., & Pearce, J. (2021). Decarbonizing rural residential buildings in cold climates: A techno-economic analysis of heating electrification. ENERGY AND BUILDINGS, 250. https://doi.org/10.1016/j.enbuild.2021.111284
Páez, P., Araya, F., Salazar, L., Giménez, Z., Sánchez, O., Sierra-Varela, L., & Neculman, B. (2024). Exploring Perceptions toward Emotional Intelligence in Chilean Construction Using a Qualitative Approach. BUILDINGS, 14(4). https://doi.org/10.3390/buildings14040905
Paiho, S., & Ahvenniemi, H. (2017). Non-Technical Barriers to Energy Efficient Renovation of Residential Buildings and Potential Policy Instruments to overcome Them-Evidence from Young Russian Adults. Buildings, 7(4), 101. https://doi.org/10.3390/buildings7040101
Pallonetto, F. (2022). Advanced Energy Management Systems and Demand-Side Measures for Buildings towards the Decarbonisation of Our Society. In TRANSITIONING TO AFFORDABLE AND CLEAN ENERGY (WOS:001237316800006; Vol. 7, p. +). https://doi.org/10.3390/books978-3-03897-777-3
Panakaduwa, C., Coates, P., & Munir, M. (2024). Identifying sustainable retrofit challenges of historical Buildings: A systematic review. Energy and Buildings, 114226.
Passoni, C., Caruso, M., Marini, A., Pinho, R., & Landolfo, R. (2022). The Role of Life Cycle Structural Engineering in the Transition towards a Sustainable Building Renovation: Available Tools and Research Needs. Buildings, 12(8), 1107. https://doi.org/10.3390/buildings12081107
Pearce, A., Doshi, P., & Carneal, M. (2016). Leverage Points for Sustainability: Targeting Stakeholders, Innovations, and Decision Types of Maximal Influence (WOS:000389279902018). 1181–1191.
Peavey, J. B., Hudson, E., Summy, Z. A., & Violette, J. (2023). 3D Concrete Printed Houses: Barriers to Adoption and Construction Practices. Cityscape, 25(1), 163–175.
Pedrosa, M., Arantes, A., & Cruz, C. (2023). Barriers to Adopting Lean Methodology in the Portuguese Construction Industry. BUILDINGS, 13(8). https://doi.org/10.3390/buildings13082047
Pelenur, M. J., & Cruickshank, H. J. (2014). Motivations to adopting energy efficiency measures in the home. Proceedings of the Institution of Civil Engineers. Energy, 167(3), 103–116. https://doi.org/10.1680/ener.14.00013
Perceived Benefits of Energy Efficiency in the Spanish Residential Market and Their Relation to Sociodemographic and Living Conditions. (2021). Applied Sciences, 11(2), 875. https://doi.org/10.3390/app11020875
Pérez-Navarro, J., Bueso, M., & Vázquez, G. (2023). Drivers of and Barriers to Energy Renovation in Residential Buildings in Spain-The Challenge of Next Generation EU Funds for Existing Buildings. BUILDINGS, 13(7). https://doi.org/10.3390/buildings13071817
Perry, C., PE, & Nadel, S. (2021). Electrifying Space Heating in Existing Commercial Buildings: Opportunities and Challenges. ASHRAE Transactions, 127, 62–70.
Persson, J., & Grönkvist, S. (2015). Drivers for and barriers to low-energy buildings in Sweden. JOURNAL OF CLEANER PRODUCTION, 109, 296–304. https://doi.org/10.1016/j.jclepro.2014.09.094
Piantanida, P., Ostorero, C. L., Vottari, A., Manni, V., Valzano, L. S., Farnetani, R., & Surra, M. (2023). Strategies for a Positive Anthropogenic Impact in Postwar Buildings. Sustainability, 15(10), 7809. https://doi.org/10.3390/su15107809
Pimentel, M., Arantes, A., & Cruz, C. (2022). Barriers to the Adoption of Reverse Logistics in the Construction Industry: A Combined ISM and MICMAC Approach. SUSTAINABILITY, 14(23). https://doi.org/10.3390/su142315786
Pittri, H., Godawatte, A., Agyekum, K., Botchway, E., Dompey, A., Oduro, S., & Asamoah, E. (2024). Examining the barriers to implementing design for deconstruction in the construction industry of a developing country. CONSTRUCTION INNOVATION-ENGLAND. https://doi.org/10.1108/CI-09-2023-0239
Plavina, A., & Gruner, M. (2019). Selbukassa—A Case Study for Aiming at Low Emission Buildings through Extensive Reuse of Materials. IOP Conference Series. Earth and Environmental Science, 352(1). https://doi.org/10.1088/1755-1315/352/1/012067
Poncin Stéphane. (2021). Energy Policies for Eco-Friendly Households in Luxembourg: A Study Based on the LuxHEI Model. Environmental Modeling & Assessment, 26(1), 37–61. https://doi.org/10.1007/s10666-020-09725-7
Popescu, C., Apostu, S., Radulescu, I., Muresan, J., & Brezoi, A. (2024). Energizing the Now: Navigating the Critical Landscape of Today’s Energy Challenges-An In-Depth Review. ENERGIES, 17(3). https://doi.org/10.3390/en17030675
Popovski, E., Aydemir, A., Fleiter, T., Bellstaedt, D., Büchele, R., & Steinbach, J. (2019). The role and costs of large-scale heat pumps in decarbonising existing district heating networks—A case study for the city of Herten in Germany. ENERGY, 180, 918–933. https://doi.org/10.1016/j.energy.2019.05.122
Prabatha, T., Hewage, K., & Sadiq, R. (2022). An Energy Performance Contract Optimization Approach to Meet the Competing Stakeholder Expectations under Uncertainty: A Canadian Case Study. Sustainability, 14(7), 4334. https://doi.org/10.3390/su14074334
Primozic, L., & Kutnar, A. (2024). Key decision factors of professional stakeholders (architects, engineers, constructors) when deciding for sustainable construction. FRONTIERS IN BUILT ENVIRONMENT, 10. https://doi.org/10.3389/fbuil.2024.1420163
Puček, M. M., Khoja, A., Bazzan, E., & Gyuris, P. (2023). A Data Structure for Digital Building Logbooks: Achieving Energy Efficiency, Sustainability, and Smartness in Buildings across the EU. Buildings, 13(4), 1082. https://doi.org/10.3390/buildings13041082
Qin Xiaoxiang, Yin Junjia, Nuzul Azam Haron, Alias, A. H., Law, T. H., & Nabilah Abu Bakar. (2024). Status, Challenges and Future Directions in the Evaluation of Net-Zero Energy Building Retrofits: A Bibliometrics-Based Systematic Review. Energies, 17(15), 3826. https://doi.org/10.3390/en17153826
Qiu, D., Xue, J., Zhang, T., Wang, J., & Sun, M. (2023). Federated reinforcement learning for smart building joint peer-to-peer energy and carbon allowance trading. APPLIED ENERGY, 333. https://doi.org/10.1016/j.apenergy.2022.120526
R P N P Weerasinghe, & Yang, R. J. (2022). Impact of technology developments on multicriteria performances of BIPV in non-domestic buildings. IOP Conference Series. Earth and Environmental Science, 1101(2), 022029. https://doi.org/10.1088/1755-1315/1101/2/022029
R.GREENAN1 & B. MUIR2. (2017). NEW ZEALAND’S BUILDING PERFORMANCE PATHWAYS. International Journal of Sustainable Development and Planning, 12(2), 252. https://doi.org/10.2495/SDP-V12-N2-252-263
Rahim, N., Ismail, S., Subramaniam, C., Habib, S., & Durdyev, S. (2023). Building Information Modelling Strategies in Sustainable Housing Construction Projects in Malaysia. SUSTAINABILITY, 15(3). https://doi.org/10.3390/su15032313
Rajabi, M., Sardroud, J., & Kheyroddin, A. (2021). Green standard model using machine learning: Identifying threats and opportunities facing the implementation of green building in Iran. ENVIRONMENTAL SCIENCE AND POLLUTION RESEARCH, 28(44), 62796–62808. https://doi.org/10.1007/s11356-021-14991-3
Rajendra, P., & Mohanasundaram, T. (2024). Factors driving consumer adoption of smart and green building materials: The role of civil engineers and architects. JOURNAL OF ASIAN ARCHITECTURE AND BUILDING ENGINEERING. https://doi.org/10.1080/13467581.2024.2373819
Rajski, K., Englart, S., & Sohani, A. (2024). Analysis of Greywater Recovery Systems in European Single-Family Buildings: Economic and Environmental Impacts. Sustainability, 16(12), 4912. https://doi.org/10.3390/su16124912
Raman, N. S., Devraj, A. M., Barooah, P., & Meyn, S. P. (2020). Reinforcement Learning for Control of Building HVAC Systems. The Institute of Electrical and Electronics Engineers, Inc. (IEEE) Conference Proceedings, 2326. https://doi.org/10.23919/ACC45564.2020.9147629
Rameezdeen, R., Zuo, J., & Stevens, J. (2017). Practices, drivers and barriers of implementing green leases: Lessons from South Australia. Journal of Corporate Real Estate, 19(1), 36–52. https://doi.org/10.1108/JCRE-04-2016-0018
Ramirez, J., Velazquez, D., & Velez-Zapata, C. (2022). The potential role of peace, justice, and strong institutions in Colombia?s areas of limited statehood for energy diversification towards governance in energy democracy. ENERGY POLICY, 168. https://doi.org/10.1016/j.enpol.2022.113135
Raouf, A., & Al-Ghamdi, S. (2019). Building information modelling and green buildings: Challenges and opportunities. ARCHITECTURAL ENGINEERING AND DESIGN MANAGEMENT, 15(1), 1–28. https://doi.org/10.1080/17452007.2018.1502655
Rasheed, A., Booth, C., & Horry, R. (2023). Stakeholder perceptions of the benefits and barriers of implementing environmental management systems in the Maldivian construction industry. JOURNAL OF HOUSING AND THE BUILT ENVIRONMENT, 38(4), 2821–2850. https://doi.org/10.1007/s10901-023-10067-5
Rauniyar, A., Singh, A., Kineber, A., Chandra, S., Awuzie, B., Kumar, V., Krishnaraj, L., Al-Otaibi, A., Alabdullatief, A., & Alfraidi, S. (2024). A strategic roadmap for combating barriers negating the implementation of prefabricated net-zero carbon buildings. DEVELOPMENTS IN THE BUILT ENVIRONMENT, 18. https://doi.org/10.1016/j.dibe.2024.100432
Razmjoo, A., Nezhad, M., Kaigutha, L., Marzband, M., Mirjalili, S., Pazhoohesh, M., Memon, S., Ehyaei, M., & Piras, G. (2021). Investigating Smart City Development Based on Green Buildings, Electrical Vehicles and Feasible Indicators. SUSTAINABILITY, 13(14). https://doi.org/10.3390/su13147808
Reda, F., Ruggiero, S., Auvinen, K., & Temmes, A. (2021). Towards low-carbon district heating: Investigating the socio-technical challenges of the urban energy transition. SMART ENERGY, 4. https://doi.org/10.1016/j.segy.2021.100054
Reindl, K., & Palm, J. (2021). Installing PV: Barriers and enablers experienced by non-residential property owners. RENEWABLE & SUSTAINABLE ENERGY REVIEWS, 141. https://doi.org/10.1016/j.rser.2021.110829
Reis, D., De Domenico, A., Lopes, L., & Almeida, M. (2023). Strategies and Actions for Achieving Carbon Neutrality in Portuguese Residential Buildings by 2050. SUSTAINABILITY, 15(21). https://doi.org/10.3390/su152115626
Reis, I. F. G., Gonçalves, I., Lopes, M. A. R., & Antunes, C. H. (2022). Collective self-consumption in multi-tenancy buildings–To what extent do consumers’ goals influence the energy system’s performance? Sustainable Cities and Society, 80, 103688. https://doi.org/10.1016/j.scs.2022.103688
Reyes-Veras, P., Renukappa, S., & Suresh, S. (2021). CHALLENGES FACED BY THE ADOPTION OF BIG DATA IN THE DOMINICAN REPUBLIC CONSTRUCTION INDUSTRY: AN EMPIRICAL STUDY. JOURNAL OF INFORMATION TECHNOLOGY IN CONSTRUCTION, 26, 812–831. https://doi.org/10.36680/j.itcon.2021.044
Rios, F., Grau, D., & Bilec, M. (2021). Barriers and Enablers to Circular Building Design in the US: An Empirical Study. JOURNAL OF CONSTRUCTION ENGINEERING AND MANAGEMENT, 147(10). https://doi.org/10.1061/(ASCE)CO.1943-7862.0002109
Roadblocks to Low Temperature District Heating. (2020). Energies, 13(22), 5893. https://doi.org/10.3390/en13225893
Rocha, L., Rui Fernandes Póvoas, & Restivo, J. (2023). The Right to Comfort in Social Housing: Energy and Thermal Performances as Parameters of a Systemic Analysis. Buildings, 13(5), 1173. https://doi.org/10.3390/buildings13051173
Rock, S., Hosseini, M. R., Nikmehr, B., Martek, I., Abrishami, S., & Durdyev, S. (2019). Barriers to “green operation” of commercial office buildings; Perspectives of Australian facilities managers. Facilities, 37(13/14), 1048–1065. https://doi.org/10.1108/F-08-2018-0101
Rodrigues, A. M., Olubimbola Oladimeji, Guedes, A. L. A., Chinelli, C. K., Haddad, A. N., & Soares, C. A. P. (2023). The Project Manager’s Core Competencies in Smart Building Project Management. Buildings, 13(8), 1981. https://doi.org/10.3390/buildings13081981
Rodriguez, N., Katooziani, A., & Jeelani, I. (2024). Barriers to energy-efficient design and construction practices: A comprehensive analysis. JOURNAL OF BUILDING ENGINEERING, 82. https://doi.org/10.1016/j.jobe.2023.108349
Romero-Lankao, P., Wilson, A., Sperling, J., Miller, C., Zimny-Schmitt, D., Sovacool, B., Gearhart, C., Muratori, M., Bazilian, M., Zünd, D., Young, S., Brown, M., & Arent, D. (2021). Of actors, cities and energy systems: Advancing the transformative potential of urban electrification. PROGRESS IN ENERGY, 3(3). https://doi.org/10.1088/2516-1083/abfa25
Romo, R., Alejo-Reyes, A., & Orozco, F. (2024). Statistical Analysis of Lean Construction Barriers to Optimize Its Implementation Using PLS-SEM and PCA. BUILDINGS, 14(2). https://doi.org/10.3390/buildings14020486
Rose, C., & Stegemann, J. (2019). Characterising existing buildings as material banks (E-BAMB) to enable component reuse. PROCEEDINGS OF THE INSTITUTION OF CIVIL ENGINEERS-ENGINEERING SUSTAINABILITY, 172(3), 129–140. https://doi.org/10.1680/jensu.17.00074
Rosner, Y., Amitay, Z., & Perlman, A. (2022). Consumer’s attitude, socio-demographic variables and willingness to purchase green housing in Israel. ENVIRONMENT DEVELOPMENT AND SUSTAINABILITY, 24(4), 5295–5316. https://doi.org/10.1007/s10668-021-01659-8
Rotimi, F., Almughrabi, F., Samarasinghe, D., & Silva, C. (2022). Specific Skill Requirements within Prefabricated Residential Construction: Stakeholders’ Perspectives. BUILDINGS, 12(1). https://doi.org/10.3390/buildings12010043
Rozwadowska, M., & Szymanski, P. (2019). Barriers that Limit the Scaling of RES Projects in Polish Cities (WOS:000561117205083). 11583–11595.
Ruá, M. J., Pitarch, Á. M., Arín, I., & Reig, L. (2024). A Roof Refurbishment Strategy to Improve the Sustainability of Building Stock: A Case Study. Sustainability, 16(5), 2028. https://doi.org/10.3390/su16052028
Ruffino, E., Piga, B., Casasso, A., & Sethi, R. (2022). Heat Pumps, Wood Biomass and Fossil Fuel Solutions in the Renovation of Buildings: A Techno-Economic Analysis Applied to Piedmont Region (NW Italy). Energies, 15(7), 2375. https://doi.org/10.3390/en15072375
Ruiz, S., Jimenez, J., & Carvajal, S. (2022). Zero Energy Balance Buildings: Definitions, Current Challenges and Future Opportunities. IEEE LATIN AMERICA TRANSACTIONS, 20(3), 417–429. https://doi.org/10.1109/TLA.2022.9667140
Rumsey, P., PE, Garrec, J., & Levasseur, A., PE. (2021). How Building Decarbonization Can Transform HVAC. ASHRAE Journal, 63(9), 14–27.
Saadatian, A., & Olbina, S. (2024). Barriers to the implementation of energy-efficiency practices in the US retail sector: Facilities managers’ perceptions compared by facility size and business revenue. FACILITIES, 42(7/8), 622–640. https://doi.org/10.1108/F-11-2023-0095
Sabri, R., & Olagoke, O. (2021). Safeguarding the colonial era’s ecclesiastical heritage: Towards a sustainable protection-use model. JOURNAL OF CULTURAL HERITAGE MANAGEMENT AND SUSTAINABLE DEVELOPMENT, 11(1), 121–134. https://doi.org/10.1108/JCHMSD-01-2020-0017
Sachs, J., Schmidt-Traub, G., Mazzucato, M., Messner, D., Nakicenovic, N., & Rockström, J. (2019). Six Transformations to achieve the Sustainable Development Goals. NATURE SUSTAINABILITY, 2(9), 805–814. https://doi.org/10.1038/s41893-019-0352-9
Safonov, G., Potashnikov, V., Lugovoy, O., Safonov, M., Dorina, A., & Bolotov, A. (2020). The low carbon development options for Russia. Climatic Change, 162(4), 1929–1945. https://doi.org/10.1007/s10584-020-02780-9
Saha, S., Hiremath, R., & Sanjay, P. (2022). Barriers to adoption of green buildings – a review. Cardiometry, 22, 377–385. https://doi.org/10.18137/cardiometry.2022.22.377385
Sajid, Z., Aftab, U., & Ullah, F. (2024). Barriers to adopting circular procurement in the construction industry: The way forward. SUSTAINABLE FUTURES, 8. https://doi.org/10.1016/j.sftr.2024.100244
Sakr, D., Sherif, A., & El-Haggar, S. (2010). Environmental management systems’ awareness: An investigation of top 50 contractors in Egypt. JOURNAL OF CLEANER PRODUCTION, 18(3), 210–218. https://doi.org/10.1016/j.jclepro.2009.09.021
Salazar, J., Guevara, J., Espinosa, M., Rivera, F., & Franco, J. (2022). Decarbonization of the Colombian Building Sector: Social Network Analysis of Enabling Stakeholders. BUILDINGS, 12(10). https://doi.org/10.3390/buildings12101531
Saliu, L., Monko, R., Zulu, S., & Maro, G. (2024). Barriers to the Integration of Building Information Modeling (BIM) in Modular Construction in Sub-Saharan Africa. BUILDINGS, 14(8). https://doi.org/10.3390/buildings14082448
Saloux, E., Zhang, K., & Candanedo, J. A. (2023). A Critical Perspective on Current Research Trends in Building Operation: Pressing Challenges and Promising Opportunities. Buildings, 13(10), 2566. https://doi.org/10.3390/buildings13102566
Samarasinghe, D., Baghaei, N., & Stemmet, L. (2020). Persuasive Virtual Reality: Promoting Earth Buildings in New Zealand (WOS:000788445100016). 12064, 208–220. https://doi.org/10.1007/978-3-030-45712-9_16
Sánchez-García, L., Averfalk, H., & Persson, U. (2021). Further investigations on the Effective Width for district heating systems. ENERGY REPORTS, 7, 351–358. https://doi.org/10.1016/j.egyr.2021.08.096
Sandin, S., Neij, L., & Mickwitz, P. (2019). Transition governance for energy efficiency—Insights from a systematic review of Swedish policy evaluation practices. Energy, Sustainability and Society, 9(1), 1–18. https://doi.org/10.1186/s13705-019-0203-6
Sanga, S. A. (2020). Compliance with Building Material Specifications among Informal Skilled Construction Workers in Dar es Salaam, Tanzania. Journal of Construction in Developing Countries, 25(2), 63–91. https://doi.org/10.21315/jcdc2020.25.2.3
Santana-Sosa, A., & Kovacic, I. (2022). Barriers, Opportunities and Recommendations to Enhance the Adoption of Timber within Multi-Storey Buildings in Austria. Buildings, 12(9), 1416. https://doi.org/10.3390/buildings12091416
Santos, P., Génesis Camila Cervantes, Zaragoza-Benzal, A., Byrne, A., Karaca, F., Ferrández, D., Salles, A., & Bragança, L. (2024). Circular Material Usage Strategies and Principles in Buildings: A Review. Buildings, 14(1), 281. https://doi.org/10.3390/buildings14010281
Sao, A., Goswami, A., Verma, A., Kataria, R., & Shahi, R. (2023). Challenges in the adoption of building information technology (BIM) technology in Indian construction industry (ICI). JOURNAL OF INFORMATION & OPTIMIZATION SCIENCES, 44(8), 1577–1593. https://doi.org/10.47974/JIOS-1477
Sarafidis, Y., Demertzis, N., Georgopoulou, E., Avrami, L., Mirasgedis, S., & Kaminiaris, O. (2024). Socioeconomic Impacts of Climate Mitigation Actions in Greece: Quantitative Assessment and Public Perception. ATMOSPHERE, 15(4). https://doi.org/10.3390/atmos15040454
Sardroud, J. M., Mehdizadehtavasani, M., Khorramabadi, A., & Ranjbardar, A. (2018). Barriers Analysis to Effective Implementation of BIM in the Construction Industry. ISARC. Proceedings of the International Symposium on Automation and Robotics in Construction, 35, 1–8.
Sasges, G., & Ziegler, A. (2023). We Have Eaten the Rivers: The Past, Present, and Unsustainable Future of Hydroelectricity in Vietnam. SUSTAINABILITY, 15(11). https://doi.org/10.3390/su15118969
Scamman, D., Solano-Rodríguez, B., Pye, S., Chiu, L., Smith, A., Cassarino, T., Barrett, M., & Lowe, R. (2020). Heat Decarbonisation Modelling Approaches in the UK: An Energy System Architecture Perspective. ENERGIES, 13(8). https://doi.org/10.3390/en13081869
Schaffert, M., Warch, D., & Müller, H. (2024). A Planning Support System for Monitoring Aging Neighborhoods in Germany. Geomatics, 4(1), 66. https://doi.org/10.3390/geomatics4010004
Scherz, M., Kreiner, H., Alaux, N., & Passer, A. (2023). Transition of the procurement process to Paris-compatible buildings: Consideration of environmental life cycle costing in tendering and awarding. The International Journal of Life Cycle Assessment, 28(7), 843–861. https://doi.org/10.1007/s11367-023-02153-1
Scherz, M., Wieser, A. A., Passer, A., & Kreiner, H. (2022). Implementation of Life Cycle Assessment (LCA) in the Procurement Process of Buildings: A Systematic Literature Review. Sustainability, 14(24), 16967. https://doi.org/10.3390/su142416967
Schildt, J., Booth, C., Horry, R., & Wiejak-Roy, G. (2023). Stakeholder Opinions of Implementing Environmental Management Systems in the Construction Sector of the US. BUILDINGS, 13(5). https://doi.org/10.3390/buildings13051241
Schmidt, J., & Griffin, C. (2013). Barriers to the design and use of cross-laminated timber structures in high-rise multi-family housing in the United States (WOS:000350208600277). 2225–2231.
Schwartz, E. K. (n.d.). ENERGY AND COST OPTIMIZATION FOR CASE STUDY IN BOULDER, COLORADO.
Schwartz, E. K., & Krarti, M. (2022). Review of Adoption Status of Sustainable Energy Technologies in the US Residential Building Sector. Energies, 15(6), 2027. https://doi.org/10.3390/en15062027
Schweber, L., & Leiringer, R. (2012). Beyond the technical: A snapshot of energy and buildings research. BUILDING RESEARCH AND INFORMATION, 40(4), 481–492. https://doi.org/10.1080/09613218.2012.675713
Scipioni, S., Russ, M., & Niccolini, F. (2021). From Barriers to Enablers: The Role of Organizational Learning in Transitioning SMEs into the Circular Economy. Sustainability, 13(3), 1021. https://doi.org/10.3390/su13031021
Sedighi, M., Qhazvini, P. P., & Amidpour, M. (2023). Algae-Powered Buildings: A Review of an Innovative, Sustainable Approach in the Built Environment. Sustainability, 15(4), 3729. https://doi.org/10.3390/su15043729
Sesana, M. M., Rivallain, M., & Graziano Salvalai. (2020). Overview of the Available Knowledge for the Data Model Definition of a Building Renovation Passport for Non-Residential Buildings: The ALDREN Project Experience. Sustainability, 12(2), 642. https://doi.org/10.3390/su12020642
Shah, S. (2012). Sustainable Refurbishment. Sustainable Refurbishment. https://ezproxy.bu.edu/login?qurl=https://www.proquest.com/docview/2131181696?accountid=9676&bdid=77468&_bd=vpVlqiaDQwhTLb16TZ3QHA2uLW4%3D
Shaker, M., Eustace, B., Erukala, H., Patel, R., Mohammed, M., Jabri, M., Desai, K., Goyal, R., & Chang, B. (2022). Analysis of Survey on Barriers to the Implementation of Sustainable Projects. SUSTAINABILITY, 14(24). https://doi.org/10.3390/su142416830
Shapiro, S. (2016). The realpolitik of building codes: Overcoming practical limitations to climate resilience. BUILDING RESEARCH AND INFORMATION, 44(5–6), 490–506. https://doi.org/10.1080/09613218.2016.1156957
Sheikh Zuhaib, Manton, R., Hajdukiewicz, M., Keane, M. M., & Goggins, J. (2017). Attitudes and approaches of Irish retrofit industry professionals towards achieving nearly zero-energy buildings. International Journal of Building Pathology and Adaptation, 35(1), 16–40. https://doi.org/10.1108/IJBPA-07-2016-0015
Sheikh, N., Laverge, J., & Delghust, M. (2024). A Critical Analysis of Institutional and Regulatory Framework for Building Stock Energy Efficiency and Transition in Pakistan. Environmental Science & Sustainable Development, 9(1), 32–41. https://doi.org/10.21625/essd.v9i1.1066
Shen, L., Yang, J., Zhang, R., Shao, C., & Song, X. (2019). The Benefits and Barriers for Promoting Bamboo as a Green Building Material in ChinaAn Integrative Analysis. SUSTAINABILITY, 11(9). https://doi.org/10.3390/su11092493
Sherif, M., Abotaleb, I., & Alqahtani, F. (2022). Application of Integrated Project Delivery (IPD) in the Middle East: Implementation and Challenges. BUILDINGS, 12(4). https://doi.org/10.3390/buildings12040467
Sherman, R., Naganathan, H., & Parrish, K. (2021). Energy Savings Results from Small Commercial Building Retrofits in the US. Energies, 14(19), 6207. https://doi.org/10.3390/en14196207
Shevchenko, A., Linovsky, S., & Skrobot, O. (2020). Geothermal Energy Use in Western Siberia and Prospects for Its Innovative Application in Construction. IOP Conference Series. Materials Science and Engineering, 953(1). https://doi.org/10.1088/1757-899X/953/1/012006
Shi, Q., Zuo, J., Huang, R., Huang, J., & Pullen, S. (2013). Identifying the critical factors for green construction—An empirical study in China. HABITAT INTERNATIONAL, 40, 1–8. https://doi.org/10.1016/j.habitatint.2013.01.003
Shibeika, A., T Abdel Raheem, & Hittini, B. (2019). Towards conceptual understanding for the adoption of building environmental sustainability assessment methods in the UAE built environment. IOP Conference Series. Earth and Environmental Science, 323(1). https://doi.org/10.1088/1755-1315/323/1/012185
Shilei, L., & Yong, W. (2009). Target-oriented obstacle analysis by PESTEL modeling of energy efficiency retrofit for existing residential buildings in China’s northern heating region. Energy Policy, 37(6), 2098–2101. https://doi.org/10.1016/j.enpol.2008.11.039
Shindo, K., Ikai, K., Shinoda, J., Matsumura, R., & Tanabe, S. (2024). Design and control of radiant heating and cooling systems in Japan: Results from expert interviews. JAPAN ARCHITECTURAL REVIEW, 7(1). https://doi.org/10.1002/2475-8876.12451
Shooshtarian, S., Hosseini, M., Kocaturk, T., Arnel, T., & Garofano, N. (2023). Circular economy in the Australian AEC industry: Investigation of barriers and enablers. BUILDING RESEARCH AND INFORMATION, 51(1), 56–68. https://doi.org/10.1080/09613218.2022.2099788
Shooshtarian, S., Maqsood, T., Caldera, S., & Ryley, T. (2022). The impact of regulations on construction and demolition waste market creation and stimulation: Australian stakeholders’ perception. IOP Conference Series. Earth and Environmental Science, 1101(6), 062012. https://doi.org/10.1088/1755-1315/1101/6/062012
Shooshtarian, S., Maqsood, T., Wong, P., Caldera, S., Ryley, T., Zaman, A., & Ruiz, A. (2024). Circular economy in action: The application of products with recycled content in construction projects—A multiple case study approach. SMART AND SUSTAINABLE BUILT ENVIRONMENT, 13(2), 370–394. https://doi.org/10.1108/SASBE-08-2023-0213
Simpeh, E., Smallwood, J., Ahadzie, D., & Mensah, H. (2023). Analytical taxonomy of challenges to the implementation of green building projects in South Africa. INTERNATIONAL JOURNAL OF CONSTRUCTION MANAGEMENT, 23(2), 286–296. https://doi.org/10.1080/15623599.2020.1863172
Simpson, K., Murtagh, N., & Owen, A. (2021). Domestic retrofit: Understanding capabilities of micro-enterprise building practitioners. Buildings & Cities, 2(1), 449. https://doi.org/10.5334/bc.106
Sin, O., Yusof, N., & Osmadi, A. (2021). Challenges of Green Office Implementation: A Case Study in Penang, Malaysia. INTERNATIONAL JOURNAL OF SUSTAINABLE CONSTRUCTION ENGINEERING AND TECHNOLOGY, 12(1), 153–163. https://doi.org/10.30880/ijscet.2021.12.01.015
Singh, A., Kumar, V., Hu, J., & Irfan, M. (2023). Investigation of barriers and mitigation strategies to blockchain technology implementation in construction industry: An interpretive structural modeling approach. ENVIRONMENTAL SCIENCE AND POLLUTION RESEARCH, 30(38), 89889–89909. https://doi.org/10.1007/s11356-023-28749-6
Singh, A., Kumar, V., Shoaib, M., Adebayo, T., & Irfan, M. (2023). A strategic roadmap to overcome blockchain technology barriers for sustainable construction: A deep learning-based dual-stage SEM-ANN approach. TECHNOLOGICAL FORECASTING AND SOCIAL CHANGE, 194. https://doi.org/10.1016/j.techfore.2023.122716
Singh, R., Walsh, P., & Mazza, C. (2019). Sustainable Housing: Understanding the Barriers to Adopting Net Zero Energy Homes in Ontario, Canada. SUSTAINABILITY, 11(22). https://doi.org/10.3390/su11226236
Siva, V., Hoppe, T., & Jain, M. (2017). Green Buildings in Singapore; Analyzing a Frontrunner’s Sectoral Innovation System. SUSTAINABILITY, 9(6). https://doi.org/10.3390/su9060919
Smedby, N. (2020). Limits to polycentricity? Institutional layering and policy feedbacks of building energy performance requirements in Sweden. ENVIRONMENTAL POLICY AND GOVERNANCE, 30(2), 71–83. https://doi.org/10.1002/eet.1874
Sodangi, M., & Kazmi, Z. (2020). Integrated Evaluation of the Impediments to the Adoption of Coconut Palm Wood as a Sustainable Material for Building Construction. SUSTAINABILITY, 12(18). https://doi.org/10.3390/su12187676
Soorige, D., Karunasena, G., Kulatunga, U., Mahmood, M. N., & De Silva, L. (2022). An Energy Culture Maturity Conceptual Framework on Adopting Energy-Efficient Technology Innovations in Buildings. Journal of Open Innovation : Technology, Market, and Complexity, 8(2), 60. https://doi.org/10.3390/joitmc8020060
Souaid, C., van der Heijden, H., & Elsinga, M. (2022). Perceived Barriers to Nearly Zero-Energy Housing: Empirical Evidence from Kilkenny, Ireland. Energies, 15(17), 6421. https://doi.org/10.3390/en15176421
Souleymane, D., & Ghiaus, C. (2023). Multi-Criteria Decision Analysis for Energy Retrofit of Residential Buildings: Methodology and Feedback from Real Application. Energies, 16(2), 902. https://doi.org/10.3390/en16020902
Soultana (Tanya) Saroglou, Itzhak-Ben-Shalom, H., & Meir, I. A. (2023). Climatic Variability in Altitude: Architecture, Thermal Comfort, and Safety along the Facade of a Residential Tower in the Mediterranean Climate. Buildings, 13(8), 1979. https://doi.org/10.3390/buildings13081979
Sourani, A., & Sohail, M. (2011). Barriers to addressing sustainable construction in public procurement strategies. PROCEEDINGS OF THE INSTITUTION OF CIVIL ENGINEERS-ENGINEERING SUSTAINABILITY, 164(4), 229–237. https://doi.org/10.1680/ensu.2011.164.4.229
Sovacool, B. (2017). Contestation, contingency, and justice in the Nordic low-carbon energy transition. ENERGY POLICY, 102, 569–582. https://doi.org/10.1016/j.enpol.2016.12.045
Sovacool, B., & Brossmann, B. (2010). Symbolic convergence and the hydrogen economy. ENERGY POLICY, 38(4), 1999–2012. https://doi.org/10.1016/j.enpol.2009.11.081
Staller, H., Tritthart, W., & Hajpál, M. (2010). LCA - USE AND BARRIERS (WOS:000288408300146). 617–620.
Stemmle, R., Hanna, R., Menberg, K., Østergaard, P. A., Jackson, M., Staffell, I., & Blum, P. (2024). Policies for aquifer thermal energy storage: International comparison, barriers and recommendations. Clean Technologies and Environmental Policy. https://doi.org/10.1007/s10098-024-02892-1
Stevenson, F., & Baborska-Narozny, M. (2018). Housing performance evaluation: Challenges for international knowledge exchange. Building Research and Information, 46(5), 501. https://doi.org/10.1080/09613218.2017.1357095
Stojanovska-Georgievska, L., Sandeva, I., & Spasevska, H. (2017). An Empirical Survey on the Awareness of Construction Developers about Green Buildings in Macedonia (WOS:000426982300038). 203–209.
Stojanovska-Georgievska, L., Sandeva, I., & Spasevska, H. (2018). AN EMPIRICAL SURVEY ON THE AWARENESS OF CONSTRUCTION DEVELOPERS ABOUT GREEN BUILDINGS IN MACEDONIA. THERMAL SCIENCE, 22, S897–S907. https://doi.org/10.2298/TSCI170915023S
Strachan, N. (2011). UK energy policy ambition and UK energy modelling-fit for purpose? ENERGY POLICY, 39(3), 1037–1040. https://doi.org/10.1016/j.enpol.2011.01.015
Streimikiene, D., & Balezentis, T. (2020). Willingness to Pay for Renovation of Multi-Flat Buildings and to Share the Costs of Renovation. ENERGIES, 13(11). https://doi.org/10.3390/en13112721
Struhala, K., & Ostry, M. (2022). Life-Cycle Assessment of phase-change materials in buildings: A review. JOURNAL OF CLEANER PRODUCTION, 336. https://doi.org/10.1016/j.jclepro.2022.130359
Suleman, T., Ezema, I., & Aderonmu, P. (2023). Challenges of circular design adoption in the Nigerian built environment: An empirical study. CLEANER ENGINEERING AND TECHNOLOGY, 17. https://doi.org/10.1016/j.clet.2023.100686
Sullivan, P. (2014). REDUCING ENERGY CONSUMPTION IN AMERICA’S GOVERNMENT BUILDINGS. Proceedings of the International Annual Conference of the American Society for Engineering Management, 1–1.
Sun, H., Fang, Y., Yin, M., & Shi, F. (2023). Research on the Restrictive Factors of Vigorous Promotion of Prefabricated Buildings in Yancheng under the Background of “Double Carbon.” SUSTAINABILITY, 15(2). https://doi.org/10.3390/su15021737
Sun, Y., Wang, J., Wu, J., Shi, W., Ji, D., Wang, X., & Zhao, X. (2020). Constraints Hindering the Development of High-Rise Modular Buildings. APPLIED SCIENCES-BASEL, 10(20). https://doi.org/10.3390/app10207159
Susskind, L., Chun, J., Gant, A., Hodgkins, C., Cohen, J., & Lohmar, S. (2022). Sources of opposition to renewable energy projects in the United States. ENERGY POLICY, 165. https://doi.org/10.1016/j.enpol.2022.112922
Iqbal, M., Ma, J., Ahmad, N., Hussain, K., Usmani, M. S., & Ahmad, M. (2021). Sustainable construction through energy management practices in developing economies: an analysis of barriers in the construction sector. Environmental Science and Pollution Research, 28, 34793-34823.
Svensson, I. (2021). Institutional Work Across Multiple Levels: The Case of Strategic Public Facilities Management in the Making (Doctoral dissertation, Chalmers Tekniska Hogskola (Sweden)).
Taat, N., Abas, N., & Hasmori, M. (2022). The Barriers of Building Information Modelling (BIM) for Construction Safety (WOS:000774710100015). 214, 121–130. https://doi.org/10.1007/978-981-16-7920-9_15
Tafazzoli, M., Shrestha, K., & Dang, H. (2024). Investigating Barriers to the Application of Automation in the Construction Industry (WOS:001196835000096). 941–950.
Taherkhani, R. (2023). Barriers to green building implementation in developing countries: The case of Iran. ENVIRONMENT DEVELOPMENT AND SUSTAINABILITY. https://doi.org/10.1007/s10668-023-03816-7
Tajani, F., Morano, P., Felicia Di Liddo, & Doko, E. (2022). A Model for the Assessment of the Economic Benefits Associated with Energy Retrofit Interventions: An Application to Existing Buildings in the Italian Territory. Applied Sciences, 12(7), 3385. https://doi.org/10.3390/app12073385
Tajima, N. (2022). Research on the Regeneration Procedure for Reutilizing Vacant Housing Stock in Japan. IOP Conference Series. Earth and Environmental Science, 1101(4), 042021. https://doi.org/10.1088/1755-1315/1101/4/042021
Takyi-Annan, G., & Zhang, H. (2023). Assessing the impact of overcoming BIM implementation barriers on BIM usage frequency and circular economy in the project lifecycle using Partial least Squares structural Equation modelling (PLS-SEM) analysis. ENERGY AND BUILDINGS, 295. https://doi.org/10.1016/j.enbuild.2023.113329
Talele, S., Traylor, C., Arpan, L., Curley, C., Chien-Fei, C., Day, J., Feiock, R., Hadzikadic, M., Tolone, W. J., Ingman, S., Yeatts, D., Karaguzel, O. T., Lam, K. P., Menassa, C., Pevnitskaya, S., Spiegelhalter, T., Yan, W., Zhu, Y., & Tao, Y. X. (2018). Energy modeling and data structure framework for Sustainable Human-Building Ecosystems (SHBE)—A review. Frontiers in Energy, 12(2), 314–332. h…
Tarpio, J., Huuhka, S., & Vestergaard, I. (2022). Barriers to implementing adaptable housing: Architects’ perceptions in Finland and Denmark. Journal of Housing and the Built Environment, 37(4), 1859–1881. https://doi.org/10.1007/s10901-021-09913-1
Tehami, M., & Seddiki, M. (2023). Investigation toward the Adoption of Building Information Modelling in Algeria from Architects’ Perspective. Journal of Construction in Developing Countries, 28(2), 329–352. https://doi.org/10.21315/jcdc-08-22-0148
Teixeira, I., Ferreira, A. C., Rodrigues, N., & Teixeira, S. (2024). Energy Poverty and Its Indicators: A Multidimensional Framework from Literature. Energies, 17(14), 3445. https://doi.org/10.3390/en17143445
Terblanche, R. (2019). Achieving net zero status in South Africa (WOS:000562136800181). 323. https://doi.org/10.1088/1755-1315/323/1/012182
Teresa Diaz Gonçalves & José Saporiti Machado. (2023). Origins of the Sustainability Concept and Its Application to the Construction Sector in the EU. Sustainability, 15(18), 13775. https://doi.org/10.3390/su151813775
Thao Thi Phuong Bui, Wilkinson, S., Niluka Domingo, & MacGregor, C. (2021). Zero Carbon Building Practices in Aotearoa New Zealand. Energies, 14(15), 4455. https://doi.org/10.3390/en14154455
The role of European municipalities and regions in financing energy upgrades in buildings. (n.d.). 26.
Thirumal, S., Udawatta, N., Karunasena, G., & Al-Ameri, R. (2024). Barriers to Adopting Digital Technologies to Implement Circular Economy Practices in the Construction Industry: A Systematic Literature Review. Sustainability, 16(8), 3185.
Thomas, T., & Praveen, A. (2020). Emergy parameters for ensuring sustainable use of building materials. JOURNAL OF CLEANER PRODUCTION, 276. https://doi.org/10.1016/j.jclepro.2020.122382
Thomson, L., & Jenkins, D. (2023). The Use of Real Energy Consumption Data in Characterising Residential Energy Demand with an Inventory of UK Datasets. Energies, 16(16), 6069. https://doi.org/10.3390/en16166069
Tian, L., Wright, A., Painter, B., & Pazhoohesh, M. (2023). Factors influencing BIM use in green building construction project management in the UK and China. BUILDING RESEARCH AND INFORMATION, 51(7), 853–870. https://doi.org/10.1080/09613218.2023.2213356
Tigani, D., D van Kan, Tennakoon, G., Geng, L., & Chan, M. (2024). Measuring Embodied Carbon of Buildings: A Review of Methodologies and Benchmarking Towards Net Zero. IOP Conference Series. Earth and Environmental Science, 1363(1), 012030. https://doi.org/10.1088/1755-1315/1363/1/012030
Timilsina, G. R., & Malla, S. (2023). Do Investments in Clean Technologies Reduce Production Costs? Insights from the Literature. Economics of Energy & Environmental Policy, 12(1). https://doi.org/10.5547/2160-5890.12.1.gtim
Tirelli, D., & Besana, D. (2023). Moving toward Net Zero Carbon Buildings to Face Global Warming: A Narrative Review. BUILDINGS, 13(3). https://doi.org/10.3390/buildings13030684
Topriska, E., Kolokotroni, M., Melandri, D., McGuiness, S., Ceclan, A., Christoforidis, G., Fazio, V., Hadjipanayi, M., Hendrick, P., Kacarska, M., Lopez, E., Petersen, K., & Steinbrecher, J. (2018). The Social, Educational, and Market Scenario for nZEB in Europe. BUILDINGS, 8(4). https://doi.org/10.3390/buildings8040051
Torbaghan, S., Gibescu, M., Rawn, B., Müller, H., Roggenkamp, M., & van der Meijden, M. (2015). Investigating the impact of unanticipated market and construction delays on the development of a meshed HVDC grid using dynamic transmission planning. IET GENERATION TRANSMISSION & DISTRIBUTION, 9(15), 2224–2233. https://doi.org/10.1049/iet-gtd.2014.1068
Torcellini, P., PhD PE, MacCracken, M., PE, Narayanamurthy, R., Deru, M., PhD, & Lowe, B. (2021). Energy Storage: Helping Move Toward A Sustainable Future. ASHRAE Journal, 63(7), 24–32.
Torgautov, B., Zhanabayev, A., Tleuken, A., Turkyilmaz, A., Mustafa, M., & Karaca, F. (2021). Circular Economy: Challenges and Opportunities in the Construction Sector of Kazakhstan. Buildings, 11(11), 501. https://doi.org/10.3390/buildings11110501
Toriola-Coker, L. O., Alaka, H., Bello, W. A., Ajayi, S., Adeniyi, A., & Olopade, S. O. (2021). Sustainability Barriers in Nigeria Construction Practice. IOP Conference Series. Materials Science and Engineering, 1036(1). https://doi.org/10.1088/1757-899X/1036/1/012023
Labaran, Y. H., Mato, H., Saini, G., & Musa, A. A. (2024). Towards net zero energy buildings: A review of barriers and facilitators to the adoption of building energy efficiency practices. Environmental Research and Technology, 7(1), 118-130.
Toxopeus, H., & Polzin, F. (2021). Reviewing financing barriers and strategies for urban nature-based solutions. JOURNAL OF ENVIRONMENTAL MANAGEMENT, 289. https://doi.org/10.1016/j.jenvman.2021.112371
Toyin, J., & Mewomo, M. (2023). An investigation of barriers to the application of building information modelling in Nigeria. JOURNAL OF ENGINEERING DESIGN AND TECHNOLOGY, 21(2), 442–468. https://doi.org/10.1108/JEDT-10-2021-0594
Tozer, L. (2019). Deep Decarbonization in Practice: Solutions and Challenges for Low-Carbon Building Retrofi ts. Canadian Journal of Urban Research, 28(2), 32–45.
Tozer, L. (2020). Catalyzing political momentum for the effective implementation of decarbonization for urban buildings. ENERGY POLICY, 136. https://doi.org/10.1016/j.enpol.2019.111042
Tran, Q., & Huang, D. (2022). Using PLS-SEM to analyze challenges hindering success of green building projects in Vietnam. JOURNAL OF ECONOMICS AND DEVELOPMENT, 24(1), 47–64. https://doi.org/10.1108/JED-04-2020-0033
Travezan, J., Harmsen, R., & van Toledo, G. (2013). Policy analysis for energy efficiency in the built environment in Spain. ENERGY POLICY, 61, 317–326. https://doi.org/10.1016/j.enpol.2013.05.096
Trencher, G., Broto, V., Takagi, T., Sprigings, Z., Nishida, Y., & Yarime, M. (2016). Innovative policy practices to advance building energy efficiency and retrofitting: Approaches, impacts and challenges in ten C40 cities. ENVIRONMENTAL SCIENCE & POLICY, 66, 353–365. https://doi.org/10.1016/j.envsci.2016.06.021
Triolo, R. C. (n.d.). EFFICIENT ELECTRICITY SYSTEMS UNDER HIGH PENETRATION OF RENEWABLE AND DISTRIBUTED RESOURCES.
Tsoumanis, G., Formiga, J., Bilo, N., Tsarchopoulos, P., Ioannidis, D., & Tzovaras, D. (2021). The Smart Evolution of Historical Cities: Integrated Innovative Solutions Supporting the Energy Transition while Respecting Cultural Heritage. Sustainability, 13(16), 9358. https://doi.org/10.3390/su13169358
Tuerk, A., Frieden, D., Neumann, C., Latanis, K., Tsitsanis, A., Kousouris, S., Llorente, J., Heimonen, I., Reda, F., Ala-Juusela, M., Allaerts, K., Caerts, C., Schwarzl, T., Ulbrich, M., Stosch, A., & Ramschak, T. (2021). Integrating Plus Energy Buildings and Districts with the EU Energy Community Framework: Regulatory Opportunities, Barriers and Technological Solutions. Buildings, 11(10), 468. …
Tykkä, S., McCluskey, D., Nord, T., Ollonqvist, P., Hugosson, M., Roos, A., Ukrainski, K., Nyrud, A., & Bajric, F. (2010). Development of timber framed firms in the construction sector—Is EU policy one source of their innovation? FOREST POLICY AND ECONOMICS, 12(3), 199–206. https://doi.org/10.1016/j.forpol.2009.10.003
Udeaja, C., Ekundayo, D., Zhou, L., & Perera, S. (2013). Material Waste in the Construction Industry: A Review of the Legislative and Supply Chain Issues. In REUSE OF MATERIALS AND BYPRODUCTS IN CONSTRUCTION: WASTE MINIMIZATION AND RECYCLING (WOS:000332603200003; pp. 5–27). https://doi.org/10.1007/978-1-4471-5376-4_210.1007/978-1-4471-5376-4
Ullah, K., Witt, E., & Lill, I. (2022). The BIM-Based Building Permit Process: Factors Affecting Adoption. Buildings, 12(1), 45. https://doi.org/10.3390/buildings12010045
Unuigbe, M., Sambo Lyson Zulu, & Johnston, D. (2022). Exploring Factors Influencing Renewable Energy Diffusion in Commercial Buildings in Nigeria: A Grounded Theory Approach. Sustainability, 14(15), 9726. https://doi.org/10.3390/su14159726
Vaidya, P., Greden, L., Eijadi, D., Mcdougall, T., & Cole, R. (2009). Integrated cost-estimation methodology to support high-performance building design. Energy Efficiency, 2(1), 69. https://doi.org/10.1007/s12053-008-9028-4
Valentini, O., Andreadou, N., Bertoldi, P., Lucas, A., Saviuc, I., & Kotsakis, E. (2022). Demand Response Impact Evaluation: A Review of Methods for Estimating the Customer Baseline Load. ENERGIES, 15(14). https://doi.org/10.3390/en15145259
van Reenen, C. A. (2020). Establishing a Heuristic Framework for Effective Attenuation of Traffic Noise Transmission in Typical Naturally Ventilated Classrooms in Urban Schools in Gauteng, South Africa. PQDT - Global. https://ezproxy.bu.edu/login?qurl=https://www.proquest.com/docview/2901488533?accountid=9676&bdid=77468&_bd=tqnm4S0sJBI5V9WKQzjBc00EDyw%3D
Vassiliades, C., Minterides, C., Astara, O., Barone, G., & Vardopoulos, I. (2023). Socio-Economic Barriers to Adopting Energy-Saving Bioclimatic Strategies in a Mediterranean Sustainable Real Estate Setting: A Quantitative Analysis of Resident Perspectives. ENERGIES, 16(24). https://doi.org/10.3390/en16247952
Velichko, E., & Tskhovrebov, E. (2018). Insights into the state of affairs and possible ways to improve secondary material waste management (WOS:000567656900202). 196. https://doi.org/10.1051/matecconf/201819604066
Veliz, K., Walters, J., Busco, C., & Vargas, M. (2023). Modeling barriers to a circular economy for construction demolition waste in the Aysen region of Chile. RESOURCES CONSERVATION & RECYCLING ADVANCES, 18. https://doi.org/10.1016/j.rcradv.2023.200145
Viness, T. (2016). A Case Study of Construction Challenges and Solutions: Installation of Exterior Insulation and Finish System (EIFS) to an Existing Residential Structure (WOS:000389160600013). 1585, 197–215. https://doi.org/10.1520/STP158520140113
Vivian, J., Chinello, M., Zarrella, A., & De Carli, M. (2022). Investigation on Individual and Collective PV Self-Consumption for a Fifth Generation District Heating Network. Energies, 15(3), 1022. https://doi.org/10.3390/en15031022
Vossos, V., Gerber, D., Gaillet-Tournier, M., Nordman, B., Brown, R., Heredia, W., Ghatpande, O., Saha, A., Arnold, G., & Frank, S. (2022). Adoption Pathways for DC Power Distribution in Buildings. ENERGIES, 15(3). https://doi.org/10.3390/en15030786
Wang, H., Pen-Chi Chiang, Cai, Y., Li, C., Wang, X., Tse-Lun, C., Wei, S., & Huang, Q. (2018). Application of Wall and Insulation Materials on Green Building: A Review. Sustainability, 10(9), 3331. https://doi.org/10.3390/su10093331
Wang, J., He, B., Wang, H., & Santamouris, M. (2019). Towards higher quality green building agenda—An overview of the application of green building techniques in China. SOLAR ENERGY, 193, 473–493. https://doi.org/10.1016/j.solener.2019.09.089
Wang, Q., Shen, C., Guo, Z., Zhu, K., Zhang, J., & Huang, M. (2023). Research on the Barriers and Strategies to Promote Prefabricated Buildings in China. BUILDINGS, 13(5). https://doi.org/10.3390/buildings13051200
Wang, S., & Chen, Q. (2024). Development of a Cloud-Based Building Information Modeling Design Configurator to Auto-Link Material Catalogs with Code-Compliant Designs of Residential Buildings. BUILDINGS, 14(7). https://doi.org/10.3390/buildings14072084
Wang, T., & Feng, J. (2022). Linking BIM Definition, BIM Capability Maturity, and Integrated Project Delivery in the AECO Industry: The Influences of BIM Diffusion and Moral Hazard. Journal of Urban Planning and Development, 148(3). https://doi.org/10.1061/(ASCE)UP.1943-5444.0000839
Wang, X., Teigland, R., & Hollberg, A. (2022). A Pathway to Climate Neutral Buildings: Definitions, Policy and Stakeholder Understanding in Sweden and China. IOP Conference Series. Earth and Environmental Science, 1078(1), 012122. https://doi.org/10.1088/1755-1315/1078/1/012122
Wang, X., Yuan, J., You, K., Ma, X., & Li, Z. (2023). Using Real Building Energy Use Data to Explain the Energy Performance Gap of Energy-Efficient Residential Buildings: A Case Study from the Hot Summer and Cold Winter Zone in China. Sustainability, 15(2), 1575. https://doi.org/10.3390/su15021575
Wang, Y. (2018). Overview of State Policies for Energy Efficiency in Buildings. Current Sustainable / Renewable Energy Reports, 5(1), 101–108. https://doi.org/10.1007/s40518-018-0100-1
Wang, Y., Chong, D., & Liu, X. (2021). Evaluating the Critical Barriers to Green Construction Technologies Adoption in China. SUSTAINABILITY, 13(12). https://doi.org/10.3390/su13126510
Waqar, A., Alharbi, L., Alotaibi, F., Alrasheed, K., Khan, A., & Almujibah, H. (2024). Challenges of Blockchain Implementation in Construction. JOURNAL OF ENGINEERING, 2024. https://doi.org/10.1155/2024/2442345
Waqar, A., Othman, I., Falqi, I., Almujibah, H., Alshehri, A., Alsulamy, S., & Benjeddou, O. (2023). Assessment of Barriers to Robotics Process Automation (RPA) Implementation in Safety Management of Tall Buildings. BUILDINGS, 13(7). https://doi.org/10.3390/buildings13071663
Waqar, A., Othman, I., Saad, N., Qureshi, A., Azab, M., & Khan, A. (2023). Complexities for adopting 3D laser scanners in the AEC industry: Structural equation modeling. APPLICATIONS IN ENGINEERING SCIENCE, 16. https://doi.org/10.1016/j.apples.2023.100160
Waqar, A., Qureshi, A., & Alaloul, W. (2023). Barriers to Building Information Modeling (BIM) Deployment in Small Construction Projects: Malaysian Construction Industry. SUSTAINABILITY, 15(3). https://doi.org/10.3390/su15032477
Waqar, A., Shafiq, N., Othman, I., Alsulamy, S., Alshehri, A., & Falqi, I. (2024). Deterrents to the IoT for smart buildings and infrastructure development: A partial least square modeling approach. HELIYON, 10(10). https://doi.org/10.1016/j.heliyon.2024.e31035
Wardani, S., Handayani, N., & Wibowo, M. (2022). Barriers for Implementing Reverse Logistics in the Construction Sectors. JOURNAL OF INDUSTRIAL ENGINEERING AND MANAGEMENT-JIEM, 15(3), 385–415. https://doi.org/10.3926/jiem.3539
Warren-Myers, G., Moosavi, S., Hurlimann, A., Raisbeck, P., Bush, J., March, A., & Browne, G. (2024). Barriers to and facilitators of climate change action in architecture practice. JOURNAL OF CLEANER PRODUCTION, 469. https://doi.org/10.1016/j.jclepro.2024.143149
Wasse, A., & Dai, K. (2024). Building Information Modeling Adoption, Implementation, and Challenges in the Ethiopian Construction Industry. JOURNAL OF ARCHITECTURAL ENGINEERING, 30(3). https://doi.org/10.1061/JAEIED.AEENG-1657
Weber, M., Pressburger, L., Chau, L., Khan, Z., Waite, T., Westphal, M., Ling, G., Ho, C., & Evans, M. (2024). Carbon neutrality in Malaysia and Kuala Lumpur: Insights from stakeholder-driven integrated assessment modeling. FRONTIERS IN ENERGY RESEARCH, 12. https://doi.org/10.3389/fenrg.2024.1336045
Weiss, J., Dunkelberg, E., & Vogelpohl, T. (2012). Improving policy instruments to better tap into homeowner refurbishment potential: Lessons learned from a case study in Germany. ENERGY POLICY, 44, 406–415. https://doi.org/10.1016/j.enpol.2012.02.006
Welege, N., Pan, W., & Kumaraswamy, M. (2023a). Engaging Stakeholders to Overcome the Common Constraints for Delivering Low Carbon Buildings in High-Rise High-Density Cities. JOURNAL OF CONSTRUCTION ENGINEERING AND MANAGEMENT, 149(1). https://doi.org/10.1061/JCEMD4.COENG-12327
Welege, N., Pan, W., & Kumaraswamy, M. (2023b). Stakeholder collaboration to mitigate constraints to delivering low-carbon buildings: Insights from high-rise high-density cities. ENGINEERING CONSTRUCTION AND ARCHITECTURAL MANAGEMENT. https://doi.org/10.1108/ECAM-02-2022-0166
Whitman, C., Prizeman, O., Walker, P., & Gwilliam, J. (2020). Heritage retrofit and cultural empathy; a discussion of challenges regarding the energy performance of historic UK timber-framed dwellings. INTERNATIONAL JOURNAL OF BUILDING PATHOLOGY AND ADAPTATION, 38(2), 386–404. https://doi.org/10.1108/IJBPA-02-2019-0023
Wiik, M. K. (2023). A comparative assessment of the development of GHG emission criteria and benchmark values for buildings in Norway. Journal of Physics: Conference Series, 2654(1), 012131. https://doi.org/10.1088/1742-6596/2654/1/012131
Wijesiri, W. M. M., Devapriya, K. A. K., Rathnasiri, P., & Tharindu Lakruwan Wickremanayake Karunaratne. (2022). A framework to implement green adaptive reuse for existing buildings in Sri Lanka. Intelligent Buildings International, 14(5), 581–605. https://doi.org/10.1080/17508975.2021.1906204
Willan, C., Janda, K. B., & Kenington, D. (2021). Seeking the Pressure Points: Catalysing Low Carbon Changes from the Middle-Out in Offices and Schools. Energies, 14(23), 8087. https://doi.org/10.3390/en14238087
Williams, J., Jones, R., & Torn, M. (2021). Observations on the transition to a net-zero energy system in the United States. ENERGY AND CLIMATE CHANGE, 2. https://doi.org/10.1016/j.egycc.2021.100050
Williams, M., Parker, C., Dillon, A., Billings, B., & Powell, K. (2024). Sustainability and affordability of building electrification: A state-by-state holistic approach for multifamily buildings. SUSTAINABLE CITIES AND SOCIETY, 109. https://doi.org/10.1016/j.scs.2024.105515
Wilson, E., Munankarmi, P., Less, B., Reyna, J., & Rothgeb, S. (2024). Heat pumps for all? Distributions of the costs and benefits of residential air-source heat pumps in the United States. JOULE, 8(4). https://doi.org/10.1016/j.joule.2024.01.022
Wimala, M., Akmalah, E., & Sururi, M. (2016). Breaking through the Barriers to Green Building Movement in Indonesia: Insights from Building Occupants (WOS:000390613000071). 100, 469–474. https://doi.org/10.1016/j.egypro.2016.10.204
Wise, F., Moncaster, A., & Jones, D. (2021). Rethinking retrofit of residential heritage buildings. Buildings & Cities, 2(1), 495. https://doi.org/10.5334/bc.94
Wolf, A. (2022). Lumber Lowdown. Builder, 45(3), 20.
Wong, F., Oldfield, P., & Osmond, P. (2024). Industry perceptions of mass engineered timber (MET) construction: A comparison of South-East Asia with other regions. ARCHITECTURAL ENGINEERING AND DESIGN MANAGEMENT. https://doi.org/10.1080/17452007.2024.2401561
Wróblewski, P., & Niekurzak, M. (2022). Assessment of the Possibility of Using Various Types of Renewable Energy Sources Installations in Single-Family Buildings as Part of Saving Final Energy Consumption in Polish Conditions. Energies, 15(4), 1329. https://doi.org/10.3390/en15041329
Wu, P., Jin, R., Xu, Y., Lin, F., Dong, Y., & Pan, Z. (2021). THE ANALYSIS OF BARRIERS TO BIM IMPLEMENTATION FOR INDUSTRIALIZED BUILDING CONSTRUCTION: A CHINA STUDY. JOURNAL OF CIVIL ENGINEERING AND MANAGEMENT, 27(1), 1–13. https://doi.org/10.3846/jcem.2021.14105
Wu, Y., Wu, Y., Cimen, H., Vasquez, J., & Guerrero, J. (2022). Towards collective energy Community: Potential roles of microgrid and blockchain to go beyond P2P energy trading. APPLIED ENERGY, 314. https://doi.org/10.1016/j.apenergy.2022.119003
Wu, Z., Jiang, M., Cai, Y., Wang, H., & Li, S. (2019). What Hinders the Development of Green Building? An Investigation of China. INTERNATIONAL JOURNAL OF ENVIRONMENTAL RESEARCH AND PUBLIC HEALTH, 16(17). https://doi.org/10.3390/ijerph16173140
Wuni, I., Abankwa, D., Koc, K., Adukpo, S., & Antwi-Afari, M. (2024). Critical barriers to the adoption of integrated digital delivery in the construction industry. JOURNAL OF BUILDING ENGINEERING, 83. https://doi.org/10.1016/j.jobe.2024.108474
Xia, X. M., & Wang, F. (2020). Economic Feasibility and Comprehensive Benefit Evaluation of Rural Household Biogas Utilization: Evidence from China. IOP Conference Series. Earth and Environmental Science, 510(3). https://doi.org/10.1088/1755-1315/510/3/032034
Xia-Bauer, C., Gokarakonda, S., Guo, S., Filippidou, F., Thomas, S., Maheshwari, J., & Vishwanathan, S. (2024). Comparative analysis of residential building decarbonization policies in major economies: Insights from the EU, China, and India. ENERGY EFFICIENCY, 17(5). https://doi.org/10.1007/s12053-024-10225-w
Xian, S., & Chen, H. (2015). Revitalisation of industrial buildings in Hong Kong: New measures, new constraints? HABITAT INTERNATIONAL, 47, 298–306. https://doi.org/10.1016/j.habitatint.2015.02.004
Xiao, H., Lai, W., Chen, A., Lai, S., He, W., Deng, X., Zhang, C., & Ren, H. (2024). Application of Photovoltaic and Solar Thermal Technologies in Buildings: A Mini-Review. Coatings, 14(3), 257. https://doi.org/10.3390/coatings14030257
Xing, R., Hanaoka, T., Kanamori, Y., & Masui, T. (2018). Achieving zero emission in China’s urban building sector: Opportunities and barriers. Current Opinion in Environmental Sustainability, 30, 115–122. https://doi.org/10.1016/j.cosust.2018.05.005
Xu, L., Cherian, J., Zaheer, M., Muhammad Safdar Sial, Comite, U., Cismas, L. M., Juan Felipe Espinosa Cristia, & Oláh, J. (2022). The Role of Healthcare Employees’ Pro-Environmental Behavior for De-Carbonization: An Energy Conservation Approach from CSR Perspective. Energies, 15(9), 3429. https://doi.org/10.3390/en15093429
Xu, P., Chan, E., & Lam, P. (2009). A Framework for Energy Efficiency Retrofits of Existing Buildings (EEREB) in China (WOS:000281119900076). 501–507.
Xu, Y., Chong, H., & Chi, M. (2023). Modelling the blockchain adoption barriers in the AEC industry. ENGINEERING CONSTRUCTION AND ARCHITECTURAL MANAGEMENT, 30(1), 125–153. https://doi.org/10.1108/ECAM-04-2021-0335
Xu, Y., Zhang Ruijie, Fan Xiaomin, & Wang Qiutong. (2022). How does green technology innovation affect urbanization? An empirical study from provinces of China. Environmental Science and Pollution Research, 29(24), 36626–36639. https://doi.org/10.1007/s11356-021-18117-7
Xu, Z., Li, X., Ma, L., Lu, Y., & Liu, G. (2024). Unraveling the Knowledge Roadmap of Building Policy Mixes: A Scientometric Analysis. SUSTAINABILITY, 16(1). https://doi.org/10.3390/su16010428
Yan, R., Xiang, X., Cai, W., & Ma, M. (2022). Decarbonizing residential buildings in the developing world: Historical cases from China. SCIENCE OF THE TOTAL ENVIRONMENT, 847. https://doi.org/10.1016/j.scitotenv.2022.157679
Yang, H., Gao, W., Wei, X., Wang, Y., & Li, Y. (2024). Techno-economic comparative analysis of PV third–party ownership between customer and developer sides in Japan. Journal of Energy Storage, 80, 110062. https://doi.org/10.1016/j.est.2023.110062
Yang, P. (2022). Urban expansion of Energiewende in Germany: A systematic bibliometric analysis and literature study. ENERGY SUSTAINABILITY AND SOCIETY, 12(1). https://doi.org/10.1186/s13705-022-00373-1
Yang, Y., Chew, B., Loo, H., & Tan, L. (2017). Green Commercial Building Insurance in Malaysia (WOS:000405771500070). 1818. https://doi.org/10.1063/1.4976935
Yasser Yahya Al-Ashmori, Idris Bin Othman, Hisham Bin Mohamad, Rahmawati, Y., & Napiah, M. (2019). Establishing the Level of BIM implementation – A Case Study in Melaka, Malaysia. IOP Conference Series. Materials Science and Engineering, 601(1). https://doi.org/10.1088/1757-899X/601/1/012024
Ye, Y., Dehwah, A., Faulkner, C., Sathyanarayanan, H., & Lei, X. (2023). A Perspective of Decarbonization Pathways in Future Buildings in the United States. BUILDINGS, 13(4). https://doi.org/10.3390/buildings13041003
Yeoh, J., Lee, S., & Ong, K. (2018). Development of a BIM-Based Framework to Support the Analysis of “Design-for-Disassembly” Strategies (WOS:000541103300075). 759–768.
Yeung, H., Ridwan, T., Tariq, S., & Zayed, T. (2022). BEAM Plus implementation in Hong Kong: Assessment of challenges and policies. INTERNATIONAL JOURNAL OF CONSTRUCTION MANAGEMENT, 22(14), 2830–2844. https://doi.org/10.1080/15623599.2020.1827692
Yin, B., Laing, R., Leon, M., & Mabon, L. (2018). An evaluation of sustainable construction perceptions and practices in Singapore. SUSTAINABLE CITIES AND SOCIETY, 39, 613–620. https://doi.org/10.1016/j.scs.2018.03.024
York, J., Vedula, S., & Lenox, M. (2018). IT’S NOT EASY BUILDING GREEN: THE IMPACT OF PUBLIC POLICY, PRIVATE ACTORS, AND REGIONAL LOGICS ON VOLUNTARY STANDARDS ADOPTION. ACADEMY OF MANAGEMENT JOURNAL, 61(4), 1492–1523. https://doi.org/10.5465/amj.2015.0769
Young, R. A. (2012). Stewardship of the Built Environment; Sustainability, Preservation, and Reuse. Stewardship of the Built Environment. https://ezproxy.bu.edu/login?qurl=https://www.proquest.com/docview/2131850619?accountid=9676&bdid=77468&_bd=07D5kcoJjDqtehmYWHkA%2FrJ6eDU%3D
Youssef, E., Zaid, R., & Mohamed, E. K. (2022). Economic barriers to green innovations in Morocco: The case of a zero-energy house. IOP Conference Series. Earth and Environmental Science, 975(1), 012005. https://doi.org/10.1088/1755-1315/975/1/012005
Yu, M. G., PhD, Ma, X., PhD, Huang, B., PhD, Devaprasad, K., Brown, F., PhD, & Wu, D., PhD. (2024). Enhancing Building Energy Efficiency through Advanced Sizing and Dispatch Methods for Energy Storage. ASHRAE Transactions, 130, 512–519.
Yuan, H. (2017). Barriers and countermeasures for managing construction and demolition waste: A case of Shenzhen in China. JOURNAL OF CLEANER PRODUCTION, 157, 84–93. https://doi.org/10.1016/j.jclepro.2017.04.137
Yuan, Z., Ni, G., Wang, L., Qiao, Y., Sun, C., Xu, N., & Wang, W. (2020). Research on the Barrier Analysis and Strength Measurement of a Prefabricated Building Design. SUSTAINABILITY, 12(7). https://doi.org/10.3390/su12072994
Zachariadis, T., Michopoulos, A., Vougiouklakis, Y., Piripitsi, K., Ellinopoulos, C., & Struss, B. (2018). Determination of Cost-Effective Energy Efficiency Measures in Buildings with the Aid of Multiple Indices. Energies, 11(1), 191. https://doi.org/10.3390/en11010191
Zalina Shari, & Soebarto, V. (2014). Investigating sustainable practices in the Malaysian office building developments. Construction Innovation, 14(1), 17–37. https://doi.org/10.1108/CI-12-2012-0064
Zaman, A., Chan, Y., Jonescu, E., & Stewart, I. (2022). Critical Challenges and Potential for Widespread Adoption of Mass Timber Construction in Australia-An Analysis of Industry Perceptions. BUILDINGS, 12(9). https://doi.org/10.3390/buildings12091405
Zambrano-Prado, P., Orsini, F., Rieradevall, J., Josa, A., & Gabarrell, X. (2021). Potential Key Factors, Policies, and Barriers for Rooftop Agriculture in EU Cities: Barcelona, Berlin, Bologna, and Paris. FRONTIERS IN SUSTAINABLE FOOD SYSTEMS, 5. https://doi.org/10.3389/fsufs.2021.733040
Zapata-Lancaster, G. (2014). Low carbon non-domestic building design process. An ethnographic comparison of design in Wales and England. Structural Survey, 32(2), 140. https://doi.org/10.1108/SS-07-2013-0029
Zapata-Lancaster, G., & Tweed, C. (2014). Designers’ enactment of the policy intentions. An ethnographic study of the adoption of energy regulations in England and Wales. ENERGY POLICY, 72, 129–139. https://doi.org/10.1016/j.enpol.2014.04.033
Železná, J., Felicioni, L., Trubina, N., Vlasatá, B., Růžička, J., & Veselka, J. (2024). Whole Life Carbon Assessment of Buildings: The Process to Define Czech National Benchmarks. Buildings, 14(7), 1936. https://doi.org/10.3390/buildings14071936
Zeno, B., Schnieders Jürgen, Conner, W., Kaufmann Berthold, Lepp Laszlo, Norwood Zack, Simmonds, A., & Theoboldt Ingo. (2022). Retrofit with Passive House components. Energy Efficiency, 15(1). https://doi.org/10.1007/s12053-021-10008-7
Zhang, F., Deng, H., Margolis, R., & Su, J. (2015). Analysis of distributed-generation photovoltaic deployment, installation time and cost, market barriers, and policies in China. Energy Policy, 81, 43–43.
Zhang, G., & Setunge, S. (2009). Critical Factors Influencing Building Service Upgrade in Heritage Property (WOS:000281119901091). 2049–2056.
Zhang, H., Hewage, K., Karunathilake, H., Feng, H., & Sadiq, R. (2021). Research on policy strategies for implementing energy retrofits in the residential buildings. JOURNAL OF BUILDING ENGINEERING, 43. https://doi.org/10.1016/j.jobe.2021.103161
Zhang, L., & Zhou, J. (2015). Drivers and barriers of developing low-carbon buildings in China: Real estate developers’ perspectives. International Journal of Environmental Technology and Management, 18(3), 254.
Zhang, L., Song, G., Ma, X., Zhan, C., & Zhang, S. (2020). Decarbonising residential building energy towards achieving the intended nationally determined contribution at subnational level under uncertainties. JOURNAL OF CLEANER PRODUCTION, 272. https://doi.org/10.1016/j.jclepro.2020.122760
Zhang, N., Hwang, B., Deng, X., & Tay, F. (2020). Collaborative contracting in the Singapore construction industry: Current status, major barriers and best solutions. ENGINEERING CONSTRUCTION AND ARCHITECTURAL MANAGEMENT, 27(10), 3115–3133. https://doi.org/10.1108/ECAM-08-2019-0451
Zhang, S., Xiang, X., Ma, Z., Ma, M., & Zou, C. (2021). Carbon Neutral Roadmap of Commercial Building Operations by Mid-Century: Lessons from China. BUILDINGS, 11(11). https://doi.org/10.3390/buildings11110510
Zhang, Y., Wang, H., Gao, W., Wang, F., Zhou, N., Kammen, D. M., & Ying, X. (2019). A Survey of the Status and Challenges of Green Building Development in Various Countries. Sustainability, 11(19), 5385. https://doi.org/10.3390/su11195385
Zhao, L., Zhang, L., Sun, J., & He, P. (2022). Can public participation constraints promote green technological innovation of Chinese enterprises? The moderating role of government environmental regulatory enforcement. TECHNOLOGICAL FORECASTING AND SOCIAL CHANGE, 174. https://doi.org/10.1016/j.techfore.2021.121198
Zhao, X., Hwang, B., & Lu, Q. (2018). Typology of business model innovations for delivering zero carbon buildings. JOURNAL OF CLEANER PRODUCTION, 196, 1213–1226. https://doi.org/10.1016/j.jclepro.2018.06.018
Zheng, M., & Jørgensen, B. N. (2018). A discussion of building automation and stakeholder engagement for the readiness of energy flexible buildings. Energy Informatics, 1(1). https://doi.org/10.1186/s42162-018-0061-z
Zheng, X., Sun, C., & Liu, J. (2024). Exploring stakeholder engagement in urban village renovation projects through a mixed-method approach to social network analysis: A case study of Tianjin. HUMANITIES & SOCIAL SCIENCES COMMUNICATIONS, 11(1). https://doi.org/10.1057/s41599-023-02536-7
Zhou, Y., & Herr, C. M. (2023). A Review of Advanced Façade System Technologies to Support Net-Zero Carbon High-Rise Building Design in Subtropical China. Sustainability, 15(4), 2913. https://doi.org/10.3390/su15042913
Zilberova, I., Mailyan, V., & Zilberov, R. (2023). Organization of major repairs of apartment buildings with energy-saving technologies. E3S Web of Conferences, 376, n/a. https://doi.org/10.1051/e3sconf/202337603022
zu Ermgassen, S., Drewniok, M., Bull, J., Walker, C., Mancini, M., Ryan-Collins, J., & Serrenho, A. (2022). A home for all within planetary boundaries: Pathways for meeting England?s housing needs without transgressing national climate and biodiversity goals. ECOLOGICAL ECONOMICS, 201. https://doi.org/10.1016/j.ecolecon.2022.107562
Zuberi, M., Chambers, J., & Patel, M. (2021). Techno-economic comparison of technology options for deep decarbonization and electrification of residential heating. ENERGY EFFICIENCY, 14(7). https://doi.org/10.1007/s12053-021-09984-7
Zuberi, M., Narula, K., Klinke, S., Chambers, J., Streicher, K., & Patel, M. (2021). Potential and costs of decentralized heat pumps and thermal networks in Swiss residential areas. INTERNATIONAL JOURNAL OF ENERGY RESEARCH, 45(10), 15245–15264. https://doi.org/10.1002/er.6801
Zulu, S., Zulu, E., Chabala, M., & Chunda, N. (2023). Drivers and barriers to sustainability practices in the Zambian Construction Industry. INTERNATIONAL JOURNAL OF CONSTRUCTION MANAGEMENT, 23(12), 2116–2125. https://doi.org/10.1080/15623599.2022.2045425
Zwickl-Bernhard, S., Auer, H., & Golab, A. (2022). Equitable decarbonization of heat supply in residential multi-apartment rental buildings: Optimal subsidy allocation between the property owner and tenants. ENERGY AND BUILDINGS, 262. https://doi.org/10.1016/j.enbuild.2022.112013
Political Testimony Corpus
Title	Published date	Publication location	Publication	Publication type	Section	Word count	Countries	Byline	Agg-copyright	Cite	Company	Headline	Hlead	Publication	Publication type	Title	Published date	Publication location	Publication	Publication type	Section	Word count	Countries	Byline	Agg-copyright	Cite	Company	Headline	Hlead	Publication	Publication type	Title	Published date	Publication location	Publication	Publication type	Section	Word count	Countries	Byline	Agg-copyright	Cite	Company	Headline	Hlead	Publication	Publication type	Title	Published date
House Transportation and Infrastructure Subcommittee on Economic Development, Public Buildings, and Emergency Management Holds Hearing on Federal Protective Service Effectiveness	July 23, 2024 Tuesday	International	CQ Transcriptions	News								House Transportation and Infrastructure Subcommittee on Economic Development, Public Buildings, and Emergency Management Holds Hearing on Federal Protective Service Effectiveness	House Transportation and Infrastructure Subcommittee on Economic Development, Public Buildings, and Emergency Management Holds Hearing on Federal Protective Service Effectiveness	CQ Transcriptions		House Transportation and Infrastructure Subcommittee on Economic Development, Public Buildings, and Emergency Management Holds Hearing on Federal Protective Service Effectiveness	July 23, 2024 Tuesday	International	CQ Transcriptions	News								House Transportation and Infrastructure Subcommittee on Economic Development, Public Buildings, and Emergency Management Holds Hearing on Federal Protective Service Effectiveness	House Transportation and Infrastructure Subcommittee on Economic Development, Public Buildings, and Emergency Management Holds Hearing on Federal Protective Service Effectiveness	CQ Transcriptions		House Transportation and Infrastructure Subcommittee on Economic Development, Public Buildings, and Emergency Management Holds Hearing on Federal Protective Service Effectiveness	July 23, 2024 Tuesday	International	CQ Transcriptions	News								House Transportation and Infrastructure Subcommittee on Economic Development, Public Buildings, and Emergency Management Holds Hearing on Federal Protective Service Effectiveness	House Transportation and Infrastructure Subcommittee on Economic Development, Public Buildings, and Emergency Management Holds Hearing on Federal Protective Service Effectiveness	CQ Transcriptions		House Transportation and Infrastructure Subcommittee on Economic Development, Public Buildings, and Emergency Management Holds Hearing on Federal Protective Service Effectiveness	July 23, 2024 Tuesday
House Agriculture Subcommittee on Livestock and Foreign Agriculture Holds Hearing on Beef Supply	July 28, 2021 Wednesday	International	CQ Transcriptions	News								House Agriculture Subcommittee on Livestock and Foreign Agriculture Holds Hearing on Beef Supply	House Agriculture Subcommittee on Livestock and Foreign Agriculture Holds Hearing on Beef Supply	CQ Transcriptions		House Agriculture Subcommittee on Livestock and Foreign Agriculture Holds Hearing on Beef Supply	July 28, 2021 Wednesday	International	CQ Transcriptions	News								House Agriculture Subcommittee on Livestock and Foreign Agriculture Holds Hearing on Beef Supply	House Agriculture Subcommittee on Livestock and Foreign Agriculture Holds Hearing on Beef Supply	CQ Transcriptions		House Agriculture Subcommittee on Livestock and Foreign Agriculture Holds Hearing on Beef Supply	July 28, 2021 Wednesday	International	CQ Transcriptions	News								House Agriculture Subcommittee on Livestock and Foreign Agriculture Holds Hearing on Beef Supply	House Agriculture Subcommittee on Livestock and Foreign Agriculture Holds Hearing on Beef Supply	CQ Transcriptions		House Agriculture Subcommittee on Livestock and Foreign Agriculture Holds Hearing on Beef Supply	July 28, 2021 Wednesday
House Natural Resources Subcommittee on Indigenous Peoples of the United States Holds Hearing on Federal Funding Shortfalls in Indian Country	November 19, 2019 Tuesday	International	CQ Transcriptions	News								House Natural Resources Subcommittee on Indigenous Peoples of the United States Holds Hearing on Federal Funding Shortfalls in Indian Country	House Natural Resources Subcommittee on Indigenous Peoples of the United States Holds Hearing on Federal Funding Shortfalls in Indian Country	CQ Transcriptions		House Natural Resources Subcommittee on Indigenous Peoples of the United States Holds Hearing on Federal Funding Shortfalls in Indian Country	November 19, 2019 Tuesday	International	CQ Transcriptions	News								House Natural Resources Subcommittee on Indigenous Peoples of the United States Holds Hearing on Federal Funding Shortfalls in Indian Country	House Natural Resources Subcommittee on Indigenous Peoples of the United States Holds Hearing on Federal Funding Shortfalls in Indian Country	CQ Transcriptions		House Natural Resources Subcommittee on Indigenous Peoples of the United States Holds Hearing on Federal Funding Shortfalls in Indian Country	November 19, 2019 Tuesday	International	CQ Transcriptions	News								House Natural Resources Subcommittee on Indigenous Peoples of the United States Holds Hearing on Federal Funding Shortfalls in Indian Country	House Natural Resources Subcommittee on Indigenous Peoples of the United States Holds Hearing on Federal Funding Shortfalls in Indian Country	CQ Transcriptions		House Natural Resources Subcommittee on Indigenous Peoples of the United States Holds Hearing on Federal Funding Shortfalls in Indian Country	November 19, 2019 Tuesday
Senate Homeland Security and Governmental Affairs Committee Holds Hearing on Pending Nominations	July 25, 2024 Thursday	International	CQ Transcriptions	News								Senate Homeland Security and Governmental Affairs Committee Holds Hearing on Pending Nominations	Senate Homeland Security and Governmental Affairs Committee Holds Hearing on Pending Nominations	CQ Transcriptions		Senate Homeland Security and Governmental Affairs Committee Holds Hearing on Pending Nominations	July 25, 2024 Thursday	International	CQ Transcriptions	News								Senate Homeland Security and Governmental Affairs Committee Holds Hearing on Pending Nominations	Senate Homeland Security and Governmental Affairs Committee Holds Hearing on Pending Nominations	CQ Transcriptions		Senate Homeland Security and Governmental Affairs Committee Holds Hearing on Pending Nominations	July 25, 2024 Thursday	International	CQ Transcriptions	News								Senate Homeland Security and Governmental Affairs Committee Holds Hearing on Pending Nominations	Senate Homeland Security and Governmental Affairs Committee Holds Hearing on Pending Nominations	CQ Transcriptions		Senate Homeland Security and Governmental Affairs Committee Holds Hearing on Pending Nominations	July 25, 2024 Thursday
House Financial Services Committee Holds Hearing on Monetary Policy and State of the Economy	July 14, 2021 Wednesday	International	CQ Transcriptions	News								House Financial Services Committee Holds Hearing on Monetary Policy and State of the Economy	House Financial Services Committee Holds Hearing on Monetary Policy and State of the Economy	CQ Transcriptions		House Financial Services Committee Holds Hearing on Monetary Policy and State of the Economy	July 14, 2021 Wednesday	International	CQ Transcriptions	News								House Financial Services Committee Holds Hearing on Monetary Policy and State of the Economy	House Financial Services Committee Holds Hearing on Monetary Policy and State of the Economy	CQ Transcriptions		House Financial Services Committee Holds Hearing on Monetary Policy and State of the Economy	July 14, 2021 Wednesday	International	CQ Transcriptions	News								House Financial Services Committee Holds Hearing on Monetary Policy and State of the Economy	House Financial Services Committee Holds Hearing on Monetary Policy and State of the Economy	CQ Transcriptions		House Financial Services Committee Holds Hearing on Monetary Policy and State of the Economy	July 14, 2021 Wednesday
House Financial Services Subcommittee on Housing, Community Development, and Insurance Holds Hearing on Freedmen in Native American Communities	July 27, 2021 Tuesday	International	CQ Transcriptions	News								House Financial Services Subcommittee on Housing, Community Development, and Insurance Holds Hearing on Freedmen in Native American Communities	House Financial Services Subcommittee on Housing, Community Development, and Insurance Holds Hearing on Freedmen in Native American Communities	CQ Transcriptions		House Financial Services Subcommittee on Housing, Community Development, and Insurance Holds Hearing on Freedmen in Native American Communities	July 27, 2021 Tuesday	International	CQ Transcriptions	News								House Financial Services Subcommittee on Housing, Community Development, and Insurance Holds Hearing on Freedmen in Native American Communities	House Financial Services Subcommittee on Housing, Community Development, and Insurance Holds Hearing on Freedmen in Native American Communities	CQ Transcriptions		House Financial Services Subcommittee on Housing, Community Development, and Insurance Holds Hearing on Freedmen in Native American Communities	July 27, 2021 Tuesday	International	CQ Transcriptions	News								House Financial Services Subcommittee on Housing, Community Development, and Insurance Holds Hearing on Freedmen in Native American Communities	House Financial Services Subcommittee on Housing, Community Development, and Insurance Holds Hearing on Freedmen in Native American Communities	CQ Transcriptions		House Financial Services Subcommittee on Housing, Community Development, and Insurance Holds Hearing on Freedmen in Native American Communities	July 27, 2021 Tuesday
House Financial Services Committee Holds Hearing on Affordable Housing Crisis and Gentrification	January 14, 2020 Tuesday	International	CQ Transcriptions	News								House Financial Services Committee Holds Hearing on Affordable Housing Crisis and Gentrification	House Financial Services Committee Holds Hearing on Affordable Housing Crisis and Gentrification	CQ Transcriptions		House Financial Services Committee Holds Hearing on Affordable Housing Crisis and Gentrification	January 14, 2020 Tuesday	International	CQ Transcriptions	News								House Financial Services Committee Holds Hearing on Affordable Housing Crisis and Gentrification	House Financial Services Committee Holds Hearing on Affordable Housing Crisis and Gentrification	CQ Transcriptions		House Financial Services Committee Holds Hearing on Affordable Housing Crisis and Gentrification	January 14, 2020 Tuesday	International	CQ Transcriptions	News								House Financial Services Committee Holds Hearing on Affordable Housing Crisis and Gentrification	House Financial Services Committee Holds Hearing on Affordable Housing Crisis and Gentrification	CQ Transcriptions		House Financial Services Committee Holds Hearing on Affordable Housing Crisis and Gentrification	January 14, 2020 Tuesday
Senate Banking, Housing and Urban Affairs Committee Holds Hearing on Pending Nominations	July 13, 2021 Tuesday	International	CQ Transcriptions	News								Senate Banking, Housing and Urban Affairs Committee Holds Hearing on Pending Nominations	Senate Banking, Housing and Urban Affairs Committee Holds Hearing on Pending Nominations	CQ Transcriptions		Senate Banking, Housing and Urban Affairs Committee Holds Hearing on Pending Nominations	July 13, 2021 Tuesday	International	CQ Transcriptions	News								Senate Banking, Housing and Urban Affairs Committee Holds Hearing on Pending Nominations	Senate Banking, Housing and Urban Affairs Committee Holds Hearing on Pending Nominations	CQ Transcriptions		Senate Banking, Housing and Urban Affairs Committee Holds Hearing on Pending Nominations	July 13, 2021 Tuesday	International	CQ Transcriptions	News								Senate Banking, Housing and Urban Affairs Committee Holds Hearing on Pending Nominations	Senate Banking, Housing and Urban Affairs Committee Holds Hearing on Pending Nominations	CQ Transcriptions		Senate Banking, Housing and Urban Affairs Committee Holds Hearing on Pending Nominations	July 13, 2021 Tuesday
House Transportation and Infrastructure Subcommittee on Highways and Transit Holds Hearing on Transportation's Regulatory Administration	July 24, 2024 Wednesday	International	CQ Transcriptions	News								House Transportation and Infrastructure Subcommittee on Highways and Transit Holds Hearing on Transportation's Regulatory Administration	House Transportation and Infrastructure Subcommittee on Highways and Transit Holds Hearing on Transportation's Regulatory Administration	CQ Transcriptions		House Transportation and Infrastructure Subcommittee on Highways and Transit Holds Hearing on Transportation's Regulatory Administration	July 24, 2024 Wednesday	International	CQ Transcriptions	News								House Transportation and Infrastructure Subcommittee on Highways and Transit Holds Hearing on Transportation's Regulatory Administration	House Transportation and Infrastructure Subcommittee on Highways and Transit Holds Hearing on Transportation's Regulatory Administration	CQ Transcriptions		House Transportation and Infrastructure Subcommittee on Highways and Transit Holds Hearing on Transportation's Regulatory Administration	July 24, 2024 Wednesday	International	CQ Transcriptions	News								House Transportation and Infrastructure Subcommittee on Highways and Transit Holds Hearing on Transportation's Regulatory Administration	House Transportation and Infrastructure Subcommittee on Highways and Transit Holds Hearing on Transportation's Regulatory Administration	CQ Transcriptions		House Transportation and Infrastructure Subcommittee on Highways and Transit Holds Hearing on Transportation's Regulatory Administration	July 24, 2024 Wednesday
House Appropriations Subcommittee on Military Construction, Veterans Affairs and Related Agencies Holds Hearing on the Fiscal Year 2025 Navy and Marine Corps Military Construction Budget Request	April 11, 2024 Thursday	International	CQ Transcriptions	News								House Appropriations Subcommittee on Military Construction, Veterans Affairs and Related Agencies Holds Hearing on the Fiscal Year 2025 Navy and Marine Corps Military Construction Budget Request	House Appropriations Subcommittee on Military Construction, Veterans Affairs and Related Agencies Holds Hearing on the Fiscal Year 2025 Navy and Marine Corps Military Construction Budget Request	CQ Transcriptions		House Appropriations Subcommittee on Military Construction, Veterans Affairs and Related Agencies Holds Hearing on the Fiscal Year 2025 Navy and Marine Corps Military Construction Budget Request	April 11, 2024 Thursday	International	CQ Transcriptions	News								House Appropriations Subcommittee on Military Construction, Veterans Affairs and Related Agencies Holds Hearing on the Fiscal Year 2025 Navy and Marine Corps Military Construction Budget Request	House Appropriations Subcommittee on Military Construction, Veterans Affairs and Related Agencies Holds Hearing on the Fiscal Year 2025 Navy and Marine Corps Military Construction Budget Request	CQ Transcriptions		House Appropriations Subcommittee on Military Construction, Veterans Affairs and Related Agencies Holds Hearing on the Fiscal Year 2025 Navy and Marine Corps Military Construction Budget Request	April 11, 2024 Thursday	International	CQ Transcriptions	News								House Appropriations Subcommittee on Military Construction, Veterans Affairs and Related Agencies Holds Hearing on the Fiscal Year 2025 Navy and Marine Corps Military Construction Budget Request	House Appropriations Subcommittee on Military Construction, Veterans Affairs and Related Agencies Holds Hearing on the Fiscal Year 2025 Navy and Marine Corps Military Construction Budget Request	CQ Transcriptions		House Appropriations Subcommittee on Military Construction, Veterans Affairs and Related Agencies Holds Hearing on the Fiscal Year 2025 Navy and Marine Corps Military Construction Budget Request	April 11, 2024 Thursday
House Transportation and Infrastructure Subcommittee on Coast Guard and Maritime Transportation Holds Hearing on Commercial and Passenger Vessel Safety	November 14, 2019 Thursday	International	CQ Transcriptions	News								House Transportation and Infrastructure Subcommittee on Coast Guard and Maritime Transportation Holds Hearing on Commercial and Passenger Vessel Safety	House Transportation and Infrastructure Subcommittee on Coast Guard and Maritime Transportation Holds Hearing on Commercial and Passenger Vessel Safety	CQ Transcriptions		House Transportation and Infrastructure Subcommittee on Coast Guard and Maritime Transportation Holds Hearing on Commercial and Passenger Vessel Safety	November 14, 2019 Thursday	International	CQ Transcriptions	News								House Transportation and Infrastructure Subcommittee on Coast Guard and Maritime Transportation Holds Hearing on Commercial and Passenger Vessel Safety	House Transportation and Infrastructure Subcommittee on Coast Guard and Maritime Transportation Holds Hearing on Commercial and Passenger Vessel Safety	CQ Transcriptions		House Transportation and Infrastructure Subcommittee on Coast Guard and Maritime Transportation Holds Hearing on Commercial and Passenger Vessel Safety	November 14, 2019 Thursday	International	CQ Transcriptions	News								House Transportation and Infrastructure Subcommittee on Coast Guard and Maritime Transportation Holds Hearing on Commercial and Passenger Vessel Safety	House Transportation and Infrastructure Subcommittee on Coast Guard and Maritime Transportation Holds Hearing on Commercial and Passenger Vessel Safety	CQ Transcriptions		House Transportation and Infrastructure Subcommittee on Coast Guard and Maritime Transportation Holds Hearing on Commercial and Passenger Vessel Safety	November 14, 2019 Thursday
House Appropriations Subcommittee on Homeland Security Holds Hearing on Fiscal Year 2023 Department of Homeland Security Budget	April 27, 2022 Wednesday	International	CQ Transcriptions	News								House Appropriations Subcommittee on Homeland Security Holds Hearing on Fiscal Year 2023 Department of Homeland Security Budget	House Appropriations Subcommittee on Homeland Security Holds Hearing on Fiscal Year 2023 Department of Homeland Security Budget	CQ Transcriptions		House Appropriations Subcommittee on Homeland Security Holds Hearing on Fiscal Year 2023 Department of Homeland Security Budget	April 27, 2022 Wednesday	International	CQ Transcriptions	News								House Appropriations Subcommittee on Homeland Security Holds Hearing on Fiscal Year 2023 Department of Homeland Security Budget	House Appropriations Subcommittee on Homeland Security Holds Hearing on Fiscal Year 2023 Department of Homeland Security Budget	CQ Transcriptions		House Appropriations Subcommittee on Homeland Security Holds Hearing on Fiscal Year 2023 Department of Homeland Security Budget	April 27, 2022 Wednesday	International	CQ Transcriptions	News								House Appropriations Subcommittee on Homeland Security Holds Hearing on Fiscal Year 2023 Department of Homeland Security Budget	House Appropriations Subcommittee on Homeland Security Holds Hearing on Fiscal Year 2023 Department of Homeland Security Budget	CQ Transcriptions		House Appropriations Subcommittee on Homeland Security Holds Hearing on Fiscal Year 2023 Department of Homeland Security Budget	April 27, 2022 Wednesday
Senate Environment and Public Works Committee Holds Hearing on USACE Water Infrastructure Implementation	January 12, 2022 Wednesday	International	CQ Transcriptions	News								Senate Environment and Public Works Committee Holds Hearing on USACE Water Infrastructure Implementation	Senate Environment and Public Works Committee Holds Hearing on USACE Water Infrastructure Implementation	CQ Transcriptions		Senate Environment and Public Works Committee Holds Hearing on USACE Water Infrastructure Implementation	January 12, 2022 Wednesday	International	CQ Transcriptions	News								Senate Environment and Public Works Committee Holds Hearing on USACE Water Infrastructure Implementation	Senate Environment and Public Works Committee Holds Hearing on USACE Water Infrastructure Implementation	CQ Transcriptions		Senate Environment and Public Works Committee Holds Hearing on USACE Water Infrastructure Implementation	January 12, 2022 Wednesday	International	CQ Transcriptions	News								Senate Environment and Public Works Committee Holds Hearing on USACE Water Infrastructure Implementation	Senate Environment and Public Works Committee Holds Hearing on USACE Water Infrastructure Implementation	CQ Transcriptions		Senate Environment and Public Works Committee Holds Hearing on USACE Water Infrastructure Implementation	January 12, 2022 Wednesday
House Appropriations Subcommittee on Homeland Security Holds Hearing on Fiscal Year 2024 Budget Request for the Department of Homeland Security	March 29, 2023 Wednesday	International	CQ Transcriptions	News								House Appropriations Subcommittee on Homeland Security Holds Hearing on Fiscal Year 2024 Budget Request for the Department of Homeland Security	House Appropriations Subcommittee on Homeland Security Holds Hearing on Fiscal Year 2024 Budget Request for the Department of Homeland Security	CQ Transcriptions		House Appropriations Subcommittee on Homeland Security Holds Hearing on Fiscal Year 2024 Budget Request for the Department of Homeland Security	March 29, 2023 Wednesday	International	CQ Transcriptions	News								House Appropriations Subcommittee on Homeland Security Holds Hearing on Fiscal Year 2024 Budget Request for the Department of Homeland Security	House Appropriations Subcommittee on Homeland Security Holds Hearing on Fiscal Year 2024 Budget Request for the Department of Homeland Security	CQ Transcriptions		House Appropriations Subcommittee on Homeland Security Holds Hearing on Fiscal Year 2024 Budget Request for the Department of Homeland Security	March 29, 2023 Wednesday	International	CQ Transcriptions	News								House Appropriations Subcommittee on Homeland Security Holds Hearing on Fiscal Year 2024 Budget Request for the Department of Homeland Security	House Appropriations Subcommittee on Homeland Security Holds Hearing on Fiscal Year 2024 Budget Request for the Department of Homeland Security	CQ Transcriptions		House Appropriations Subcommittee on Homeland Security Holds Hearing on Fiscal Year 2024 Budget Request for the Department of Homeland Security	March 29, 2023 Wednesday
House Appropriations Subcommittee on Commerce, Justice and Science Holds Hearing on Executive Office for Immigration Review	March 7, 2019 Thursday	International	CQ Transcriptions	News								House Appropriations Subcommittee on Commerce, Justice and Science Holds Hearing on Executive Office for Immigration Review	House Appropriations Subcommittee on Commerce, Justice and Science Holds Hearing on Executive Office for Immigration Review	CQ Transcriptions		House Appropriations Subcommittee on Commerce, Justice and Science Holds Hearing on Executive Office for Immigration Review	March 7, 2019 Thursday	International	CQ Transcriptions	News								House Appropriations Subcommittee on Commerce, Justice and Science Holds Hearing on Executive Office for Immigration Review	House Appropriations Subcommittee on Commerce, Justice and Science Holds Hearing on Executive Office for Immigration Review	CQ Transcriptions		House Appropriations Subcommittee on Commerce, Justice and Science Holds Hearing on Executive Office for Immigration Review	March 7, 2019 Thursday	International	CQ Transcriptions	News								House Appropriations Subcommittee on Commerce, Justice and Science Holds Hearing on Executive Office for Immigration Review	House Appropriations Subcommittee on Commerce, Justice and Science Holds Hearing on Executive Office for Immigration Review	CQ Transcriptions		House Appropriations Subcommittee on Commerce, Justice and Science Holds Hearing on Executive Office for Immigration Review	March 7, 2019 Thursday
House Armed Services Subcommittee on Strategic Forces Holds Hearing on the Fiscal Year 2025 Nuclear Forces and Atomic Energy Defense Budget Request	April 30, 2024 Tuesday	International	CQ Transcriptions	News								House Armed Services Subcommittee on Strategic Forces Holds Hearing on the Fiscal Year 2025 Nuclear Forces and Atomic Energy Defense Budget Request	House Armed Services Subcommittee on Strategic Forces Holds Hearing on the Fiscal Year 2025 Nuclear Forces and Atomic Energy Defense Budget Request	CQ Transcriptions		House Armed Services Subcommittee on Strategic Forces Holds Hearing on the Fiscal Year 2025 Nuclear Forces and Atomic Energy Defense Budget Request	April 30, 2024 Tuesday	International	CQ Transcriptions	News								House Armed Services Subcommittee on Strategic Forces Holds Hearing on the Fiscal Year 2025 Nuclear Forces and Atomic Energy Defense Budget Request	House Armed Services Subcommittee on Strategic Forces Holds Hearing on the Fiscal Year 2025 Nuclear Forces and Atomic Energy Defense Budget Request	CQ Transcriptions		House Armed Services Subcommittee on Strategic Forces Holds Hearing on the Fiscal Year 2025 Nuclear Forces and Atomic Energy Defense Budget Request	April 30, 2024 Tuesday	International	CQ Transcriptions	News								House Armed Services Subcommittee on Strategic Forces Holds Hearing on the Fiscal Year 2025 Nuclear Forces and Atomic Energy Defense Budget Request	House Armed Services Subcommittee on Strategic Forces Holds Hearing on the Fiscal Year 2025 Nuclear Forces and Atomic Energy Defense Budget Request	CQ Transcriptions		House Armed Services Subcommittee on Strategic Forces Holds Hearing on the Fiscal Year 2025 Nuclear Forces and Atomic Energy Defense Budget Request	April 30, 2024 Tuesday
House Appropriations Subcommittee on Transportation, and Housing and Urban Development and Related Agencies Holds Hearing on Fiscal Year 2025 Department of Housing and Urban Development Budget Request	May 1, 2024 Wednesday	International	CQ Transcriptions	News								House Appropriations Subcommittee on Transportation, and Housing and Urban Development and Related Agencies Holds Hearing on Fiscal Year 2025 Department of Housing and Urban Development Budget Request	House Appropriations Subcommittee on Transportation, and Housing and Urban Development and Related Agencies Holds Hearing on Fiscal Year 2025 Department of Housing and Urban Development Budget Request	CQ Transcriptions		House Appropriations Subcommittee on Transportation, and Housing and Urban Development and Related Agencies Holds Hearing on Fiscal Year 2025 Department of Housing and Urban Development Budget Request	May 1, 2024 Wednesday	International	CQ Transcriptions	News								House Appropriations Subcommittee on Transportation, and Housing and Urban Development and Related Agencies Holds Hearing on Fiscal Year 2025 Department of Housing and Urban Development Budget Request	House Appropriations Subcommittee on Transportation, and Housing and Urban Development and Related Agencies Holds Hearing on Fiscal Year 2025 Department of Housing and Urban Development Budget Request	CQ Transcriptions		House Appropriations Subcommittee on Transportation, and Housing and Urban Development and Related Agencies Holds Hearing on Fiscal Year 2025 Department of Housing and Urban Development Budget Request	May 1, 2024 Wednesday	International	CQ Transcriptions	News								House Appropriations Subcommittee on Transportation, and Housing and Urban Development and Related Agencies Holds Hearing on Fiscal Year 2025 Department of Housing and Urban Development Budget Request	House Appropriations Subcommittee on Transportation, and Housing and Urban Development and Related Agencies Holds Hearing on Fiscal Year 2025 Department of Housing and Urban Development Budget Request	CQ Transcriptions		House Appropriations Subcommittee on Transportation, and Housing and Urban Development and Related Agencies Holds Hearing on Fiscal Year 2025 Department of Housing and Urban Development Budget Request	May 1, 2024 Wednesday
House Transportation and Infrastructure Subcommittee on Coast Guard and Maritime Transportation Holds Hearing on Fiscal Year 2023 Coast Guard and Maritime Transportation Programs Budget	April 27, 2022 Wednesday	International	CQ Transcriptions	News								House Transportation and Infrastructure Subcommittee on Coast Guard and Maritime Transportation Holds Hearing on Fiscal Year 2023 Coast Guard and Maritime Transportation Programs Budget	House Transportation and Infrastructure Subcommittee on Coast Guard and Maritime Transportation Holds Hearing on Fiscal Year 2023 Coast Guard and Maritime Transportation Programs Budget	CQ Transcriptions		House Transportation and Infrastructure Subcommittee on Coast Guard and Maritime Transportation Holds Hearing on Fiscal Year 2023 Coast Guard and Maritime Transportation Programs Budget	April 27, 2022 Wednesday	International	CQ Transcriptions	News								House Transportation and Infrastructure Subcommittee on Coast Guard and Maritime Transportation Holds Hearing on Fiscal Year 2023 Coast Guard and Maritime Transportation Programs Budget	House Transportation and Infrastructure Subcommittee on Coast Guard and Maritime Transportation Holds Hearing on Fiscal Year 2023 Coast Guard and Maritime Transportation Programs Budget	CQ Transcriptions		House Transportation and Infrastructure Subcommittee on Coast Guard and Maritime Transportation Holds Hearing on Fiscal Year 2023 Coast Guard and Maritime Transportation Programs Budget	April 27, 2022 Wednesday	International	CQ Transcriptions	News								House Transportation and Infrastructure Subcommittee on Coast Guard and Maritime Transportation Holds Hearing on Fiscal Year 2023 Coast Guard and Maritime Transportation Programs Budget	House Transportation and Infrastructure Subcommittee on Coast Guard and Maritime Transportation Holds Hearing on Fiscal Year 2023 Coast Guard and Maritime Transportation Programs Budget	CQ Transcriptions		House Transportation and Infrastructure Subcommittee on Coast Guard and Maritime Transportation Holds Hearing on Fiscal Year 2023 Coast Guard and Maritime Transportation Programs Budget	April 27, 2022 Wednesday
House Small Business Committee Holds Hearing on SBA Small Business Size Standards	February 6, 2024 Tuesday	International	CQ Transcriptions	News								House Small Business Committee Holds Hearing on SBA Small Business Size Standards	House Small Business Committee Holds Hearing on SBA Small Business Size Standards	CQ Transcriptions		House Small Business Committee Holds Hearing on SBA Small Business Size Standards	February 6, 2024 Tuesday	International	CQ Transcriptions	News								House Small Business Committee Holds Hearing on SBA Small Business Size Standards	House Small Business Committee Holds Hearing on SBA Small Business Size Standards	CQ Transcriptions		House Small Business Committee Holds Hearing on SBA Small Business Size Standards	February 6, 2024 Tuesday	International	CQ Transcriptions	News								House Small Business Committee Holds Hearing on SBA Small Business Size Standards	House Small Business Committee Holds Hearing on SBA Small Business Size Standards	CQ Transcriptions		House Small Business Committee Holds Hearing on SBA Small Business Size Standards	February 6, 2024 Tuesday
House Veterans' Affairs Committee Holds Hearing on VA Infrastructure	May 27, 2021 Thursday	International	CQ Transcriptions	News								House Veterans' Affairs Committee Holds Hearing on VA Infrastructure	House Veterans' Affairs Committee Holds Hearing on VA Infrastructure	CQ Transcriptions		House Veterans' Affairs Committee Holds Hearing on VA Infrastructure	May 27, 2021 Thursday	International	CQ Transcriptions	News								House Veterans' Affairs Committee Holds Hearing on VA Infrastructure	House Veterans' Affairs Committee Holds Hearing on VA Infrastructure	CQ Transcriptions		House Veterans' Affairs Committee Holds Hearing on VA Infrastructure	May 27, 2021 Thursday	International	CQ Transcriptions	News								House Veterans' Affairs Committee Holds Hearing on VA Infrastructure	House Veterans' Affairs Committee Holds Hearing on VA Infrastructure	CQ Transcriptions		House Veterans' Affairs Committee Holds Hearing on VA Infrastructure	May 27, 2021 Thursday
Senate Foreign Relations Subcommittee on State Department and USAID Management, International Operations and Bilateral International Development Holds Hearing on USAID Localization	March 9, 2023 Thursday	International	CQ Transcriptions	News								Senate Foreign Relations Subcommittee on State Department and USAID Management, International Operations and Bilateral International Development Holds Hearing on USAID Localization	Senate Foreign Relations Subcommittee on State Department and USAID Management, International Operations and Bilateral International Development Holds Hearing on USAID Localization	CQ Transcriptions		Senate Foreign Relations Subcommittee on State Department and USAID Management, International Operations and Bilateral International Development Holds Hearing on USAID Localization	March 9, 2023 Thursday	International	CQ Transcriptions	News								Senate Foreign Relations Subcommittee on State Department and USAID Management, International Operations and Bilateral International Development Holds Hearing on USAID Localization	Senate Foreign Relations Subcommittee on State Department and USAID Management, International Operations and Bilateral International Development Holds Hearing on USAID Localization	CQ Transcriptions		Senate Foreign Relations Subcommittee on State Department and USAID Management, International Operations and Bilateral International Development Holds Hearing on USAID Localization	March 9, 2023 Thursday	International	CQ Transcriptions	News								Senate Foreign Relations Subcommittee on State Department and USAID Management, International Operations and Bilateral International Development Holds Hearing on USAID Localization	Senate Foreign Relations Subcommittee on State Department and USAID Management, International Operations and Bilateral International Development Holds Hearing on USAID Localization	CQ Transcriptions		Senate Foreign Relations Subcommittee on State Department and USAID Management, International Operations and Bilateral International Development Holds Hearing on USAID Localization	March 9, 2023 Thursday
Senate Environment and Public Works Committee Holds Hearing on Pending Legislation	September 7, 2022 Wednesday	International	CQ Transcriptions	News								Senate Environment and Public Works Committee Holds Hearing on Pending Legislation	Senate Environment and Public Works Committee Holds Hearing on Pending Legislation	CQ Transcriptions		Senate Environment and Public Works Committee Holds Hearing on Pending Legislation	September 7, 2022 Wednesday	International	CQ Transcriptions	News								Senate Environment and Public Works Committee Holds Hearing on Pending Legislation	Senate Environment and Public Works Committee Holds Hearing on Pending Legislation	CQ Transcriptions		Senate Environment and Public Works Committee Holds Hearing on Pending Legislation	September 7, 2022 Wednesday	International	CQ Transcriptions	News								Senate Environment and Public Works Committee Holds Hearing on Pending Legislation	Senate Environment and Public Works Committee Holds Hearing on Pending Legislation	CQ Transcriptions		Senate Environment and Public Works Committee Holds Hearing on Pending Legislation	September 7, 2022 Wednesday
House Transportation and Infrastructure Subcommittee on Coast Guard and Maritime Transportation Holds Hearing on Coast Guard Manpower Shortages	March 6, 2024 Wednesday	International	CQ Transcriptions	News								House Transportation and Infrastructure Subcommittee on Coast Guard and Maritime Transportation Holds Hearing on Coast Guard Manpower Shortages	House Transportation and Infrastructure Subcommittee on Coast Guard and Maritime Transportation Holds Hearing on Coast Guard Manpower Shortages	CQ Transcriptions		House Transportation and Infrastructure Subcommittee on Coast Guard and Maritime Transportation Holds Hearing on Coast Guard Manpower Shortages	March 6, 2024 Wednesday	International	CQ Transcriptions	News								House Transportation and Infrastructure Subcommittee on Coast Guard and Maritime Transportation Holds Hearing on Coast Guard Manpower Shortages	House Transportation and Infrastructure Subcommittee on Coast Guard and Maritime Transportation Holds Hearing on Coast Guard Manpower Shortages	CQ Transcriptions		House Transportation and Infrastructure Subcommittee on Coast Guard and Maritime Transportation Holds Hearing on Coast Guard Manpower Shortages	March 6, 2024 Wednesday	International	CQ Transcriptions	News								House Transportation and Infrastructure Subcommittee on Coast Guard and Maritime Transportation Holds Hearing on Coast Guard Manpower Shortages	House Transportation and Infrastructure Subcommittee on Coast Guard and Maritime Transportation Holds Hearing on Coast Guard Manpower Shortages	CQ Transcriptions		House Transportation and Infrastructure Subcommittee on Coast Guard and Maritime Transportation Holds Hearing on Coast Guard Manpower Shortages	March 6, 2024 Wednesday
House Energy and Commerce Subcommittee on Environment and Climate Change Holds Hearing on the New Coronavirus and Environmental Justice	June 9, 2020 Tuesday	International	CQ Transcriptions	News								House Energy and Commerce Subcommittee on Environment and Climate Change Holds Hearing on the New Coronavirus and Environmental Justice	House Energy and Commerce Subcommittee on Environment and Climate Change Holds Hearing on the New Coronavirus and Environmental Justice	CQ Transcriptions		House Energy and Commerce Subcommittee on Environment and Climate Change Holds Hearing on the New Coronavirus and Environmental Justice	June 9, 2020 Tuesday	International	CQ Transcriptions	News								House Energy and Commerce Subcommittee on Environment and Climate Change Holds Hearing on the New Coronavirus and Environmental Justice	House Energy and Commerce Subcommittee on Environment and Climate Change Holds Hearing on the New Coronavirus and Environmental Justice	CQ Transcriptions		House Energy and Commerce Subcommittee on Environment and Climate Change Holds Hearing on the New Coronavirus and Environmental Justice	June 9, 2020 Tuesday	International	CQ Transcriptions	News								House Energy and Commerce Subcommittee on Environment and Climate Change Holds Hearing on the New Coronavirus and Environmental Justice	House Energy and Commerce Subcommittee on Environment and Climate Change Holds Hearing on the New Coronavirus and Environmental Justice	CQ Transcriptions		House Energy and Commerce Subcommittee on Environment and Climate Change Holds Hearing on the New Coronavirus and Environmental Justice	June 9, 2020 Tuesday
House Education and Labor Committee Holds Hearing on Public Education and the New Coronavirus	June 15, 2020 Monday	International	CQ Transcriptions	News								House Education and Labor Committee Holds Hearing on Public Education and the New Coronavirus	House Education and Labor Committee Holds Hearing on Public Education and the New Coronavirus	CQ Transcriptions		House Education and Labor Committee Holds Hearing on Public Education and the New Coronavirus	June 15, 2020 Monday	International	CQ Transcriptions	News								House Education and Labor Committee Holds Hearing on Public Education and the New Coronavirus	House Education and Labor Committee Holds Hearing on Public Education and the New Coronavirus	CQ Transcriptions		House Education and Labor Committee Holds Hearing on Public Education and the New Coronavirus	June 15, 2020 Monday	International	CQ Transcriptions	News								House Education and Labor Committee Holds Hearing on Public Education and the New Coronavirus	House Education and Labor Committee Holds Hearing on Public Education and the New Coronavirus	CQ Transcriptions		House Education and Labor Committee Holds Hearing on Public Education and the New Coronavirus	June 15, 2020 Monday
Senate Armed Services Committee Holds Hearing on the Fiscal Year 2024 Department of Energy and National Nuclear Security Administration Atomic Energy Defense Activities Defense Authorization Request	April 26, 2023 Wednesday	International	CQ Transcriptions	News								Senate Armed Services Committee Holds Hearing on the Fiscal Year 2024 Department of Energy and National Nuclear Security Administration Atomic Energy Defense Activities Defense Authorization Request	Senate Armed Services Committee Holds Hearing on the Fiscal Year 2024 Department of Energy and National Nuclear Security Administration Atomic Energy Defense Activities Defense Authorization Request	CQ Transcriptions		Senate Armed Services Committee Holds Hearing on the Fiscal Year 2024 Department of Energy and National Nuclear Security Administration Atomic Energy Defense Activities Defense Authorization Request	April 26, 2023 Wednesday	International	CQ Transcriptions	News								Senate Armed Services Committee Holds Hearing on the Fiscal Year 2024 Department of Energy and National Nuclear Security Administration Atomic Energy Defense Activities Defense Authorization Request	Senate Armed Services Committee Holds Hearing on the Fiscal Year 2024 Department of Energy and National Nuclear Security Administration Atomic Energy Defense Activities Defense Authorization Request	CQ Transcriptions		Senate Armed Services Committee Holds Hearing on the Fiscal Year 2024 Department of Energy and National Nuclear Security Administration Atomic Energy Defense Activities Defense Authorization Request	April 26, 2023 Wednesday	International	CQ Transcriptions	News								Senate Armed Services Committee Holds Hearing on the Fiscal Year 2024 Department of Energy and National Nuclear Security Administration Atomic Energy Defense Activities Defense Authorization Request	Senate Armed Services Committee Holds Hearing on the Fiscal Year 2024 Department of Energy and National Nuclear Security Administration Atomic Energy Defense Activities Defense Authorization Request	CQ Transcriptions		Senate Armed Services Committee Holds Hearing on the Fiscal Year 2024 Department of Energy and National Nuclear Security Administration Atomic Energy Defense Activities Defense Authorization Request	April 26, 2023 Wednesday
House Science, Space and Technology Committee Holds Hearing on National Institute of Standards and Technology Priorities	May 22, 2024 Wednesday	International	CQ Transcriptions	News								House Science, Space and Technology Committee Holds Hearing on National Institute of Standards and Technology Priorities	House Science, Space and Technology Committee Holds Hearing on National Institute of Standards and Technology Priorities	CQ Transcriptions		House Science, Space and Technology Committee Holds Hearing on National Institute of Standards and Technology Priorities	May 22, 2024 Wednesday	International	CQ Transcriptions	News								House Science, Space and Technology Committee Holds Hearing on National Institute of Standards and Technology Priorities	House Science, Space and Technology Committee Holds Hearing on National Institute of Standards and Technology Priorities	CQ Transcriptions		House Science, Space and Technology Committee Holds Hearing on National Institute of Standards and Technology Priorities	May 22, 2024 Wednesday	International	CQ Transcriptions	News								House Science, Space and Technology Committee Holds Hearing on National Institute of Standards and Technology Priorities	House Science, Space and Technology Committee Holds Hearing on National Institute of Standards and Technology Priorities	CQ Transcriptions		House Science, Space and Technology Committee Holds Hearing on National Institute of Standards and Technology Priorities	May 22, 2024 Wednesday
House Appropriations Subcommittee on Energy and Water Development Holds Hearing on Members Priorities	April 9, 2019 Tuesday	International	CQ Transcriptions	News								House Appropriations Subcommittee on Energy and Water Development Holds Hearing on Members Priorities	House Appropriations Subcommittee on Energy and Water Development Holds Hearing on Members Priorities	CQ Transcriptions		House Appropriations Subcommittee on Energy and Water Development Holds Hearing on Members Priorities	April 9, 2019 Tuesday	International	CQ Transcriptions	News								House Appropriations Subcommittee on Energy and Water Development Holds Hearing on Members Priorities	House Appropriations Subcommittee on Energy and Water Development Holds Hearing on Members Priorities	CQ Transcriptions		House Appropriations Subcommittee on Energy and Water Development Holds Hearing on Members Priorities	April 9, 2019 Tuesday	International	CQ Transcriptions	News								House Appropriations Subcommittee on Energy and Water Development Holds Hearing on Members Priorities	House Appropriations Subcommittee on Energy and Water Development Holds Hearing on Members Priorities	CQ Transcriptions		House Appropriations Subcommittee on Energy and Water Development Holds Hearing on Members Priorities	April 9, 2019 Tuesday
House Appropriations Subcommittee on Energy and Water Development Holds Hearing on Members Priorities	April 9, 2019 Tuesday	International	CQ Transcriptions	News								House Appropriations Subcommittee on Energy and Water Development Holds Hearing on Members Priorities	House Appropriations Subcommittee on Energy and Water Development Holds Hearing on Members Priorities	CQ Transcriptions		House Appropriations Subcommittee on Energy and Water Development Holds Hearing on Members Priorities	April 9, 2019 Tuesday	International	CQ Transcriptions	News								House Appropriations Subcommittee on Energy and Water Development Holds Hearing on Members Priorities	House Appropriations Subcommittee on Energy and Water Development Holds Hearing on Members Priorities	CQ Transcriptions		House Appropriations Subcommittee on Energy and Water Development Holds Hearing on Members Priorities	April 9, 2019 Tuesday	International	CQ Transcriptions	News								House Appropriations Subcommittee on Energy and Water Development Holds Hearing on Members Priorities	House Appropriations Subcommittee on Energy and Water Development Holds Hearing on Members Priorities	CQ Transcriptions		House Appropriations Subcommittee on Energy and Water Development Holds Hearing on Members Priorities	April 9, 2019 Tuesday
House Education and the Workforce Committee Holds Hearing on Labor Department Policies and Priorities	May 1, 2024 Wednesday	International	CQ Transcriptions	News								House Education and the Workforce Committee Holds Hearing on Labor Department Policies and Priorities	House Education and the Workforce Committee Holds Hearing on Labor Department Policies and Priorities	CQ Transcriptions		House Education and the Workforce Committee Holds Hearing on Labor Department Policies and Priorities	May 1, 2024 Wednesday	International	CQ Transcriptions	News								House Education and the Workforce Committee Holds Hearing on Labor Department Policies and Priorities	House Education and the Workforce Committee Holds Hearing on Labor Department Policies and Priorities	CQ Transcriptions		House Education and the Workforce Committee Holds Hearing on Labor Department Policies and Priorities	May 1, 2024 Wednesday	International	CQ Transcriptions	News								House Education and the Workforce Committee Holds Hearing on Labor Department Policies and Priorities	House Education and the Workforce Committee Holds Hearing on Labor Department Policies and Priorities	CQ Transcriptions		House Education and the Workforce Committee Holds Hearing on Labor Department Policies and Priorities	May 1, 2024 Wednesday
U.S.-China Economic and Security Review Commission Holds Hearing on Issues Surrounding China	February 7, 2019 Thursday	International	CQ Transcriptions	News								U.S.-China Economic and Security Review Commission Holds Hearing on Issues Surrounding China	U.S.-China Economic and Security Review Commission Holds Hearing on Issues Surrounding China	CQ Transcriptions		U.S.-China Economic and Security Review Commission Holds Hearing on Issues Surrounding China	February 7, 2019 Thursday	International	CQ Transcriptions	News								U.S.-China Economic and Security Review Commission Holds Hearing on Issues Surrounding China	U.S.-China Economic and Security Review Commission Holds Hearing on Issues Surrounding China	CQ Transcriptions		U.S.-China Economic and Security Review Commission Holds Hearing on Issues Surrounding China	February 7, 2019 Thursday	International	CQ Transcriptions	News								U.S.-China Economic and Security Review Commission Holds Hearing on Issues Surrounding China	U.S.-China Economic and Security Review Commission Holds Hearing on Issues Surrounding China	CQ Transcriptions		U.S.-China Economic and Security Review Commission Holds Hearing on Issues Surrounding China	February 7, 2019 Thursday
Senate Environment and Public Works Subcommittee on Clean Air, Climate and Nuclear Safety Holds Hearing on Pending Nominations	April 6, 2022 Wednesday	International	CQ Transcriptions	News								Senate Environment and Public Works Subcommittee on Clean Air, Climate and Nuclear Safety Holds Hearing on Pending Nominations	Senate Environment and Public Works Subcommittee on Clean Air, Climate and Nuclear Safety Holds Hearing on Pending Nominations	CQ Transcriptions		Senate Environment and Public Works Subcommittee on Clean Air, Climate and Nuclear Safety Holds Hearing on Pending Nominations	April 6, 2022 Wednesday	International	CQ Transcriptions	News								Senate Environment and Public Works Subcommittee on Clean Air, Climate and Nuclear Safety Holds Hearing on Pending Nominations	Senate Environment and Public Works Subcommittee on Clean Air, Climate and Nuclear Safety Holds Hearing on Pending Nominations	CQ Transcriptions		Senate Environment and Public Works Subcommittee on Clean Air, Climate and Nuclear Safety Holds Hearing on Pending Nominations	April 6, 2022 Wednesday	International	CQ Transcriptions	News								Senate Environment and Public Works Subcommittee on Clean Air, Climate and Nuclear Safety Holds Hearing on Pending Nominations	Senate Environment and Public Works Subcommittee on Clean Air, Climate and Nuclear Safety Holds Hearing on Pending Nominations	CQ Transcriptions		Senate Environment and Public Works Subcommittee on Clean Air, Climate and Nuclear Safety Holds Hearing on Pending Nominations	April 6, 2022 Wednesday
Senate Appropriations Subcommittee on Homeland Security Holds Hearing on the Fiscal Year 2023 Homeland Security Budget Request	May 4, 2022 Wednesday	International	CQ Transcriptions	News								Senate Appropriations Subcommittee on Homeland Security Holds Hearing on the Fiscal Year 2023 Homeland Security Budget Request	Senate Appropriations Subcommittee on Homeland Security Holds Hearing on the Fiscal Year 2023 Homeland Security Budget Request	CQ Transcriptions		Senate Appropriations Subcommittee on Homeland Security Holds Hearing on the Fiscal Year 2023 Homeland Security Budget Request	May 4, 2022 Wednesday	International	CQ Transcriptions	News								Senate Appropriations Subcommittee on Homeland Security Holds Hearing on the Fiscal Year 2023 Homeland Security Budget Request	Senate Appropriations Subcommittee on Homeland Security Holds Hearing on the Fiscal Year 2023 Homeland Security Budget Request	CQ Transcriptions		Senate Appropriations Subcommittee on Homeland Security Holds Hearing on the Fiscal Year 2023 Homeland Security Budget Request	May 4, 2022 Wednesday	International	CQ Transcriptions	News								Senate Appropriations Subcommittee on Homeland Security Holds Hearing on the Fiscal Year 2023 Homeland Security Budget Request	Senate Appropriations Subcommittee on Homeland Security Holds Hearing on the Fiscal Year 2023 Homeland Security Budget Request	CQ Transcriptions		Senate Appropriations Subcommittee on Homeland Security Holds Hearing on the Fiscal Year 2023 Homeland Security Budget Request	May 4, 2022 Wednesday
House Homeland Security Committee Holds Hearing on the Way Forward on Homeland Security	March 17, 2021 Wednesday	International	CQ Transcriptions	News								House Homeland Security Committee Holds Hearing on the Way Forward on Homeland Security	House Homeland Security Committee Holds Hearing on the Way Forward on Homeland Security	CQ Transcriptions		House Homeland Security Committee Holds Hearing on the Way Forward on Homeland Security	March 17, 2021 Wednesday	International	CQ Transcriptions	News								House Homeland Security Committee Holds Hearing on the Way Forward on Homeland Security	House Homeland Security Committee Holds Hearing on the Way Forward on Homeland Security	CQ Transcriptions		House Homeland Security Committee Holds Hearing on the Way Forward on Homeland Security	March 17, 2021 Wednesday	International	CQ Transcriptions	News								House Homeland Security Committee Holds Hearing on the Way Forward on Homeland Security	House Homeland Security Committee Holds Hearing on the Way Forward on Homeland Security	CQ Transcriptions		House Homeland Security Committee Holds Hearing on the Way Forward on Homeland Security	March 17, 2021 Wednesday
House Ways and Means Committee Holds Hearing on Tax Code and Infrastructure Investment	May 19, 2021 Wednesday	International	CQ Transcriptions	News								House Ways and Means Committee Holds Hearing on Tax Code and Infrastructure Investment	House Ways and Means Committee Holds Hearing on Tax Code and Infrastructure Investment	CQ Transcriptions		House Ways and Means Committee Holds Hearing on Tax Code and Infrastructure Investment	May 19, 2021 Wednesday	International	CQ Transcriptions	News								House Ways and Means Committee Holds Hearing on Tax Code and Infrastructure Investment	House Ways and Means Committee Holds Hearing on Tax Code and Infrastructure Investment	CQ Transcriptions		House Ways and Means Committee Holds Hearing on Tax Code and Infrastructure Investment	May 19, 2021 Wednesday	International	CQ Transcriptions	News								House Ways and Means Committee Holds Hearing on Tax Code and Infrastructure Investment	House Ways and Means Committee Holds Hearing on Tax Code and Infrastructure Investment	CQ Transcriptions		House Ways and Means Committee Holds Hearing on Tax Code and Infrastructure Investment	May 19, 2021 Wednesday
Bipartisan Policy Center Holds Webinar on Voting	December 15, 2020 Tuesday	International	CQ Transcriptions	News								Bipartisan Policy Center Holds Webinar on Voting	Bipartisan Policy Center Holds Webinar on Voting	CQ Transcriptions		Bipartisan Policy Center Holds Webinar on Voting	December 15, 2020 Tuesday	International	CQ Transcriptions	News								Bipartisan Policy Center Holds Webinar on Voting	Bipartisan Policy Center Holds Webinar on Voting	CQ Transcriptions		Bipartisan Policy Center Holds Webinar on Voting	December 15, 2020 Tuesday	International	CQ Transcriptions	News								Bipartisan Policy Center Holds Webinar on Voting	Bipartisan Policy Center Holds Webinar on Voting	CQ Transcriptions		Bipartisan Policy Center Holds Webinar on Voting	December 15, 2020 Tuesday
Senate Banking, Housing and Urban Affairs Committee Holds Hearing on Investing in Rural Communities	April 20, 2021 Tuesday	International	CQ Transcriptions	News								Senate Banking, Housing and Urban Affairs Committee Holds Hearing on Investing in Rural Communities	Senate Banking, Housing and Urban Affairs Committee Holds Hearing on Investing in Rural Communities	CQ Transcriptions		Senate Banking, Housing and Urban Affairs Committee Holds Hearing on Investing in Rural Communities	April 20, 2021 Tuesday	International	CQ Transcriptions	News								Senate Banking, Housing and Urban Affairs Committee Holds Hearing on Investing in Rural Communities	Senate Banking, Housing and Urban Affairs Committee Holds Hearing on Investing in Rural Communities	CQ Transcriptions		Senate Banking, Housing and Urban Affairs Committee Holds Hearing on Investing in Rural Communities	April 20, 2021 Tuesday	International	CQ Transcriptions	News								Senate Banking, Housing and Urban Affairs Committee Holds Hearing on Investing in Rural Communities	Senate Banking, Housing and Urban Affairs Committee Holds Hearing on Investing in Rural Communities	CQ Transcriptions		Senate Banking, Housing and Urban Affairs Committee Holds Hearing on Investing in Rural Communities	April 20, 2021 Tuesday
House Transportation and Infrastructure Committee Holds Hearing on Department of Transportation's Policies and Programs	September 20, 2023 Wednesday	International	CQ Transcriptions	News								House Transportation and Infrastructure Committee Holds Hearing on Department of Transportation's Policies and Programs	House Transportation and Infrastructure Committee Holds Hearing on Department of Transportation's Policies and Programs	CQ Transcriptions		House Transportation and Infrastructure Committee Holds Hearing on Department of Transportation's Policies and Programs	September 20, 2023 Wednesday	International	CQ Transcriptions	News								House Transportation and Infrastructure Committee Holds Hearing on Department of Transportation's Policies and Programs	House Transportation and Infrastructure Committee Holds Hearing on Department of Transportation's Policies and Programs	CQ Transcriptions		House Transportation and Infrastructure Committee Holds Hearing on Department of Transportation's Policies and Programs	September 20, 2023 Wednesday	International	CQ Transcriptions	News								House Transportation and Infrastructure Committee Holds Hearing on Department of Transportation's Policies and Programs	House Transportation and Infrastructure Committee Holds Hearing on Department of Transportation's Policies and Programs	CQ Transcriptions		House Transportation and Infrastructure Committee Holds Hearing on Department of Transportation's Policies and Programs	September 20, 2023 Wednesday
House Education and Labor Committee Holds Hearing on Labor Department Policies and Priorities	June 14, 2022 Tuesday	International	CQ Transcriptions	News								House Education and Labor Committee Holds Hearing on Labor Department Policies and Priorities	House Education and Labor Committee Holds Hearing on Labor Department Policies and Priorities	CQ Transcriptions		House Education and Labor Committee Holds Hearing on Labor Department Policies and Priorities	June 14, 2022 Tuesday	International	CQ Transcriptions	News								House Education and Labor Committee Holds Hearing on Labor Department Policies and Priorities	House Education and Labor Committee Holds Hearing on Labor Department Policies and Priorities	CQ Transcriptions		House Education and Labor Committee Holds Hearing on Labor Department Policies and Priorities	June 14, 2022 Tuesday	International	CQ Transcriptions	News								House Education and Labor Committee Holds Hearing on Labor Department Policies and Priorities	House Education and Labor Committee Holds Hearing on Labor Department Policies and Priorities	CQ Transcriptions		House Education and Labor Committee Holds Hearing on Labor Department Policies and Priorities	June 14, 2022 Tuesday
President Joe Biden Delivers Remarks at Bipartisan Infrastructure Deal Signing Ceremony	November 15, 2021 Monday	International	CQ Transcriptions	News								President Joe Biden Delivers Remarks at Bipartisan Infrastructure Deal Signing Ceremony	President Joe Biden Delivers Remarks at Bipartisan Infrastructure Deal Signing Ceremony	CQ Transcriptions		President Joe Biden Delivers Remarks at Bipartisan Infrastructure Deal Signing Ceremony	November 15, 2021 Monday	International	CQ Transcriptions	News								President Joe Biden Delivers Remarks at Bipartisan Infrastructure Deal Signing Ceremony	President Joe Biden Delivers Remarks at Bipartisan Infrastructure Deal Signing Ceremony	CQ Transcriptions		President Joe Biden Delivers Remarks at Bipartisan Infrastructure Deal Signing Ceremony	November 15, 2021 Monday	International	CQ Transcriptions	News								President Joe Biden Delivers Remarks at Bipartisan Infrastructure Deal Signing Ceremony	President Joe Biden Delivers Remarks at Bipartisan Infrastructure Deal Signing Ceremony	CQ Transcriptions		President Joe Biden Delivers Remarks at Bipartisan Infrastructure Deal Signing Ceremony	November 15, 2021 Monday
Senate Rules and Administration Committee Holds Hearing on General Election Preparations	July 22, 2020 Wednesday	International	CQ Transcriptions	News								Senate Rules and Administration Committee Holds Hearing on General Election Preparations	Senate Rules and Administration Committee Holds Hearing on General Election Preparations	CQ Transcriptions		Senate Rules and Administration Committee Holds Hearing on General Election Preparations	July 22, 2020 Wednesday	International	CQ Transcriptions	News								Senate Rules and Administration Committee Holds Hearing on General Election Preparations	Senate Rules and Administration Committee Holds Hearing on General Election Preparations	CQ Transcriptions		Senate Rules and Administration Committee Holds Hearing on General Election Preparations	July 22, 2020 Wednesday	International	CQ Transcriptions	News								Senate Rules and Administration Committee Holds Hearing on General Election Preparations	Senate Rules and Administration Committee Holds Hearing on General Election Preparations	CQ Transcriptions		Senate Rules and Administration Committee Holds Hearing on General Election Preparations	July 22, 2020 Wednesday
House Armed Services Subcommittees on Readiness and Seapower and Projection Forces Hold Joint Hearing on Sealift and Mobility Requirements and the National Defense Strategy	March 11, 2020 Wednesday	International	CQ Transcriptions	News								House Armed Services Subcommittees on Readiness and Seapower and Projection Forces Hold Joint Hearing on Sealift and Mobility Requirements and the National Defense Strategy	House Armed Services Subcommittees on Readiness and Seapower and Projection Forces Hold Joint Hearing on Sealift and Mobility Requirements and the National Defense Strategy	CQ Transcriptions		House Armed Services Subcommittees on Readiness and Seapower and Projection Forces Hold Joint Hearing on Sealift and Mobility Requirements and the National Defense Strategy	March 11, 2020 Wednesday	International	CQ Transcriptions	News								House Armed Services Subcommittees on Readiness and Seapower and Projection Forces Hold Joint Hearing on Sealift and Mobility Requirements and the National Defense Strategy	House Armed Services Subcommittees on Readiness and Seapower and Projection Forces Hold Joint Hearing on Sealift and Mobility Requirements and the National Defense Strategy	CQ Transcriptions		House Armed Services Subcommittees on Readiness and Seapower and Projection Forces Hold Joint Hearing on Sealift and Mobility Requirements and the National Defense Strategy	March 11, 2020 Wednesday	International	CQ Transcriptions	News								House Armed Services Subcommittees on Readiness and Seapower and Projection Forces Hold Joint Hearing on Sealift and Mobility Requirements and the National Defense Strategy	House Armed Services Subcommittees on Readiness and Seapower and Projection Forces Hold Joint Hearing on Sealift and Mobility Requirements and the National Defense Strategy	CQ Transcriptions		House Armed Services Subcommittees on Readiness and Seapower and Projection Forces Hold Joint Hearing on Sealift and Mobility Requirements and the National Defense Strategy	March 11, 2020 Wednesday
House Judiciary Committee Holds Hearing on Homeland Security Oversight	April 28, 2022 Thursday	International	CQ Transcriptions	News								House Judiciary Committee Holds Hearing on Homeland Security Oversight	House Judiciary Committee Holds Hearing on Homeland Security Oversight	CQ Transcriptions		House Judiciary Committee Holds Hearing on Homeland Security Oversight	April 28, 2022 Thursday	International	CQ Transcriptions	News								House Judiciary Committee Holds Hearing on Homeland Security Oversight	House Judiciary Committee Holds Hearing on Homeland Security Oversight	CQ Transcriptions		House Judiciary Committee Holds Hearing on Homeland Security Oversight	April 28, 2022 Thursday	International	CQ Transcriptions	News								House Judiciary Committee Holds Hearing on Homeland Security Oversight	House Judiciary Committee Holds Hearing on Homeland Security Oversight	CQ Transcriptions		House Judiciary Committee Holds Hearing on Homeland Security Oversight	April 28, 2022 Thursday
Senate Foreign Relations Committee Holds Hearing on Pending Nominations	October 20, 2021 Wednesday	International	CQ Transcriptions	News								Senate Foreign Relations Committee Holds Hearing on Pending Nominations	Senate Foreign Relations Committee Holds Hearing on Pending Nominations	CQ Transcriptions		Senate Foreign Relations Committee Holds Hearing on Pending Nominations	October 20, 2021 Wednesday	International	CQ Transcriptions	News								Senate Foreign Relations Committee Holds Hearing on Pending Nominations	Senate Foreign Relations Committee Holds Hearing on Pending Nominations	CQ Transcriptions		Senate Foreign Relations Committee Holds Hearing on Pending Nominations	October 20, 2021 Wednesday	International	CQ Transcriptions	News								Senate Foreign Relations Committee Holds Hearing on Pending Nominations	Senate Foreign Relations Committee Holds Hearing on Pending Nominations	CQ Transcriptions		Senate Foreign Relations Committee Holds Hearing on Pending Nominations	October 20, 2021 Wednesday
House Financial Services Committee Holds Hearing on Housing Finance Policy	October 22, 2019 Tuesday	International	CQ Transcriptions	News								House Financial Services Committee Holds Hearing on Housing Finance Policy	House Financial Services Committee Holds Hearing on Housing Finance Policy	CQ Transcriptions		House Financial Services Committee Holds Hearing on Housing Finance Policy	October 22, 2019 Tuesday	International	CQ Transcriptions	News								House Financial Services Committee Holds Hearing on Housing Finance Policy	House Financial Services Committee Holds Hearing on Housing Finance Policy	CQ Transcriptions		House Financial Services Committee Holds Hearing on Housing Finance Policy	October 22, 2019 Tuesday	International	CQ Transcriptions	News								House Financial Services Committee Holds Hearing on Housing Finance Policy	House Financial Services Committee Holds Hearing on Housing Finance Policy	CQ Transcriptions		House Financial Services Committee Holds Hearing on Housing Finance Policy	October 22, 2019 Tuesday
Senate Health, Education, Labor and Pensions Committee Holds Hearing on the Nomination of Julie Su to be Deputy Labor Secretary	March 16, 2021 Tuesday	International	CQ Transcriptions	News								Senate Health, Education, Labor and Pensions Committee Holds Hearing on the Nomination of Julie Su to be Deputy Labor Secretary	Senate Health, Education, Labor and Pensions Committee Holds Hearing on the Nomination of Julie Su to be Deputy Labor Secretary	CQ Transcriptions		Senate Health, Education, Labor and Pensions Committee Holds Hearing on the Nomination of Julie Su to be Deputy Labor Secretary	March 16, 2021 Tuesday	International	CQ Transcriptions	News								Senate Health, Education, Labor and Pensions Committee Holds Hearing on the Nomination of Julie Su to be Deputy Labor Secretary	Senate Health, Education, Labor and Pensions Committee Holds Hearing on the Nomination of Julie Su to be Deputy Labor Secretary	CQ Transcriptions		Senate Health, Education, Labor and Pensions Committee Holds Hearing on the Nomination of Julie Su to be Deputy Labor Secretary	March 16, 2021 Tuesday	International	CQ Transcriptions	News								Senate Health, Education, Labor and Pensions Committee Holds Hearing on the Nomination of Julie Su to be Deputy Labor Secretary	Senate Health, Education, Labor and Pensions Committee Holds Hearing on the Nomination of Julie Su to be Deputy Labor Secretary	CQ Transcriptions		Senate Health, Education, Labor and Pensions Committee Holds Hearing on the Nomination of Julie Su to be Deputy Labor Secretary	March 16, 2021 Tuesday
House Judiciary Subcommittee on Antitrust, Commercial and Administrative Law Holds Hearing on Online Platforms and Market Power	July 16, 2019 Tuesday	International	CQ Transcriptions	News								House Judiciary Subcommittee on Antitrust, Commercial and Administrative Law Holds Hearing on Online Platforms and Market Power	House Judiciary Subcommittee on Antitrust, Commercial and Administrative Law Holds Hearing on Online Platforms and Market Power	CQ Transcriptions		House Judiciary Subcommittee on Antitrust, Commercial and Administrative Law Holds Hearing on Online Platforms and Market Power	July 16, 2019 Tuesday	International	CQ Transcriptions	News								House Judiciary Subcommittee on Antitrust, Commercial and Administrative Law Holds Hearing on Online Platforms and Market Power	House Judiciary Subcommittee on Antitrust, Commercial and Administrative Law Holds Hearing on Online Platforms and Market Power	CQ Transcriptions		House Judiciary Subcommittee on Antitrust, Commercial and Administrative Law Holds Hearing on Online Platforms and Market Power	July 16, 2019 Tuesday	International	CQ Transcriptions	News								House Judiciary Subcommittee on Antitrust, Commercial and Administrative Law Holds Hearing on Online Platforms and Market Power	House Judiciary Subcommittee on Antitrust, Commercial and Administrative Law Holds Hearing on Online Platforms and Market Power	CQ Transcriptions		House Judiciary Subcommittee on Antitrust, Commercial and Administrative Law Holds Hearing on Online Platforms and Market Power	July 16, 2019 Tuesday
House Foreign Affairs Subcommittee on Europe, Eurasia, Energy and the Environment Holds Hearing on U.S.-Europe Alliance	March 26, 2019 Tuesday	International	CQ Transcriptions	News								House Foreign Affairs Subcommittee on Europe, Eurasia, Energy and the Environment Holds Hearing on U.S.-Europe Alliance	House Foreign Affairs Subcommittee on Europe, Eurasia, Energy and the Environment Holds Hearing on U.S.-Europe Alliance	CQ Transcriptions		House Foreign Affairs Subcommittee on Europe, Eurasia, Energy and the Environment Holds Hearing on U.S.-Europe Alliance	March 26, 2019 Tuesday	International	CQ Transcriptions	News								House Foreign Affairs Subcommittee on Europe, Eurasia, Energy and the Environment Holds Hearing on U.S.-Europe Alliance	House Foreign Affairs Subcommittee on Europe, Eurasia, Energy and the Environment Holds Hearing on U.S.-Europe Alliance	CQ Transcriptions		House Foreign Affairs Subcommittee on Europe, Eurasia, Energy and the Environment Holds Hearing on U.S.-Europe Alliance	March 26, 2019 Tuesday	International	CQ Transcriptions	News								House Foreign Affairs Subcommittee on Europe, Eurasia, Energy and the Environment Holds Hearing on U.S.-Europe Alliance	House Foreign Affairs Subcommittee on Europe, Eurasia, Energy and the Environment Holds Hearing on U.S.-Europe Alliance	CQ Transcriptions		House Foreign Affairs Subcommittee on Europe, Eurasia, Energy and the Environment Holds Hearing on U.S.-Europe Alliance	March 26, 2019 Tuesday
House Armed Services Committee Holds Hearing on Fiscal Year 2025 Department of the Army Budget Request	April 16, 2024 Tuesday	International	CQ Transcriptions	News								House Armed Services Committee Holds Hearing on Fiscal Year 2025 Department of the Army Budget Request	House Armed Services Committee Holds Hearing on Fiscal Year 2025 Department of the Army Budget Request	CQ Transcriptions		House Armed Services Committee Holds Hearing on Fiscal Year 2025 Department of the Army Budget Request	April 16, 2024 Tuesday	International	CQ Transcriptions	News								House Armed Services Committee Holds Hearing on Fiscal Year 2025 Department of the Army Budget Request	House Armed Services Committee Holds Hearing on Fiscal Year 2025 Department of the Army Budget Request	CQ Transcriptions		House Armed Services Committee Holds Hearing on Fiscal Year 2025 Department of the Army Budget Request	April 16, 2024 Tuesday	International	CQ Transcriptions	News								House Armed Services Committee Holds Hearing on Fiscal Year 2025 Department of the Army Budget Request	House Armed Services Committee Holds Hearing on Fiscal Year 2025 Department of the Army Budget Request	CQ Transcriptions		House Armed Services Committee Holds Hearing on Fiscal Year 2025 Department of the Army Budget Request	April 16, 2024 Tuesday
Senate Homeland Security and Governmental Affairs Committee Holds Hearing on the Nomination of Alejandro Mayorkas to be Homeland Security Secretary	January 19, 2021 Tuesday	International	CQ Transcriptions	News								Senate Homeland Security and Governmental Affairs Committee Holds Hearing on the Nomination of Alejandro Mayorkas to be Homeland Security Secretary	Senate Homeland Security and Governmental Affairs Committee Holds Hearing on the Nomination of Alejandro Mayorkas to be Homeland Security Secretary	CQ Transcriptions		Senate Homeland Security and Governmental Affairs Committee Holds Hearing on the Nomination of Alejandro Mayorkas to be Homeland Security Secretary	January 19, 2021 Tuesday	International	CQ Transcriptions	News								Senate Homeland Security and Governmental Affairs Committee Holds Hearing on the Nomination of Alejandro Mayorkas to be Homeland Security Secretary	Senate Homeland Security and Governmental Affairs Committee Holds Hearing on the Nomination of Alejandro Mayorkas to be Homeland Security Secretary	CQ Transcriptions		Senate Homeland Security and Governmental Affairs Committee Holds Hearing on the Nomination of Alejandro Mayorkas to be Homeland Security Secretary	January 19, 2021 Tuesday	International	CQ Transcriptions	News								Senate Homeland Security and Governmental Affairs Committee Holds Hearing on the Nomination of Alejandro Mayorkas to be Homeland Security Secretary	Senate Homeland Security and Governmental Affairs Committee Holds Hearing on the Nomination of Alejandro Mayorkas to be Homeland Security Secretary	CQ Transcriptions		Senate Homeland Security and Governmental Affairs Committee Holds Hearing on the Nomination of Alejandro Mayorkas to be Homeland Security Secretary	January 19, 2021 Tuesday
Senate Armed Services Subcommittee on Emerging Threats and Capabilities Holds Hearing on Defense Innovation	April 6, 2022 Wednesday	International	CQ Transcriptions	News								Senate Armed Services Subcommittee on Emerging Threats and Capabilities Holds Hearing on Defense Innovation	Senate Armed Services Subcommittee on Emerging Threats and Capabilities Holds Hearing on Defense Innovation	CQ Transcriptions		Senate Armed Services Subcommittee on Emerging Threats and Capabilities Holds Hearing on Defense Innovation	April 6, 2022 Wednesday	International	CQ Transcriptions	News								Senate Armed Services Subcommittee on Emerging Threats and Capabilities Holds Hearing on Defense Innovation	Senate Armed Services Subcommittee on Emerging Threats and Capabilities Holds Hearing on Defense Innovation	CQ Transcriptions		Senate Armed Services Subcommittee on Emerging Threats and Capabilities Holds Hearing on Defense Innovation	April 6, 2022 Wednesday	International	CQ Transcriptions	News								Senate Armed Services Subcommittee on Emerging Threats and Capabilities Holds Hearing on Defense Innovation	Senate Armed Services Subcommittee on Emerging Threats and Capabilities Holds Hearing on Defense Innovation	CQ Transcriptions		Senate Armed Services Subcommittee on Emerging Threats and Capabilities Holds Hearing on Defense Innovation	April 6, 2022 Wednesday
CNN "STATE OF THE UNION"	July 30, 2023 Sunday	International	CQ Transcriptions	News								CNN "STATE OF THE UNION"	CNN "STATE OF THE UNION"	CQ Transcriptions		CNN "STATE OF THE UNION"	July 30, 2023 Sunday	International	CQ Transcriptions	News								CNN "STATE OF THE UNION"	CNN "STATE OF THE UNION"	CQ Transcriptions		CNN "STATE OF THE UNION"	July 30, 2023 Sunday	International	CQ Transcriptions	News								CNN "STATE OF THE UNION"	CNN "STATE OF THE UNION"	CQ Transcriptions		CNN "STATE OF THE UNION"	July 30, 2023 Sunday
Middle East Policy Council Holds Briefing on Future of U.S. Engagement in the Middle East	April 12, 2019 Friday	International	CQ Transcriptions	News								Middle East Policy Council Holds Briefing on Future of U.S. Engagement in the Middle East	Middle East Policy Council Holds Briefing on Future of U.S. Engagement in the Middle East	CQ Transcriptions		Middle East Policy Council Holds Briefing on Future of U.S. Engagement in the Middle East	April 12, 2019 Friday	International	CQ Transcriptions	News								Middle East Policy Council Holds Briefing on Future of U.S. Engagement in the Middle East	Middle East Policy Council Holds Briefing on Future of U.S. Engagement in the Middle East	CQ Transcriptions		Middle East Policy Council Holds Briefing on Future of U.S. Engagement in the Middle East	April 12, 2019 Friday	International	CQ Transcriptions	News								Middle East Policy Council Holds Briefing on Future of U.S. Engagement in the Middle East	Middle East Policy Council Holds Briefing on Future of U.S. Engagement in the Middle East	CQ Transcriptions		Middle East Policy Council Holds Briefing on Future of U.S. Engagement in the Middle East	April 12, 2019 Friday
American Constitution Society Holds News Teleconference on Institutional Racism and the Legal System	June 5, 2020 Friday	International	CQ Transcriptions	News								American Constitution Society Holds News Teleconference on Institutional Racism and the Legal System	American Constitution Society Holds News Teleconference on Institutional Racism and the Legal System	CQ Transcriptions		American Constitution Society Holds News Teleconference on Institutional Racism and the Legal System	June 5, 2020 Friday	International	CQ Transcriptions	News								American Constitution Society Holds News Teleconference on Institutional Racism and the Legal System	American Constitution Society Holds News Teleconference on Institutional Racism and the Legal System	CQ Transcriptions		American Constitution Society Holds News Teleconference on Institutional Racism and the Legal System	June 5, 2020 Friday	International	CQ Transcriptions	News								American Constitution Society Holds News Teleconference on Institutional Racism and the Legal System	American Constitution Society Holds News Teleconference on Institutional Racism and the Legal System	CQ Transcriptions		American Constitution Society Holds News Teleconference on Institutional Racism and the Legal System	June 5, 2020 Friday
House Oversight And Reform Committee Holds Roundtable on Environmental Justice	July 21, 2021 Wednesday	International	CQ Transcriptions	News								House Oversight And Reform Committee Holds Roundtable on Environmental Justice	House Oversight And Reform Committee Holds Roundtable on Environmental Justice	CQ Transcriptions		House Oversight And Reform Committee Holds Roundtable on Environmental Justice	July 21, 2021 Wednesday	International	CQ Transcriptions	News								House Oversight And Reform Committee Holds Roundtable on Environmental Justice	House Oversight And Reform Committee Holds Roundtable on Environmental Justice	CQ Transcriptions		House Oversight And Reform Committee Holds Roundtable on Environmental Justice	July 21, 2021 Wednesday	International	CQ Transcriptions	News								House Oversight And Reform Committee Holds Roundtable on Environmental Justice	House Oversight And Reform Committee Holds Roundtable on Environmental Justice	CQ Transcriptions		House Oversight And Reform Committee Holds Roundtable on Environmental Justice	July 21, 2021 Wednesday
Senate Finance Committee Holds Hearing on the Tax Code and Domestic Manufacturing	March 16, 2021 Tuesday	International	CQ Transcriptions	News								Senate Finance Committee Holds Hearing on the Tax Code and Domestic Manufacturing	Senate Finance Committee Holds Hearing on the Tax Code and Domestic Manufacturing	CQ Transcriptions		Senate Finance Committee Holds Hearing on the Tax Code and Domestic Manufacturing	March 16, 2021 Tuesday	International	CQ Transcriptions	News								Senate Finance Committee Holds Hearing on the Tax Code and Domestic Manufacturing	Senate Finance Committee Holds Hearing on the Tax Code and Domestic Manufacturing	CQ Transcriptions		Senate Finance Committee Holds Hearing on the Tax Code and Domestic Manufacturing	March 16, 2021 Tuesday	International	CQ Transcriptions	News								Senate Finance Committee Holds Hearing on the Tax Code and Domestic Manufacturing	Senate Finance Committee Holds Hearing on the Tax Code and Domestic Manufacturing	CQ Transcriptions		Senate Finance Committee Holds Hearing on the Tax Code and Domestic Manufacturing	March 16, 2021 Tuesday
House Select Economic Disparity and Fairness in Growth Committee Holds Hearing on Family Caregiving and Economic Growth	December 8, 2021 Wednesday	International	CQ Transcriptions	News								House Select Economic Disparity and Fairness in Growth Committee Holds Hearing on Family Caregiving and Economic Growth	House Select Economic Disparity and Fairness in Growth Committee Holds Hearing on Family Caregiving and Economic Growth	CQ Transcriptions		House Select Economic Disparity and Fairness in Growth Committee Holds Hearing on Family Caregiving and Economic Growth	December 8, 2021 Wednesday	International	CQ Transcriptions	News								House Select Economic Disparity and Fairness in Growth Committee Holds Hearing on Family Caregiving and Economic Growth	House Select Economic Disparity and Fairness in Growth Committee Holds Hearing on Family Caregiving and Economic Growth	CQ Transcriptions		House Select Economic Disparity and Fairness in Growth Committee Holds Hearing on Family Caregiving and Economic Growth	December 8, 2021 Wednesday	International	CQ Transcriptions	News								House Select Economic Disparity and Fairness in Growth Committee Holds Hearing on Family Caregiving and Economic Growth	House Select Economic Disparity and Fairness in Growth Committee Holds Hearing on Family Caregiving and Economic Growth	CQ Transcriptions		House Select Economic Disparity and Fairness in Growth Committee Holds Hearing on Family Caregiving and Economic Growth	December 8, 2021 Wednesday
Senate Foreign Relations Committee Holds Hearing on the Nomination of John Sullivan to be Ambassador to Russia	October 30, 2019 Wednesday	International	CQ Transcriptions	News								Senate Foreign Relations Committee Holds Hearing on the Nomination of John Sullivan to be Ambassador to Russia	Senate Foreign Relations Committee Holds Hearing on the Nomination of John Sullivan to be Ambassador to Russia	CQ Transcriptions		Senate Foreign Relations Committee Holds Hearing on the Nomination of John Sullivan to be Ambassador to Russia	October 30, 2019 Wednesday	International	CQ Transcriptions	News								Senate Foreign Relations Committee Holds Hearing on the Nomination of John Sullivan to be Ambassador to Russia	Senate Foreign Relations Committee Holds Hearing on the Nomination of John Sullivan to be Ambassador to Russia	CQ Transcriptions		Senate Foreign Relations Committee Holds Hearing on the Nomination of John Sullivan to be Ambassador to Russia	October 30, 2019 Wednesday	International	CQ Transcriptions	News								Senate Foreign Relations Committee Holds Hearing on the Nomination of John Sullivan to be Ambassador to Russia	Senate Foreign Relations Committee Holds Hearing on the Nomination of John Sullivan to be Ambassador to Russia	CQ Transcriptions		Senate Foreign Relations Committee Holds Hearing on the Nomination of John Sullivan to be Ambassador to Russia	October 30, 2019 Wednesday
House Appropriations Subcommittee on Financial Services and General Government Holds Hearing on Universal Broadband	May 18, 2021 Tuesday	International	CQ Transcriptions	News								House Appropriations Subcommittee on Financial Services and General Government Holds Hearing on Universal Broadband	House Appropriations Subcommittee on Financial Services and General Government Holds Hearing on Universal Broadband	CQ Transcriptions		House Appropriations Subcommittee on Financial Services and General Government Holds Hearing on Universal Broadband	May 18, 2021 Tuesday	International	CQ Transcriptions	News								House Appropriations Subcommittee on Financial Services and General Government Holds Hearing on Universal Broadband	House Appropriations Subcommittee on Financial Services and General Government Holds Hearing on Universal Broadband	CQ Transcriptions		House Appropriations Subcommittee on Financial Services and General Government Holds Hearing on Universal Broadband	May 18, 2021 Tuesday	International	CQ Transcriptions	News								House Appropriations Subcommittee on Financial Services and General Government Holds Hearing on Universal Broadband	House Appropriations Subcommittee on Financial Services and General Government Holds Hearing on Universal Broadband	CQ Transcriptions		House Appropriations Subcommittee on Financial Services and General Government Holds Hearing on Universal Broadband	May 18, 2021 Tuesday
House Transportation and Infrastructure Subcommittee on Aviation Holds Hearing on Future of Aviation	March 12, 2019 Tuesday	International	CQ Transcriptions	News								House Transportation and Infrastructure Subcommittee on Aviation Holds Hearing on Future of Aviation	House Transportation and Infrastructure Subcommittee on Aviation Holds Hearing on Future of Aviation	CQ Transcriptions		House Transportation and Infrastructure Subcommittee on Aviation Holds Hearing on Future of Aviation	March 12, 2019 Tuesday	International	CQ Transcriptions	News								House Transportation and Infrastructure Subcommittee on Aviation Holds Hearing on Future of Aviation	House Transportation and Infrastructure Subcommittee on Aviation Holds Hearing on Future of Aviation	CQ Transcriptions		House Transportation and Infrastructure Subcommittee on Aviation Holds Hearing on Future of Aviation	March 12, 2019 Tuesday	International	CQ Transcriptions	News								House Transportation and Infrastructure Subcommittee on Aviation Holds Hearing on Future of Aviation	House Transportation and Infrastructure Subcommittee on Aviation Holds Hearing on Future of Aviation	CQ Transcriptions		House Transportation and Infrastructure Subcommittee on Aviation Holds Hearing on Future of Aviation	March 12, 2019 Tuesday
Senate Homeland Security and Governmental Affairs Committee Holds Hearing on Pending Nominations	March 4, 2021 Thursday	International	CQ Transcriptions	News								Senate Homeland Security and Governmental Affairs Committee Holds Hearing on Pending Nominations	Senate Homeland Security and Governmental Affairs Committee Holds Hearing on Pending Nominations	CQ Transcriptions		Senate Homeland Security and Governmental Affairs Committee Holds Hearing on Pending Nominations	March 4, 2021 Thursday	International	CQ Transcriptions	News								Senate Homeland Security and Governmental Affairs Committee Holds Hearing on Pending Nominations	Senate Homeland Security and Governmental Affairs Committee Holds Hearing on Pending Nominations	CQ Transcriptions		Senate Homeland Security and Governmental Affairs Committee Holds Hearing on Pending Nominations	March 4, 2021 Thursday	International	CQ Transcriptions	News								Senate Homeland Security and Governmental Affairs Committee Holds Hearing on Pending Nominations	Senate Homeland Security and Governmental Affairs Committee Holds Hearing on Pending Nominations	CQ Transcriptions		Senate Homeland Security and Governmental Affairs Committee Holds Hearing on Pending Nominations	March 4, 2021 Thursday
Senate Armed Services Holds Hearing on Pending Nominations	April 30, 2019 Tuesday	International	CQ Transcriptions	News								Senate Armed Services Holds Hearing on Pending Nominations	Senate Armed Services Holds Hearing on Pending Nominations	CQ Transcriptions		Senate Armed Services Holds Hearing on Pending Nominations	April 30, 2019 Tuesday	International	CQ Transcriptions	News								Senate Armed Services Holds Hearing on Pending Nominations	Senate Armed Services Holds Hearing on Pending Nominations	CQ Transcriptions		Senate Armed Services Holds Hearing on Pending Nominations	April 30, 2019 Tuesday	International	CQ Transcriptions	News								Senate Armed Services Holds Hearing on Pending Nominations	Senate Armed Services Holds Hearing on Pending Nominations	CQ Transcriptions		Senate Armed Services Holds Hearing on Pending Nominations	April 30, 2019 Tuesday
Senate Judiciary Committee Holds Hearing on Voting Rights	April 20, 2021 Tuesday	International	CQ Transcriptions	News								Senate Judiciary Committee Holds Hearing on Voting Rights	Senate Judiciary Committee Holds Hearing on Voting Rights	CQ Transcriptions		Senate Judiciary Committee Holds Hearing on Voting Rights	April 20, 2021 Tuesday	International	CQ Transcriptions	News								Senate Judiciary Committee Holds Hearing on Voting Rights	Senate Judiciary Committee Holds Hearing on Voting Rights	CQ Transcriptions		Senate Judiciary Committee Holds Hearing on Voting Rights	April 20, 2021 Tuesday	International	CQ Transcriptions	News								Senate Judiciary Committee Holds Hearing on Voting Rights	Senate Judiciary Committee Holds Hearing on Voting Rights	CQ Transcriptions		Senate Judiciary Committee Holds Hearing on Voting Rights	April 20, 2021 Tuesday
Senate Veterans' Affairs Committee Holds Hearing on Pending Nominations	May 19, 2021 Wednesday	International	CQ Transcriptions	News								Senate Veterans' Affairs Committee Holds Hearing on Pending Nominations	Senate Veterans' Affairs Committee Holds Hearing on Pending Nominations	CQ Transcriptions		Senate Veterans' Affairs Committee Holds Hearing on Pending Nominations	May 19, 2021 Wednesday	International	CQ Transcriptions	News								Senate Veterans' Affairs Committee Holds Hearing on Pending Nominations	Senate Veterans' Affairs Committee Holds Hearing on Pending Nominations	CQ Transcriptions		Senate Veterans' Affairs Committee Holds Hearing on Pending Nominations	May 19, 2021 Wednesday	International	CQ Transcriptions	News								Senate Veterans' Affairs Committee Holds Hearing on Pending Nominations	Senate Veterans' Affairs Committee Holds Hearing on Pending Nominations	CQ Transcriptions		Senate Veterans' Affairs Committee Holds Hearing on Pending Nominations	May 19, 2021 Wednesday
House Judiciary Subcommittee on The Constitution, Civil Rights and Civil Liberties Holds Hearing on Litigation Reform and Qualified Immunity, Part One	March 31, 2022 Thursday	International	CQ Transcriptions	News								House Judiciary Subcommittee on The Constitution, Civil Rights and Civil Liberties Holds Hearing on Litigation Reform and Qualified Immunity, Part One	House Judiciary Subcommittee on The Constitution, Civil Rights and Civil Liberties Holds Hearing on Litigation Reform and Qualified Immunity, Part One	CQ Transcriptions		House Judiciary Subcommittee on The Constitution, Civil Rights and Civil Liberties Holds Hearing on Litigation Reform and Qualified Immunity, Part One	March 31, 2022 Thursday	International	CQ Transcriptions	News								House Judiciary Subcommittee on The Constitution, Civil Rights and Civil Liberties Holds Hearing on Litigation Reform and Qualified Immunity, Part One	House Judiciary Subcommittee on The Constitution, Civil Rights and Civil Liberties Holds Hearing on Litigation Reform and Qualified Immunity, Part One	CQ Transcriptions		House Judiciary Subcommittee on The Constitution, Civil Rights and Civil Liberties Holds Hearing on Litigation Reform and Qualified Immunity, Part One	March 31, 2022 Thursday	International	CQ Transcriptions	News								House Judiciary Subcommittee on The Constitution, Civil Rights and Civil Liberties Holds Hearing on Litigation Reform and Qualified Immunity, Part One	House Judiciary Subcommittee on The Constitution, Civil Rights and Civil Liberties Holds Hearing on Litigation Reform and Qualified Immunity, Part One	CQ Transcriptions		House Judiciary Subcommittee on The Constitution, Civil Rights and Civil Liberties Holds Hearing on Litigation Reform and Qualified Immunity, Part One	March 31, 2022 Thursday
Senate Health, Education, Labor, and Pensions Committee Holds Hearing on Labor and the Right to Organize	July 22, 2021 Thursday	International	CQ Transcriptions	News								Senate Health, Education, Labor, and Pensions Committee Holds Hearing on Labor and the Right to Organize	Senate Health, Education, Labor, and Pensions Committee Holds Hearing on Labor and the Right to Organize	CQ Transcriptions		Senate Health, Education, Labor, and Pensions Committee Holds Hearing on Labor and the Right to Organize	July 22, 2021 Thursday	International	CQ Transcriptions	News								Senate Health, Education, Labor, and Pensions Committee Holds Hearing on Labor and the Right to Organize	Senate Health, Education, Labor, and Pensions Committee Holds Hearing on Labor and the Right to Organize	CQ Transcriptions		Senate Health, Education, Labor, and Pensions Committee Holds Hearing on Labor and the Right to Organize	July 22, 2021 Thursday	International	CQ Transcriptions	News								Senate Health, Education, Labor, and Pensions Committee Holds Hearing on Labor and the Right to Organize	Senate Health, Education, Labor, and Pensions Committee Holds Hearing on Labor and the Right to Organize	CQ Transcriptions		Senate Health, Education, Labor, and Pensions Committee Holds Hearing on Labor and the Right to Organize	July 22, 2021 Thursday
US-China Economic and Security Review Commission Holds Hearing on US -China Relations	September 4, 2019 Wednesday	International	CQ Transcriptions	News								US-China Economic and Security Review Commission Holds Hearing on US -China Relations	US-China Economic and Security Review Commission Holds Hearing on US -China Relations	CQ Transcriptions		US-China Economic and Security Review Commission Holds Hearing on US -China Relations	September 4, 2019 Wednesday	International	CQ Transcriptions	News								US-China Economic and Security Review Commission Holds Hearing on US -China Relations	US-China Economic and Security Review Commission Holds Hearing on US -China Relations	CQ Transcriptions		US-China Economic and Security Review Commission Holds Hearing on US -China Relations	September 4, 2019 Wednesday	International	CQ Transcriptions	News								US-China Economic and Security Review Commission Holds Hearing on US -China Relations	US-China Economic and Security Review Commission Holds Hearing on US -China Relations	CQ Transcriptions		US-China Economic and Security Review Commission Holds Hearing on US -China Relations	September 4, 2019 Wednesday
Senate Armed Services Committee Holds Hearing on Pending Nominations	February 17, 2022 Thursday	International	CQ Transcriptions	News								Senate Armed Services Committee Holds Hearing on Pending Nominations	Senate Armed Services Committee Holds Hearing on Pending Nominations	CQ Transcriptions		Senate Armed Services Committee Holds Hearing on Pending Nominations	February 17, 2022 Thursday	International	CQ Transcriptions	News								Senate Armed Services Committee Holds Hearing on Pending Nominations	Senate Armed Services Committee Holds Hearing on Pending Nominations	CQ Transcriptions		Senate Armed Services Committee Holds Hearing on Pending Nominations	February 17, 2022 Thursday	International	CQ Transcriptions	News								Senate Armed Services Committee Holds Hearing on Pending Nominations	Senate Armed Services Committee Holds Hearing on Pending Nominations	CQ Transcriptions		Senate Armed Services Committee Holds Hearing on Pending Nominations	February 17, 2022 Thursday
House Armed Services Subcommittee on Military Personnel Holds Hearing on Transgender Military Service Policy	February 27, 2019 Wednesday	International	CQ Transcriptions	News								House Armed Services Subcommittee on Military Personnel Holds Hearing on Transgender Military Service Policy	House Armed Services Subcommittee on Military Personnel Holds Hearing on Transgender Military Service Policy	CQ Transcriptions		House Armed Services Subcommittee on Military Personnel Holds Hearing on Transgender Military Service Policy	February 27, 2019 Wednesday	International	CQ Transcriptions	News								House Armed Services Subcommittee on Military Personnel Holds Hearing on Transgender Military Service Policy	House Armed Services Subcommittee on Military Personnel Holds Hearing on Transgender Military Service Policy	CQ Transcriptions		House Armed Services Subcommittee on Military Personnel Holds Hearing on Transgender Military Service Policy	February 27, 2019 Wednesday	International	CQ Transcriptions	News								House Armed Services Subcommittee on Military Personnel Holds Hearing on Transgender Military Service Policy	House Armed Services Subcommittee on Military Personnel Holds Hearing on Transgender Military Service Policy	CQ Transcriptions		House Armed Services Subcommittee on Military Personnel Holds Hearing on Transgender Military Service Policy	February 27, 2019 Wednesday
House Appropriations Subcommittee on Energy and Water Development Holds Hearing on Fiscal 2020 Budget Request for the Energy Department and National Nuclear Security Administration	April 2, 2019 Tuesday	International	CQ Transcriptions	News								House Appropriations Subcommittee on Energy and Water Development Holds Hearing on Fiscal 2020 Budget Request for the Energy Department and National Nuclear Security Administration	House Appropriations Subcommittee on Energy and Water Development Holds Hearing on Fiscal 2020 Budget Request for the Energy Department and National Nuclear Security Administration	CQ Transcriptions		House Appropriations Subcommittee on Energy and Water Development Holds Hearing on Fiscal 2020 Budget Request for the Energy Department and National Nuclear Security Administration	April 2, 2019 Tuesday	International	CQ Transcriptions	News								House Appropriations Subcommittee on Energy and Water Development Holds Hearing on Fiscal 2020 Budget Request for the Energy Department and National Nuclear Security Administration	House Appropriations Subcommittee on Energy and Water Development Holds Hearing on Fiscal 2020 Budget Request for the Energy Department and National Nuclear Security Administration	CQ Transcriptions		House Appropriations Subcommittee on Energy and Water Development Holds Hearing on Fiscal 2020 Budget Request for the Energy Department and National Nuclear Security Administration	April 2, 2019 Tuesday	International	CQ Transcriptions	News								House Appropriations Subcommittee on Energy and Water Development Holds Hearing on Fiscal 2020 Budget Request for the Energy Department and National Nuclear Security Administration	House Appropriations Subcommittee on Energy and Water Development Holds Hearing on Fiscal 2020 Budget Request for the Energy Department and National Nuclear Security Administration	CQ Transcriptions		House Appropriations Subcommittee on Energy and Water Development Holds Hearing on Fiscal 2020 Budget Request for the Energy Department and National Nuclear Security Administration	April 2, 2019 Tuesday
US-China Economic and Security Review Commission Holds Meeting on China's Nuclear Forces	June 10, 2021 Thursday	International	CQ Transcriptions	News								US-China Economic and Security Review Commission Holds Meeting on China's Nuclear Forces	US-China Economic and Security Review Commission Holds Meeting on China's Nuclear Forces	CQ Transcriptions		US-China Economic and Security Review Commission Holds Meeting on China's Nuclear Forces	June 10, 2021 Thursday	International	CQ Transcriptions	News								US-China Economic and Security Review Commission Holds Meeting on China's Nuclear Forces	US-China Economic and Security Review Commission Holds Meeting on China's Nuclear Forces	CQ Transcriptions		US-China Economic and Security Review Commission Holds Meeting on China's Nuclear Forces	June 10, 2021 Thursday	International	CQ Transcriptions	News								US-China Economic and Security Review Commission Holds Meeting on China's Nuclear Forces	US-China Economic and Security Review Commission Holds Meeting on China's Nuclear Forces	CQ Transcriptions		US-China Economic and Security Review Commission Holds Meeting on China's Nuclear Forces	June 10, 2021 Thursday
Senate Armed Services Subcommittee on Personnel Holds Hearing on Military Personnel Policies and Family Readiness	February 27, 2019 Wednesday	International	CQ Transcriptions	News								Senate Armed Services Subcommittee on Personnel Holds Hearing on Military Personnel Policies and Family Readiness	Senate Armed Services Subcommittee on Personnel Holds Hearing on Military Personnel Policies and Family Readiness	CQ Transcriptions		Senate Armed Services Subcommittee on Personnel Holds Hearing on Military Personnel Policies and Family Readiness	February 27, 2019 Wednesday	International	CQ Transcriptions	News								Senate Armed Services Subcommittee on Personnel Holds Hearing on Military Personnel Policies and Family Readiness	Senate Armed Services Subcommittee on Personnel Holds Hearing on Military Personnel Policies and Family Readiness	CQ Transcriptions		Senate Armed Services Subcommittee on Personnel Holds Hearing on Military Personnel Policies and Family Readiness	February 27, 2019 Wednesday	International	CQ Transcriptions	News								Senate Armed Services Subcommittee on Personnel Holds Hearing on Military Personnel Policies and Family Readiness	Senate Armed Services Subcommittee on Personnel Holds Hearing on Military Personnel Policies and Family Readiness	CQ Transcriptions		Senate Armed Services Subcommittee on Personnel Holds Hearing on Military Personnel Policies and Family Readiness	February 27, 2019 Wednesday
House Appropriations Subcommittee on Agriculture, Rural Development and Food and Drug Administration Holds Hearing on Economic Research and National Institute of Food-Agriculture Relocation	March 27, 2019 Wednesday	International	CQ Transcriptions	News								House Appropriations Subcommittee on Agriculture, Rural Development and Food and Drug Administration Holds Hearing on Economic Research and National Institute of Food-Agriculture Relocation	House Appropriations Subcommittee on Agriculture, Rural Development and Food and Drug Administration Holds Hearing on Economic Research and National Institute of Food-Agriculture Relocation	CQ Transcriptions		House Appropriations Subcommittee on Agriculture, Rural Development and Food and Drug Administration Holds Hearing on Economic Research and National Institute of Food-Agriculture Relocation	March 27, 2019 Wednesday	International	CQ Transcriptions	News								House Appropriations Subcommittee on Agriculture, Rural Development and Food and Drug Administration Holds Hearing on Economic Research and National Institute of Food-Agriculture Relocation	House Appropriations Subcommittee on Agriculture, Rural Development and Food and Drug Administration Holds Hearing on Economic Research and National Institute of Food-Agriculture Relocation	CQ Transcriptions		House Appropriations Subcommittee on Agriculture, Rural Development and Food and Drug Administration Holds Hearing on Economic Research and National Institute of Food-Agriculture Relocation	March 27, 2019 Wednesday	International	CQ Transcriptions	News								House Appropriations Subcommittee on Agriculture, Rural Development and Food and Drug Administration Holds Hearing on Economic Research and National Institute of Food-Agriculture Relocation	House Appropriations Subcommittee on Agriculture, Rural Development and Food and Drug Administration Holds Hearing on Economic Research and National Institute of Food-Agriculture Relocation	CQ Transcriptions		House Appropriations Subcommittee on Agriculture, Rural Development and Food and Drug Administration Holds Hearing on Economic Research and National Institute of Food-Agriculture Relocation	March 27, 2019 Wednesday
House Appropriations Subcommittee on Interior and Environment Holds Hearing on Non-Tribal Programs - Public Witnesses, Morning Session	February 6, 2020 Thursday	International	CQ Transcriptions	News								House Appropriations Subcommittee on Interior and Environment Holds Hearing on Non-Tribal Programs - Public Witnesses, Morning Session	House Appropriations Subcommittee on Interior and Environment Holds Hearing on Non-Tribal Programs - Public Witnesses, Morning Session	CQ Transcriptions		House Appropriations Subcommittee on Interior and Environment Holds Hearing on Non-Tribal Programs - Public Witnesses, Morning Session	February 6, 2020 Thursday	International	CQ Transcriptions	News								House Appropriations Subcommittee on Interior and Environment Holds Hearing on Non-Tribal Programs - Public Witnesses, Morning Session	House Appropriations Subcommittee on Interior and Environment Holds Hearing on Non-Tribal Programs - Public Witnesses, Morning Session	CQ Transcriptions		House Appropriations Subcommittee on Interior and Environment Holds Hearing on Non-Tribal Programs - Public Witnesses, Morning Session	February 6, 2020 Thursday	International	CQ Transcriptions	News								House Appropriations Subcommittee on Interior and Environment Holds Hearing on Non-Tribal Programs - Public Witnesses, Morning Session	House Appropriations Subcommittee on Interior and Environment Holds Hearing on Non-Tribal Programs - Public Witnesses, Morning Session	CQ Transcriptions		House Appropriations Subcommittee on Interior and Environment Holds Hearing on Non-Tribal Programs - Public Witnesses, Morning Session	February 6, 2020 Thursday
Senate Appropriations Subcommittee on Transportation, Housing and Urban Development Holds Hearing on Fiscal 2022 Budget Request for the Transportation Department	June 16, 2021 Wednesday	International	CQ Transcriptions	News								Senate Appropriations Subcommittee on Transportation, Housing and Urban Development Holds Hearing on Fiscal 2022 Budget Request for the Transportation Department	Senate Appropriations Subcommittee on Transportation, Housing and Urban Development Holds Hearing on Fiscal 2022 Budget Request for the Transportation Department	CQ Transcriptions		Senate Appropriations Subcommittee on Transportation, Housing and Urban Development Holds Hearing on Fiscal 2022 Budget Request for the Transportation Department	June 16, 2021 Wednesday	International	CQ Transcriptions	News								Senate Appropriations Subcommittee on Transportation, Housing and Urban Development Holds Hearing on Fiscal 2022 Budget Request for the Transportation Department	Senate Appropriations Subcommittee on Transportation, Housing and Urban Development Holds Hearing on Fiscal 2022 Budget Request for the Transportation Department	CQ Transcriptions		Senate Appropriations Subcommittee on Transportation, Housing and Urban Development Holds Hearing on Fiscal 2022 Budget Request for the Transportation Department	June 16, 2021 Wednesday	International	CQ Transcriptions	News								Senate Appropriations Subcommittee on Transportation, Housing and Urban Development Holds Hearing on Fiscal 2022 Budget Request for the Transportation Department	Senate Appropriations Subcommittee on Transportation, Housing and Urban Development Holds Hearing on Fiscal 2022 Budget Request for the Transportation Department	CQ Transcriptions		Senate Appropriations Subcommittee on Transportation, Housing and Urban Development Holds Hearing on Fiscal 2022 Budget Request for the Transportation Department	June 16, 2021 Wednesday
House Financial Services Committee Holds Hearing on Consumer Financial Protection Bureau Review	March 7, 2019 Thursday	International	CQ Transcriptions	News								House Financial Services Committee Holds Hearing on Consumer Financial Protection Bureau Review	House Financial Services Committee Holds Hearing on Consumer Financial Protection Bureau Review	CQ Transcriptions		House Financial Services Committee Holds Hearing on Consumer Financial Protection Bureau Review	March 7, 2019 Thursday	International	CQ Transcriptions	News								House Financial Services Committee Holds Hearing on Consumer Financial Protection Bureau Review	House Financial Services Committee Holds Hearing on Consumer Financial Protection Bureau Review	CQ Transcriptions		House Financial Services Committee Holds Hearing on Consumer Financial Protection Bureau Review	March 7, 2019 Thursday	International	CQ Transcriptions	News								House Financial Services Committee Holds Hearing on Consumer Financial Protection Bureau Review	House Financial Services Committee Holds Hearing on Consumer Financial Protection Bureau Review	CQ Transcriptions		House Financial Services Committee Holds Hearing on Consumer Financial Protection Bureau Review	March 7, 2019 Thursday
House Appropriations Subcommittee on Commerce, Justice, Science and Related Agencies Holds Hearing on Fiscal Year 2023 National Science Foundation Budget Request	May 11, 2022 Wednesday	International	CQ Transcriptions	News								House Appropriations Subcommittee on Commerce, Justice, Science and Related Agencies Holds Hearing on Fiscal Year 2023 National Science Foundation Budget Request	House Appropriations Subcommittee on Commerce, Justice, Science and Related Agencies Holds Hearing on Fiscal Year 2023 National Science Foundation Budget Request	CQ Transcriptions		House Appropriations Subcommittee on Commerce, Justice, Science and Related Agencies Holds Hearing on Fiscal Year 2023 National Science Foundation Budget Request	May 11, 2022 Wednesday	International	CQ Transcriptions	News								House Appropriations Subcommittee on Commerce, Justice, Science and Related Agencies Holds Hearing on Fiscal Year 2023 National Science Foundation Budget Request	House Appropriations Subcommittee on Commerce, Justice, Science and Related Agencies Holds Hearing on Fiscal Year 2023 National Science Foundation Budget Request	CQ Transcriptions		House Appropriations Subcommittee on Commerce, Justice, Science and Related Agencies Holds Hearing on Fiscal Year 2023 National Science Foundation Budget Request	May 11, 2022 Wednesday	International	CQ Transcriptions	News								House Appropriations Subcommittee on Commerce, Justice, Science and Related Agencies Holds Hearing on Fiscal Year 2023 National Science Foundation Budget Request	House Appropriations Subcommittee on Commerce, Justice, Science and Related Agencies Holds Hearing on Fiscal Year 2023 National Science Foundation Budget Request	CQ Transcriptions		House Appropriations Subcommittee on Commerce, Justice, Science and Related Agencies Holds Hearing on Fiscal Year 2023 National Science Foundation Budget Request	May 11, 2022 Wednesday
House Armed Services Committee Holds Hearing on the Fiscal Year 2024 Department of the Army Budget Request	April 19, 2023 Wednesday	International	CQ Transcriptions	News								House Armed Services Committee Holds Hearing on the Fiscal Year 2024 Department of the Army Budget Request	House Armed Services Committee Holds Hearing on the Fiscal Year 2024 Department of the Army Budget Request	CQ Transcriptions		House Armed Services Committee Holds Hearing on the Fiscal Year 2024 Department of the Army Budget Request	April 19, 2023 Wednesday	International	CQ Transcriptions	News								House Armed Services Committee Holds Hearing on the Fiscal Year 2024 Department of the Army Budget Request	House Armed Services Committee Holds Hearing on the Fiscal Year 2024 Department of the Army Budget Request	CQ Transcriptions		House Armed Services Committee Holds Hearing on the Fiscal Year 2024 Department of the Army Budget Request	April 19, 2023 Wednesday	International	CQ Transcriptions	News								House Armed Services Committee Holds Hearing on the Fiscal Year 2024 Department of the Army Budget Request	House Armed Services Committee Holds Hearing on the Fiscal Year 2024 Department of the Army Budget Request	CQ Transcriptions		House Armed Services Committee Holds Hearing on the Fiscal Year 2024 Department of the Army Budget Request	April 19, 2023 Wednesday
House Transportation and Infrastructure Subcommittee on Coast Guard and Maritime Transportation Holds Hearing on US-Flag Fleet and Shipbuilding Industry	July 9, 2024 Tuesday	International	CQ Transcriptions	News								House Transportation and Infrastructure Subcommittee on Coast Guard and Maritime Transportation Holds Hearing on US-Flag Fleet and Shipbuilding Industry	House Transportation and Infrastructure Subcommittee on Coast Guard and Maritime Transportation Holds Hearing on US-Flag Fleet and Shipbuilding Industry	CQ Transcriptions		House Transportation and Infrastructure Subcommittee on Coast Guard and Maritime Transportation Holds Hearing on US-Flag Fleet and Shipbuilding Industry	July 9, 2024 Tuesday	International	CQ Transcriptions	News								House Transportation and Infrastructure Subcommittee on Coast Guard and Maritime Transportation Holds Hearing on US-Flag Fleet and Shipbuilding Industry	House Transportation and Infrastructure Subcommittee on Coast Guard and Maritime Transportation Holds Hearing on US-Flag Fleet and Shipbuilding Industry	CQ Transcriptions		House Transportation and Infrastructure Subcommittee on Coast Guard and Maritime Transportation Holds Hearing on US-Flag Fleet and Shipbuilding Industry	July 9, 2024 Tuesday	International	CQ Transcriptions	News								House Transportation and Infrastructure Subcommittee on Coast Guard and Maritime Transportation Holds Hearing on US-Flag Fleet and Shipbuilding Industry	House Transportation and Infrastructure Subcommittee on Coast Guard and Maritime Transportation Holds Hearing on US-Flag Fleet and Shipbuilding Industry	CQ Transcriptions		House Transportation and Infrastructure Subcommittee on Coast Guard and Maritime Transportation Holds Hearing on US-Flag Fleet and Shipbuilding Industry	July 9, 2024 Tuesday
House Appropriations Subcommittee on Labor, Health and Human Services and Education Holds Hearing on Fiscal 2022 Budget Request for the Labor Department	April 28, 2021 Wednesday	International	CQ Transcriptions	News								House Appropriations Subcommittee on Labor, Health and Human Services and Education Holds Hearing on Fiscal 2022 Budget Request for the Labor Department	House Appropriations Subcommittee on Labor, Health and Human Services and Education Holds Hearing on Fiscal 2022 Budget Request for the Labor Department	CQ Transcriptions		House Appropriations Subcommittee on Labor, Health and Human Services and Education Holds Hearing on Fiscal 2022 Budget Request for the Labor Department	April 28, 2021 Wednesday	International	CQ Transcriptions	News								House Appropriations Subcommittee on Labor, Health and Human Services and Education Holds Hearing on Fiscal 2022 Budget Request for the Labor Department	House Appropriations Subcommittee on Labor, Health and Human Services and Education Holds Hearing on Fiscal 2022 Budget Request for the Labor Department	CQ Transcriptions		House Appropriations Subcommittee on Labor, Health and Human Services and Education Holds Hearing on Fiscal 2022 Budget Request for the Labor Department	April 28, 2021 Wednesday	International	CQ Transcriptions	News								House Appropriations Subcommittee on Labor, Health and Human Services and Education Holds Hearing on Fiscal 2022 Budget Request for the Labor Department	House Appropriations Subcommittee on Labor, Health and Human Services and Education Holds Hearing on Fiscal 2022 Budget Request for the Labor Department	CQ Transcriptions		House Appropriations Subcommittee on Labor, Health and Human Services and Education Holds Hearing on Fiscal 2022 Budget Request for the Labor Department	April 28, 2021 Wednesday
House Energy and Commerce Subcommittee on Innovation, Data and Commerce Holds Hearing on Safeguarding Data and Innovation	October 18, 2023 Wednesday	International	CQ Transcriptions	News								House Energy and Commerce Subcommittee on Innovation, Data and Commerce Holds Hearing on Safeguarding Data and Innovation	House Energy and Commerce Subcommittee on Innovation, Data and Commerce Holds Hearing on Safeguarding Data and Innovation	CQ Transcriptions		House Energy and Commerce Subcommittee on Innovation, Data and Commerce Holds Hearing on Safeguarding Data and Innovation	October 18, 2023 Wednesday	International	CQ Transcriptions	News								House Energy and Commerce Subcommittee on Innovation, Data and Commerce Holds Hearing on Safeguarding Data and Innovation	House Energy and Commerce Subcommittee on Innovation, Data and Commerce Holds Hearing on Safeguarding Data and Innovation	CQ Transcriptions		House Energy and Commerce Subcommittee on Innovation, Data and Commerce Holds Hearing on Safeguarding Data and Innovation	October 18, 2023 Wednesday	International	CQ Transcriptions	News								House Energy and Commerce Subcommittee on Innovation, Data and Commerce Holds Hearing on Safeguarding Data and Innovation	House Energy and Commerce Subcommittee on Innovation, Data and Commerce Holds Hearing on Safeguarding Data and Innovation	CQ Transcriptions		House Energy and Commerce Subcommittee on Innovation, Data and Commerce Holds Hearing on Safeguarding Data and Innovation	October 18, 2023 Wednesday
House Appropriations Subcommittee on Labor, Health and Human Services and Education Holds Hearing on Unaccompanied Children Program Oversight	July 24, 2019 Wednesday	International	CQ Transcriptions	News								House Appropriations Subcommittee on Labor, Health and Human Services and Education Holds Hearing on Unaccompanied Children Program Oversight	House Appropriations Subcommittee on Labor, Health and Human Services and Education Holds Hearing on Unaccompanied Children Program Oversight	CQ Transcriptions		House Appropriations Subcommittee on Labor, Health and Human Services and Education Holds Hearing on Unaccompanied Children Program Oversight	July 24, 2019 Wednesday	International	CQ Transcriptions	News								House Appropriations Subcommittee on Labor, Health and Human Services and Education Holds Hearing on Unaccompanied Children Program Oversight	House Appropriations Subcommittee on Labor, Health and Human Services and Education Holds Hearing on Unaccompanied Children Program Oversight	CQ Transcriptions		House Appropriations Subcommittee on Labor, Health and Human Services and Education Holds Hearing on Unaccompanied Children Program Oversight	July 24, 2019 Wednesday	International	CQ Transcriptions	News								House Appropriations Subcommittee on Labor, Health and Human Services and Education Holds Hearing on Unaccompanied Children Program Oversight	House Appropriations Subcommittee on Labor, Health and Human Services and Education Holds Hearing on Unaccompanied Children Program Oversight	CQ Transcriptions		House Appropriations Subcommittee on Labor, Health and Human Services and Education Holds Hearing on Unaccompanied Children Program Oversight	July 24, 2019 Wednesday
House Oversight and Reform Subcommittee on Environment Holds Hearing on PFAS Contamination and Corporate Accountability	September 10, 2019 Tuesday	International	CQ Transcriptions	News								House Oversight and Reform Subcommittee on Environment Holds Hearing on PFAS Contamination and Corporate Accountability	House Oversight and Reform Subcommittee on Environment Holds Hearing on PFAS Contamination and Corporate Accountability	CQ Transcriptions		House Oversight and Reform Subcommittee on Environment Holds Hearing on PFAS Contamination and Corporate Accountability	September 10, 2019 Tuesday	International	CQ Transcriptions	News								House Oversight and Reform Subcommittee on Environment Holds Hearing on PFAS Contamination and Corporate Accountability	House Oversight and Reform Subcommittee on Environment Holds Hearing on PFAS Contamination and Corporate Accountability	CQ Transcriptions		House Oversight and Reform Subcommittee on Environment Holds Hearing on PFAS Contamination and Corporate Accountability	September 10, 2019 Tuesday	International	CQ Transcriptions	News								House Oversight and Reform Subcommittee on Environment Holds Hearing on PFAS Contamination and Corporate Accountability	House Oversight and Reform Subcommittee on Environment Holds Hearing on PFAS Contamination and Corporate Accountability	CQ Transcriptions		House Oversight and Reform Subcommittee on Environment Holds Hearing on PFAS Contamination and Corporate Accountability	September 10, 2019 Tuesday
Senate Energy and Natural Resources Committee Holds Hearing on Fiscal 2020 Budget Request for the Energy Department	April 2, 2019 Tuesday	International	CQ Transcriptions	News								Senate Energy and Natural Resources Committee Holds Hearing on Fiscal 2020 Budget Request for the Energy Department	Senate Energy and Natural Resources Committee Holds Hearing on Fiscal 2020 Budget Request for the Energy Department	CQ Transcriptions		Senate Energy and Natural Resources Committee Holds Hearing on Fiscal 2020 Budget Request for the Energy Department	April 2, 2019 Tuesday	International	CQ Transcriptions	News								Senate Energy and Natural Resources Committee Holds Hearing on Fiscal 2020 Budget Request for the Energy Department	Senate Energy and Natural Resources Committee Holds Hearing on Fiscal 2020 Budget Request for the Energy Department	CQ Transcriptions		Senate Energy and Natural Resources Committee Holds Hearing on Fiscal 2020 Budget Request for the Energy Department	April 2, 2019 Tuesday	International	CQ Transcriptions	News								Senate Energy and Natural Resources Committee Holds Hearing on Fiscal 2020 Budget Request for the Energy Department	Senate Energy and Natural Resources Committee Holds Hearing on Fiscal 2020 Budget Request for the Energy Department	CQ Transcriptions		Senate Energy and Natural Resources Committee Holds Hearing on Fiscal 2020 Budget Request for the Energy Department	April 2, 2019 Tuesday
House Homeland Security Committee Holds Hearing on Elections	August 28, 2020 Friday	International	CQ Transcriptions	News								House Homeland Security Committee Holds Hearing on Elections	House Homeland Security Committee Holds Hearing on Elections	CQ Transcriptions		House Homeland Security Committee Holds Hearing on Elections	August 28, 2020 Friday	International	CQ Transcriptions	News								House Homeland Security Committee Holds Hearing on Elections	House Homeland Security Committee Holds Hearing on Elections	CQ Transcriptions		House Homeland Security Committee Holds Hearing on Elections	August 28, 2020 Friday	International	CQ Transcriptions	News								House Homeland Security Committee Holds Hearing on Elections	House Homeland Security Committee Holds Hearing on Elections	CQ Transcriptions		House Homeland Security Committee Holds Hearing on Elections	August 28, 2020 Friday
House Armed Services Subcommittee on Readiness Holds Hearing on Modernizing Military Depots	October 28, 2021 Thursday	International	CQ Transcriptions	News								House Armed Services Subcommittee on Readiness Holds Hearing on Modernizing Military Depots	House Armed Services Subcommittee on Readiness Holds Hearing on Modernizing Military Depots	CQ Transcriptions		House Armed Services Subcommittee on Readiness Holds Hearing on Modernizing Military Depots	October 28, 2021 Thursday	International	CQ Transcriptions	News								House Armed Services Subcommittee on Readiness Holds Hearing on Modernizing Military Depots	House Armed Services Subcommittee on Readiness Holds Hearing on Modernizing Military Depots	CQ Transcriptions		House Armed Services Subcommittee on Readiness Holds Hearing on Modernizing Military Depots	October 28, 2021 Thursday	International	CQ Transcriptions	News								House Armed Services Subcommittee on Readiness Holds Hearing on Modernizing Military Depots	House Armed Services Subcommittee on Readiness Holds Hearing on Modernizing Military Depots	CQ Transcriptions		House Armed Services Subcommittee on Readiness Holds Hearing on Modernizing Military Depots	October 28, 2021 Thursday
House Transportation and Infrastructure Subcommittee on Railroads, Pipelines, and Hazardous Materials Holds Hearing on the Surface Transportation Board and Passenger Rail s	November 18, 2020 Wednesday	International	CQ Transcriptions	News								House Transportation and Infrastructure Subcommittee on Railroads, Pipelines, and Hazardous Materials Holds Hearing on the Surface Transportation Board and Passenger Rail s	House Transportation and Infrastructure Subcommittee on Railroads, Pipelines, and Hazardous Materials Holds Hearing on the Surface Transportation Board and Passenger Rail s	CQ Transcriptions		House Transportation and Infrastructure Subcommittee on Railroads, Pipelines, and Hazardous Materials Holds Hearing on the Surface Transportation Board and Passenger Rail s	November 18, 2020 Wednesday	International	CQ Transcriptions	News								House Transportation and Infrastructure Subcommittee on Railroads, Pipelines, and Hazardous Materials Holds Hearing on the Surface Transportation Board and Passenger Rail s	House Transportation and Infrastructure Subcommittee on Railroads, Pipelines, and Hazardous Materials Holds Hearing on the Surface Transportation Board and Passenger Rail s	CQ Transcriptions		House Transportation and Infrastructure Subcommittee on Railroads, Pipelines, and Hazardous Materials Holds Hearing on the Surface Transportation Board and Passenger Rail s	November 18, 2020 Wednesday	International	CQ Transcriptions	News								House Transportation and Infrastructure Subcommittee on Railroads, Pipelines, and Hazardous Materials Holds Hearing on the Surface Transportation Board and Passenger Rail s	House Transportation and Infrastructure Subcommittee on Railroads, Pipelines, and Hazardous Materials Holds Hearing on the Surface Transportation Board and Passenger Rail s	CQ Transcriptions		House Transportation and Infrastructure Subcommittee on Railroads, Pipelines, and Hazardous Materials Holds Hearing on the Surface Transportation Board and Passenger Rail s	November 18, 2020 Wednesday
House Appropriations Subcommittee on Interior, Environment and Related Agencies Holds Hearing on Agency Spending Restrictions During Government Shutdown	February 6, 2019 Wednesday	International	CQ Transcriptions	News								House Appropriations Subcommittee on Interior, Environment and Related Agencies Holds Hearing on Agency Spending Restrictions During Government Shutdown	House Appropriations Subcommittee on Interior, Environment and Related Agencies Holds Hearing on Agency Spending Restrictions During Government Shutdown	CQ Transcriptions		House Appropriations Subcommittee on Interior, Environment and Related Agencies Holds Hearing on Agency Spending Restrictions During Government Shutdown	February 6, 2019 Wednesday	International	CQ Transcriptions	News								House Appropriations Subcommittee on Interior, Environment and Related Agencies Holds Hearing on Agency Spending Restrictions During Government Shutdown	House Appropriations Subcommittee on Interior, Environment and Related Agencies Holds Hearing on Agency Spending Restrictions During Government Shutdown	CQ Transcriptions		House Appropriations Subcommittee on Interior, Environment and Related Agencies Holds Hearing on Agency Spending Restrictions During Government Shutdown	February 6, 2019 Wednesday	International	CQ Transcriptions	News								House Appropriations Subcommittee on Interior, Environment and Related Agencies Holds Hearing on Agency Spending Restrictions During Government Shutdown	House Appropriations Subcommittee on Interior, Environment and Related Agencies Holds Hearing on Agency Spending Restrictions During Government Shutdown	CQ Transcriptions		House Appropriations Subcommittee on Interior, Environment and Related Agencies Holds Hearing on Agency Spending Restrictions During Government Shutdown	February 6, 2019 Wednesday
House Foreign Affairs Committee Holds Hearing on the NATO Alliance	March 13, 2019 Wednesday	International	CQ Transcriptions	News								House Foreign Affairs Committee Holds Hearing on the NATO Alliance	House Foreign Affairs Committee Holds Hearing on the NATO Alliance	CQ Transcriptions		House Foreign Affairs Committee Holds Hearing on the NATO Alliance	March 13, 2019 Wednesday	International	CQ Transcriptions	News								House Foreign Affairs Committee Holds Hearing on the NATO Alliance	House Foreign Affairs Committee Holds Hearing on the NATO Alliance	CQ Transcriptions		House Foreign Affairs Committee Holds Hearing on the NATO Alliance	March 13, 2019 Wednesday	International	CQ Transcriptions	News								House Foreign Affairs Committee Holds Hearing on the NATO Alliance	House Foreign Affairs Committee Holds Hearing on the NATO Alliance	CQ Transcriptions		House Foreign Affairs Committee Holds Hearing on the NATO Alliance	March 13, 2019 Wednesday
Senate Judiciary Committee Holds Hearing on the Nomination of Ketanji Brown Jackson to be an Associate Justice on the Supreme Court of the United States , Day 4	March 24, 2022 Thursday	International	CQ Transcriptions	News								Senate Judiciary Committee Holds Hearing on the Nomination of Ketanji Brown Jackson to be an Associate Justice on the Supreme Court of the United States , Day 4	Senate Judiciary Committee Holds Hearing on the Nomination of Ketanji Brown Jackson to be an Associate Justice on the Supreme Court of the United States , Day 4	CQ Transcriptions		Senate Judiciary Committee Holds Hearing on the Nomination of Ketanji Brown Jackson to be an Associate Justice on the Supreme Court of the United States , Day 4	March 24, 2022 Thursday	International	CQ Transcriptions	News								Senate Judiciary Committee Holds Hearing on the Nomination of Ketanji Brown Jackson to be an Associate Justice on the Supreme Court of the United States , Day 4	Senate Judiciary Committee Holds Hearing on the Nomination of Ketanji Brown Jackson to be an Associate Justice on the Supreme Court of the United States , Day 4	CQ Transcriptions		Senate Judiciary Committee Holds Hearing on the Nomination of Ketanji Brown Jackson to be an Associate Justice on the Supreme Court of the United States , Day 4	March 24, 2022 Thursday	International	CQ Transcriptions	News								Senate Judiciary Committee Holds Hearing on the Nomination of Ketanji Brown Jackson to be an Associate Justice on the Supreme Court of the United States , Day 4	Senate Judiciary Committee Holds Hearing on the Nomination of Ketanji Brown Jackson to be an Associate Justice on the Supreme Court of the United States , Day 4	CQ Transcriptions		Senate Judiciary Committee Holds Hearing on the Nomination of Ketanji Brown Jackson to be an Associate Justice on the Supreme Court of the United States , Day 4	March 24, 2022 Thursday
Senate Appropriations Subcommittee on Interior and Environment Holds Hearing on Fiscal 2020 Budget Request for Indian Health Service	May 1, 2019 Wednesday	International	CQ Transcriptions	News								Senate Appropriations Subcommittee on Interior and Environment Holds Hearing on Fiscal 2020 Budget Request for Indian Health Service	Senate Appropriations Subcommittee on Interior and Environment Holds Hearing on Fiscal 2020 Budget Request for Indian Health Service	CQ Transcriptions		Senate Appropriations Subcommittee on Interior and Environment Holds Hearing on Fiscal 2020 Budget Request for Indian Health Service	May 1, 2019 Wednesday	International	CQ Transcriptions	News								Senate Appropriations Subcommittee on Interior and Environment Holds Hearing on Fiscal 2020 Budget Request for Indian Health Service	Senate Appropriations Subcommittee on Interior and Environment Holds Hearing on Fiscal 2020 Budget Request for Indian Health Service	CQ Transcriptions		Senate Appropriations Subcommittee on Interior and Environment Holds Hearing on Fiscal 2020 Budget Request for Indian Health Service	May 1, 2019 Wednesday	International	CQ Transcriptions	News								Senate Appropriations Subcommittee on Interior and Environment Holds Hearing on Fiscal 2020 Budget Request for Indian Health Service	Senate Appropriations Subcommittee on Interior and Environment Holds Hearing on Fiscal 2020 Budget Request for Indian Health Service	CQ Transcriptions		Senate Appropriations Subcommittee on Interior and Environment Holds Hearing on Fiscal 2020 Budget Request for Indian Health Service	May 1, 2019 Wednesday
Senate Appropriations Subcommittee on Interior and Environment Holds Hearing on Fiscal 2020 Budget Request for Indian Health Service	May 1, 2019 Wednesday	International	CQ Transcriptions	News								Senate Appropriations Subcommittee on Interior and Environment Holds Hearing on Fiscal 2020 Budget Request for Indian Health Service	Senate Appropriations Subcommittee on Interior and Environment Holds Hearing on Fiscal 2020 Budget Request for Indian Health Service	CQ Transcriptions		Senate Appropriations Subcommittee on Interior and Environment Holds Hearing on Fiscal 2020 Budget Request for Indian Health Service	May 1, 2019 Wednesday	International	CQ Transcriptions	News								Senate Appropriations Subcommittee on Interior and Environment Holds Hearing on Fiscal 2020 Budget Request for Indian Health Service	Senate Appropriations Subcommittee on Interior and Environment Holds Hearing on Fiscal 2020 Budget Request for Indian Health Service	CQ Transcriptions		Senate Appropriations Subcommittee on Interior and Environment Holds Hearing on Fiscal 2020 Budget Request for Indian Health Service	May 1, 2019 Wednesday	International	CQ Transcriptions	News								Senate Appropriations Subcommittee on Interior and Environment Holds Hearing on Fiscal 2020 Budget Request for Indian Health Service	Senate Appropriations Subcommittee on Interior and Environment Holds Hearing on Fiscal 2020 Budget Request for Indian Health Service	CQ Transcriptions		Senate Appropriations Subcommittee on Interior and Environment Holds Hearing on Fiscal 2020 Budget Request for Indian Health Service	May 1, 2019 Wednesday
House Ways and Means Committee Holds Hearing on Legislative Proposals for Paid Family and Medical Leave	January 28, 2020 Tuesday	International	CQ Transcriptions	News								House Ways and Means Committee Holds Hearing on Legislative Proposals for Paid Family and Medical Leave	House Ways and Means Committee Holds Hearing on Legislative Proposals for Paid Family and Medical Leave	CQ Transcriptions		House Ways and Means Committee Holds Hearing on Legislative Proposals for Paid Family and Medical Leave	January 28, 2020 Tuesday	International	CQ Transcriptions	News								House Ways and Means Committee Holds Hearing on Legislative Proposals for Paid Family and Medical Leave	House Ways and Means Committee Holds Hearing on Legislative Proposals for Paid Family and Medical Leave	CQ Transcriptions		House Ways and Means Committee Holds Hearing on Legislative Proposals for Paid Family and Medical Leave	January 28, 2020 Tuesday	International	CQ Transcriptions	News								House Ways and Means Committee Holds Hearing on Legislative Proposals for Paid Family and Medical Leave	House Ways and Means Committee Holds Hearing on Legislative Proposals for Paid Family and Medical Leave	CQ Transcriptions		House Ways and Means Committee Holds Hearing on Legislative Proposals for Paid Family and Medical Leave	January 28, 2020 Tuesday
House Appropriations Subcommittee on Commerce, Justice and Science Holds Hearing on Climate Change Research	February 26, 2019 Tuesday	International	CQ Transcriptions	News								House Appropriations Subcommittee on Commerce, Justice and Science Holds Hearing on Climate Change Research	House Appropriations Subcommittee on Commerce, Justice and Science Holds Hearing on Climate Change Research	CQ Transcriptions		House Appropriations Subcommittee on Commerce, Justice and Science Holds Hearing on Climate Change Research	February 26, 2019 Tuesday	International	CQ Transcriptions	News								House Appropriations Subcommittee on Commerce, Justice and Science Holds Hearing on Climate Change Research	House Appropriations Subcommittee on Commerce, Justice and Science Holds Hearing on Climate Change Research	CQ Transcriptions		House Appropriations Subcommittee on Commerce, Justice and Science Holds Hearing on Climate Change Research	February 26, 2019 Tuesday	International	CQ Transcriptions	News								House Appropriations Subcommittee on Commerce, Justice and Science Holds Hearing on Climate Change Research	House Appropriations Subcommittee on Commerce, Justice and Science Holds Hearing on Climate Change Research	CQ Transcriptions		House Appropriations Subcommittee on Commerce, Justice and Science Holds Hearing on Climate Change Research	February 26, 2019 Tuesday
House Education and Labor Committee Holds Hearing on HHS Policies and Priorities	June 16, 2021 Wednesday	International	CQ Transcriptions	News								House Education and Labor Committee Holds Hearing on HHS Policies and Priorities	House Education and Labor Committee Holds Hearing on HHS Policies and Priorities	CQ Transcriptions		House Education and Labor Committee Holds Hearing on HHS Policies and Priorities	June 16, 2021 Wednesday	International	CQ Transcriptions	News								House Education and Labor Committee Holds Hearing on HHS Policies and Priorities	House Education and Labor Committee Holds Hearing on HHS Policies and Priorities	CQ Transcriptions		House Education and Labor Committee Holds Hearing on HHS Policies and Priorities	June 16, 2021 Wednesday	International	CQ Transcriptions	News								House Education and Labor Committee Holds Hearing on HHS Policies and Priorities	House Education and Labor Committee Holds Hearing on HHS Policies and Priorities	CQ Transcriptions		House Education and Labor Committee Holds Hearing on HHS Policies and Priorities	June 16, 2021 Wednesday
Senate Armed Services Committee Holds Hearing on The Nomination of Mark Esper to be Defense Secretary	July 16, 2019 Tuesday	International	CQ Transcriptions	News								Senate Armed Services Committee Holds Hearing on The Nomination of Mark Esper to be Defense Secretary	Senate Armed Services Committee Holds Hearing on The Nomination of Mark Esper to be Defense Secretary	CQ Transcriptions		Senate Armed Services Committee Holds Hearing on The Nomination of Mark Esper to be Defense Secretary	July 16, 2019 Tuesday	International	CQ Transcriptions	News								Senate Armed Services Committee Holds Hearing on The Nomination of Mark Esper to be Defense Secretary	Senate Armed Services Committee Holds Hearing on The Nomination of Mark Esper to be Defense Secretary	CQ Transcriptions		Senate Armed Services Committee Holds Hearing on The Nomination of Mark Esper to be Defense Secretary	July 16, 2019 Tuesday	International	CQ Transcriptions	News								Senate Armed Services Committee Holds Hearing on The Nomination of Mark Esper to be Defense Secretary	Senate Armed Services Committee Holds Hearing on The Nomination of Mark Esper to be Defense Secretary	CQ Transcriptions		Senate Armed Services Committee Holds Hearing on The Nomination of Mark Esper to be Defense Secretary	July 16, 2019 Tuesday
House Financial Services Subcommittee on Investor Protection, Entrepreneurship and Capital Markets Holds Hearing on Bond Rating Agencies	July 21, 2021 Wednesday	International	CQ Transcriptions	News								House Financial Services Subcommittee on Investor Protection, Entrepreneurship and Capital Markets Holds Hearing on Bond Rating Agencies	House Financial Services Subcommittee on Investor Protection, Entrepreneurship and Capital Markets Holds Hearing on Bond Rating Agencies	CQ Transcriptions		House Financial Services Subcommittee on Investor Protection, Entrepreneurship and Capital Markets Holds Hearing on Bond Rating Agencies	July 21, 2021 Wednesday	International	CQ Transcriptions	News								House Financial Services Subcommittee on Investor Protection, Entrepreneurship and Capital Markets Holds Hearing on Bond Rating Agencies	House Financial Services Subcommittee on Investor Protection, Entrepreneurship and Capital Markets Holds Hearing on Bond Rating Agencies	CQ Transcriptions		House Financial Services Subcommittee on Investor Protection, Entrepreneurship and Capital Markets Holds Hearing on Bond Rating Agencies	July 21, 2021 Wednesday	International	CQ Transcriptions	News								House Financial Services Subcommittee on Investor Protection, Entrepreneurship and Capital Markets Holds Hearing on Bond Rating Agencies	House Financial Services Subcommittee on Investor Protection, Entrepreneurship and Capital Markets Holds Hearing on Bond Rating Agencies	CQ Transcriptions		House Financial Services Subcommittee on Investor Protection, Entrepreneurship and Capital Markets Holds Hearing on Bond Rating Agencies	July 21, 2021 Wednesday
Senate Judiciary Committee Holds Hearing on Pending Nominations	December 1, 2021 Wednesday	International	CQ Transcriptions	News								Senate Judiciary Committee Holds Hearing on Pending Nominations	Senate Judiciary Committee Holds Hearing on Pending Nominations	CQ Transcriptions		Senate Judiciary Committee Holds Hearing on Pending Nominations	December 1, 2021 Wednesday	International	CQ Transcriptions	News								Senate Judiciary Committee Holds Hearing on Pending Nominations	Senate Judiciary Committee Holds Hearing on Pending Nominations	CQ Transcriptions		Senate Judiciary Committee Holds Hearing on Pending Nominations	December 1, 2021 Wednesday	International	CQ Transcriptions	News								Senate Judiciary Committee Holds Hearing on Pending Nominations	Senate Judiciary Committee Holds Hearing on Pending Nominations	CQ Transcriptions		Senate Judiciary Committee Holds Hearing on Pending Nominations	December 1, 2021 Wednesday
House Appropriations Subcommittee on Transportation and Housing and Urban Development Holds Hearing on Fiscal 2021 Budget Request for the Department of Transportation	February 27, 2020 Thursday	International	CQ Transcriptions	News								House Appropriations Subcommittee on Transportation and Housing and Urban Development Holds Hearing on Fiscal 2021 Budget Request for the Department of Transportation	House Appropriations Subcommittee on Transportation and Housing and Urban Development Holds Hearing on Fiscal 2021 Budget Request for the Department of Transportation	CQ Transcriptions		House Appropriations Subcommittee on Transportation and Housing and Urban Development Holds Hearing on Fiscal 2021 Budget Request for the Department of Transportation	February 27, 2020 Thursday	International	CQ Transcriptions	News								House Appropriations Subcommittee on Transportation and Housing and Urban Development Holds Hearing on Fiscal 2021 Budget Request for the Department of Transportation	House Appropriations Subcommittee on Transportation and Housing and Urban Development Holds Hearing on Fiscal 2021 Budget Request for the Department of Transportation	CQ Transcriptions		House Appropriations Subcommittee on Transportation and Housing and Urban Development Holds Hearing on Fiscal 2021 Budget Request for the Department of Transportation	February 27, 2020 Thursday	International	CQ Transcriptions	News								House Appropriations Subcommittee on Transportation and Housing and Urban Development Holds Hearing on Fiscal 2021 Budget Request for the Department of Transportation	House Appropriations Subcommittee on Transportation and Housing and Urban Development Holds Hearing on Fiscal 2021 Budget Request for the Department of Transportation	CQ Transcriptions		House Appropriations Subcommittee on Transportation and Housing and Urban Development Holds Hearing on Fiscal 2021 Budget Request for the Department of Transportation	February 27, 2020 Thursday
House Appropriations Committee Holds Markup on Fiscal 2022 Homeland Security and Defense Appropriations	July 13, 2021 Tuesday	International	CQ Transcriptions	News								House Appropriations Committee Holds Markup on Fiscal 2022 Homeland Security and Defense Appropriations	House Appropriations Committee Holds Markup on Fiscal 2022 Homeland Security and Defense Appropriations	CQ Transcriptions		House Appropriations Committee Holds Markup on Fiscal 2022 Homeland Security and Defense Appropriations	July 13, 2021 Tuesday	International	CQ Transcriptions	News								House Appropriations Committee Holds Markup on Fiscal 2022 Homeland Security and Defense Appropriations	House Appropriations Committee Holds Markup on Fiscal 2022 Homeland Security and Defense Appropriations	CQ Transcriptions		House Appropriations Committee Holds Markup on Fiscal 2022 Homeland Security and Defense Appropriations	July 13, 2021 Tuesday	International	CQ Transcriptions	News								House Appropriations Committee Holds Markup on Fiscal 2022 Homeland Security and Defense Appropriations	House Appropriations Committee Holds Markup on Fiscal 2022 Homeland Security and Defense Appropriations	CQ Transcriptions		House Appropriations Committee Holds Markup on Fiscal 2022 Homeland Security and Defense Appropriations	July 13, 2021 Tuesday
Atlantic Council Holds Discussion on US Interests in Ukraine , Part One	December 4, 2019 Wednesday	International	CQ Transcriptions	News								Atlantic Council Holds Discussion on US Interests in Ukraine , Part One	Atlantic Council Holds Discussion on US Interests in Ukraine , Part One	CQ Transcriptions		Atlantic Council Holds Discussion on US Interests in Ukraine , Part One	December 4, 2019 Wednesday	International	CQ Transcriptions	News								Atlantic Council Holds Discussion on US Interests in Ukraine , Part One	Atlantic Council Holds Discussion on US Interests in Ukraine , Part One	CQ Transcriptions		Atlantic Council Holds Discussion on US Interests in Ukraine , Part One	December 4, 2019 Wednesday	International	CQ Transcriptions	News								Atlantic Council Holds Discussion on US Interests in Ukraine , Part One	Atlantic Council Holds Discussion on US Interests in Ukraine , Part One	CQ Transcriptions		Atlantic Council Holds Discussion on US Interests in Ukraine , Part One	December 4, 2019 Wednesday
House Transportation and Infrastructure Subcommittee on Highways and Transit Holds Hearing on Automated Commercial Motor Vehicles	September 13, 2023 Wednesday	International	CQ Transcriptions	News								House Transportation and Infrastructure Subcommittee on Highways and Transit Holds Hearing on Automated Commercial Motor Vehicles	House Transportation and Infrastructure Subcommittee on Highways and Transit Holds Hearing on Automated Commercial Motor Vehicles	CQ Transcriptions		House Transportation and Infrastructure Subcommittee on Highways and Transit Holds Hearing on Automated Commercial Motor Vehicles	September 13, 2023 Wednesday	International	CQ Transcriptions	News								House Transportation and Infrastructure Subcommittee on Highways and Transit Holds Hearing on Automated Commercial Motor Vehicles	House Transportation and Infrastructure Subcommittee on Highways and Transit Holds Hearing on Automated Commercial Motor Vehicles	CQ Transcriptions		House Transportation and Infrastructure Subcommittee on Highways and Transit Holds Hearing on Automated Commercial Motor Vehicles	September 13, 2023 Wednesday	International	CQ Transcriptions	News								House Transportation and Infrastructure Subcommittee on Highways and Transit Holds Hearing on Automated Commercial Motor Vehicles	House Transportation and Infrastructure Subcommittee on Highways and Transit Holds Hearing on Automated Commercial Motor Vehicles	CQ Transcriptions		House Transportation and Infrastructure Subcommittee on Highways and Transit Holds Hearing on Automated Commercial Motor Vehicles	September 13, 2023 Wednesday
House Financial Services Subcommittee on Oversight and Investigations Holds Hearing on CDBF Disaster Recovery	July 15, 2021 Thursday	International	CQ Transcriptions	News								House Financial Services Subcommittee on Oversight and Investigations Holds Hearing on CDBF Disaster Recovery	House Financial Services Subcommittee on Oversight and Investigations Holds Hearing on CDBF Disaster Recovery	CQ Transcriptions		House Financial Services Subcommittee on Oversight and Investigations Holds Hearing on CDBF Disaster Recovery	July 15, 2021 Thursday	International	CQ Transcriptions	News								House Financial Services Subcommittee on Oversight and Investigations Holds Hearing on CDBF Disaster Recovery	House Financial Services Subcommittee on Oversight and Investigations Holds Hearing on CDBF Disaster Recovery	CQ Transcriptions		House Financial Services Subcommittee on Oversight and Investigations Holds Hearing on CDBF Disaster Recovery	July 15, 2021 Thursday	International	CQ Transcriptions	News								House Financial Services Subcommittee on Oversight and Investigations Holds Hearing on CDBF Disaster Recovery	House Financial Services Subcommittee on Oversight and Investigations Holds Hearing on CDBF Disaster Recovery	CQ Transcriptions		House Financial Services Subcommittee on Oversight and Investigations Holds Hearing on CDBF Disaster Recovery	July 15, 2021 Thursday
House Armed Services Committee Holds Markup on the National Defense Authorization Act for Fiscal 2024, Part I	June 21, 2023 Wednesday	International	CQ Transcriptions	News								House Armed Services Committee Holds Markup on the National Defense Authorization Act for Fiscal 2024, Part I	House Armed Services Committee Holds Markup on the National Defense Authorization Act for Fiscal 2024, Part I	CQ Transcriptions		House Armed Services Committee Holds Markup on the National Defense Authorization Act for Fiscal 2024, Part I	June 21, 2023 Wednesday	International	CQ Transcriptions	News								House Armed Services Committee Holds Markup on the National Defense Authorization Act for Fiscal 2024, Part I	House Armed Services Committee Holds Markup on the National Defense Authorization Act for Fiscal 2024, Part I	CQ Transcriptions		House Armed Services Committee Holds Markup on the National Defense Authorization Act for Fiscal 2024, Part I	June 21, 2023 Wednesday	International	CQ Transcriptions	News								House Armed Services Committee Holds Markup on the National Defense Authorization Act for Fiscal 2024, Part I	House Armed Services Committee Holds Markup on the National Defense Authorization Act for Fiscal 2024, Part I	CQ Transcriptions		House Armed Services Committee Holds Markup on the National Defense Authorization Act for Fiscal 2024, Part I	June 21, 2023 Wednesday
House Armed Services Committee Holds Hearing on Fiscal 2020 Defense Authorization	March 26, 2019 Tuesday	International	CQ Transcriptions	News								House Armed Services Committee Holds Hearing on Fiscal 2020 Defense Authorization	House Armed Services Committee Holds Hearing on Fiscal 2020 Defense Authorization	CQ Transcriptions		House Armed Services Committee Holds Hearing on Fiscal 2020 Defense Authorization	March 26, 2019 Tuesday	International	CQ Transcriptions	News								House Armed Services Committee Holds Hearing on Fiscal 2020 Defense Authorization	House Armed Services Committee Holds Hearing on Fiscal 2020 Defense Authorization	CQ Transcriptions		House Armed Services Committee Holds Hearing on Fiscal 2020 Defense Authorization	March 26, 2019 Tuesday	International	CQ Transcriptions	News								House Armed Services Committee Holds Hearing on Fiscal 2020 Defense Authorization	House Armed Services Committee Holds Hearing on Fiscal 2020 Defense Authorization	CQ Transcriptions		House Armed Services Committee Holds Hearing on Fiscal 2020 Defense Authorization	March 26, 2019 Tuesday
Senate Indian Affairs Holds Hearing on the 1866 Reconstruction Treaties	July 27, 2022 Wednesday	International	CQ Transcriptions	News								Senate Indian Affairs Holds Hearing on the 1866 Reconstruction Treaties	Senate Indian Affairs Holds Hearing on the 1866 Reconstruction Treaties	CQ Transcriptions		Senate Indian Affairs Holds Hearing on the 1866 Reconstruction Treaties	July 27, 2022 Wednesday	International	CQ Transcriptions	News								Senate Indian Affairs Holds Hearing on the 1866 Reconstruction Treaties	Senate Indian Affairs Holds Hearing on the 1866 Reconstruction Treaties	CQ Transcriptions		Senate Indian Affairs Holds Hearing on the 1866 Reconstruction Treaties	July 27, 2022 Wednesday	International	CQ Transcriptions	News								Senate Indian Affairs Holds Hearing on the 1866 Reconstruction Treaties	Senate Indian Affairs Holds Hearing on the 1866 Reconstruction Treaties	CQ Transcriptions		Senate Indian Affairs Holds Hearing on the 1866 Reconstruction Treaties	July 27, 2022 Wednesday
Senate Judiciary Committee Holds Hearing on Pending Nominations	June 9, 2021 Wednesday	International	CQ Transcriptions	News								Senate Judiciary Committee Holds Hearing on Pending Nominations	Senate Judiciary Committee Holds Hearing on Pending Nominations	CQ Transcriptions		Senate Judiciary Committee Holds Hearing on Pending Nominations	June 9, 2021 Wednesday	International	CQ Transcriptions	News								Senate Judiciary Committee Holds Hearing on Pending Nominations	Senate Judiciary Committee Holds Hearing on Pending Nominations	CQ Transcriptions		Senate Judiciary Committee Holds Hearing on Pending Nominations	June 9, 2021 Wednesday	International	CQ Transcriptions	News								Senate Judiciary Committee Holds Hearing on Pending Nominations	Senate Judiciary Committee Holds Hearing on Pending Nominations	CQ Transcriptions		Senate Judiciary Committee Holds Hearing on Pending Nominations	June 9, 2021 Wednesday
Senate Armed Services Subcommittee on Seapower Holds Hearing on Navy and Marine Corps Investment Programs	June 8, 2021 Tuesday	International	CQ Transcriptions	News								Senate Armed Services Subcommittee on Seapower Holds Hearing on Navy and Marine Corps Investment Programs	Senate Armed Services Subcommittee on Seapower Holds Hearing on Navy and Marine Corps Investment Programs	CQ Transcriptions		Senate Armed Services Subcommittee on Seapower Holds Hearing on Navy and Marine Corps Investment Programs	June 8, 2021 Tuesday	International	CQ Transcriptions	News								Senate Armed Services Subcommittee on Seapower Holds Hearing on Navy and Marine Corps Investment Programs	Senate Armed Services Subcommittee on Seapower Holds Hearing on Navy and Marine Corps Investment Programs	CQ Transcriptions		Senate Armed Services Subcommittee on Seapower Holds Hearing on Navy and Marine Corps Investment Programs	June 8, 2021 Tuesday	International	CQ Transcriptions	News								Senate Armed Services Subcommittee on Seapower Holds Hearing on Navy and Marine Corps Investment Programs	Senate Armed Services Subcommittee on Seapower Holds Hearing on Navy and Marine Corps Investment Programs	CQ Transcriptions		Senate Armed Services Subcommittee on Seapower Holds Hearing on Navy and Marine Corps Investment Programs	June 8, 2021 Tuesday
MSNBC Hosts 2019 Democratic Presidential Candidates Debate in Atlanta	November 20, 2019 Wednesday	International	CQ Transcriptions	News								MSNBC Hosts 2019 Democratic Presidential Candidates Debate in Atlanta	MSNBC Hosts 2019 Democratic Presidential Candidates Debate in Atlanta	CQ Transcriptions		MSNBC Hosts 2019 Democratic Presidential Candidates Debate in Atlanta	November 20, 2019 Wednesday	International	CQ Transcriptions	News								MSNBC Hosts 2019 Democratic Presidential Candidates Debate in Atlanta	MSNBC Hosts 2019 Democratic Presidential Candidates Debate in Atlanta	CQ Transcriptions		MSNBC Hosts 2019 Democratic Presidential Candidates Debate in Atlanta	November 20, 2019 Wednesday	International	CQ Transcriptions	News								MSNBC Hosts 2019 Democratic Presidential Candidates Debate in Atlanta	MSNBC Hosts 2019 Democratic Presidential Candidates Debate in Atlanta	CQ Transcriptions		MSNBC Hosts 2019 Democratic Presidential Candidates Debate in Atlanta	November 20, 2019 Wednesday
Senate Commerce, Science and Transportation Subcommittee on Security Holds Hearing on the Coast Guard and National Interests in the Arctic	December 8, 2020 Tuesday	International	CQ Transcriptions	News								Senate Commerce, Science and Transportation Subcommittee on Security Holds Hearing on the Coast Guard and National Interests in the Arctic	Senate Commerce, Science and Transportation Subcommittee on Security Holds Hearing on the Coast Guard and National Interests in the Arctic	CQ Transcriptions		Senate Commerce, Science and Transportation Subcommittee on Security Holds Hearing on the Coast Guard and National Interests in the Arctic	December 8, 2020 Tuesday	International	CQ Transcriptions	News								Senate Commerce, Science and Transportation Subcommittee on Security Holds Hearing on the Coast Guard and National Interests in the Arctic	Senate Commerce, Science and Transportation Subcommittee on Security Holds Hearing on the Coast Guard and National Interests in the Arctic	CQ Transcriptions		Senate Commerce, Science and Transportation Subcommittee on Security Holds Hearing on the Coast Guard and National Interests in the Arctic	December 8, 2020 Tuesday	International	CQ Transcriptions	News								Senate Commerce, Science and Transportation Subcommittee on Security Holds Hearing on the Coast Guard and National Interests in the Arctic	Senate Commerce, Science and Transportation Subcommittee on Security Holds Hearing on the Coast Guard and National Interests in the Arctic	CQ Transcriptions		Senate Commerce, Science and Transportation Subcommittee on Security Holds Hearing on the Coast Guard and National Interests in the Arctic	December 8, 2020 Tuesday
Senate Health, Education, Labor and Pensions Committee Holds Hearing on Pending Nominations	September 13, 2022 Tuesday	International	CQ Transcriptions	News								Senate Health, Education, Labor and Pensions Committee Holds Hearing on Pending Nominations	Senate Health, Education, Labor and Pensions Committee Holds Hearing on Pending Nominations	CQ Transcriptions		Senate Health, Education, Labor and Pensions Committee Holds Hearing on Pending Nominations	September 13, 2022 Tuesday	International	CQ Transcriptions	News								Senate Health, Education, Labor and Pensions Committee Holds Hearing on Pending Nominations	Senate Health, Education, Labor and Pensions Committee Holds Hearing on Pending Nominations	CQ Transcriptions		Senate Health, Education, Labor and Pensions Committee Holds Hearing on Pending Nominations	September 13, 2022 Tuesday	International	CQ Transcriptions	News								Senate Health, Education, Labor and Pensions Committee Holds Hearing on Pending Nominations	Senate Health, Education, Labor and Pensions Committee Holds Hearing on Pending Nominations	CQ Transcriptions		Senate Health, Education, Labor and Pensions Committee Holds Hearing on Pending Nominations	September 13, 2022 Tuesday
House Judiciary Committee Holds Hearing on Justice Department Oversight	July 28, 2020 Tuesday	International	CQ Transcriptions	News								House Judiciary Committee Holds Hearing on Justice Department Oversight	House Judiciary Committee Holds Hearing on Justice Department Oversight	CQ Transcriptions		House Judiciary Committee Holds Hearing on Justice Department Oversight	July 28, 2020 Tuesday	International	CQ Transcriptions	News								House Judiciary Committee Holds Hearing on Justice Department Oversight	House Judiciary Committee Holds Hearing on Justice Department Oversight	CQ Transcriptions		House Judiciary Committee Holds Hearing on Justice Department Oversight	July 28, 2020 Tuesday	International	CQ Transcriptions	News								House Judiciary Committee Holds Hearing on Justice Department Oversight	House Judiciary Committee Holds Hearing on Justice Department Oversight	CQ Transcriptions		House Judiciary Committee Holds Hearing on Justice Department Oversight	July 28, 2020 Tuesday
Senate Appropriations Subcommittee on Financial Services and General Government Holds Hearing on Fiscal 2022 Budget Request for the Treasury Department	June 23, 2021 Wednesday	International	CQ Transcriptions	News								Senate Appropriations Subcommittee on Financial Services and General Government Holds Hearing on Fiscal 2022 Budget Request for the Treasury Department	Senate Appropriations Subcommittee on Financial Services and General Government Holds Hearing on Fiscal 2022 Budget Request for the Treasury Department	CQ Transcriptions		Senate Appropriations Subcommittee on Financial Services and General Government Holds Hearing on Fiscal 2022 Budget Request for the Treasury Department	June 23, 2021 Wednesday	International	CQ Transcriptions	News								Senate Appropriations Subcommittee on Financial Services and General Government Holds Hearing on Fiscal 2022 Budget Request for the Treasury Department	Senate Appropriations Subcommittee on Financial Services and General Government Holds Hearing on Fiscal 2022 Budget Request for the Treasury Department	CQ Transcriptions		Senate Appropriations Subcommittee on Financial Services and General Government Holds Hearing on Fiscal 2022 Budget Request for the Treasury Department	June 23, 2021 Wednesday	International	CQ Transcriptions	News								Senate Appropriations Subcommittee on Financial Services and General Government Holds Hearing on Fiscal 2022 Budget Request for the Treasury Department	Senate Appropriations Subcommittee on Financial Services and General Government Holds Hearing on Fiscal 2022 Budget Request for the Treasury Department	CQ Transcriptions		Senate Appropriations Subcommittee on Financial Services and General Government Holds Hearing on Fiscal 2022 Budget Request for the Treasury Department	June 23, 2021 Wednesday
House Oversight and Reform Subcommittee on National Security Holds Hearing on Pathway for Peace in Afghanistan	February 19, 2021 Friday	International	CQ Transcriptions	News								House Oversight and Reform Subcommittee on National Security Holds Hearing on Pathway for Peace in Afghanistan	House Oversight and Reform Subcommittee on National Security Holds Hearing on Pathway for Peace in Afghanistan	CQ Transcriptions		House Oversight and Reform Subcommittee on National Security Holds Hearing on Pathway for Peace in Afghanistan	February 19, 2021 Friday	International	CQ Transcriptions	News								House Oversight and Reform Subcommittee on National Security Holds Hearing on Pathway for Peace in Afghanistan	House Oversight and Reform Subcommittee on National Security Holds Hearing on Pathway for Peace in Afghanistan	CQ Transcriptions		House Oversight and Reform Subcommittee on National Security Holds Hearing on Pathway for Peace in Afghanistan	February 19, 2021 Friday	International	CQ Transcriptions	News								House Oversight and Reform Subcommittee on National Security Holds Hearing on Pathway for Peace in Afghanistan	House Oversight and Reform Subcommittee on National Security Holds Hearing on Pathway for Peace in Afghanistan	CQ Transcriptions		House Oversight and Reform Subcommittee on National Security Holds Hearing on Pathway for Peace in Afghanistan	February 19, 2021 Friday
Senate Armed Services Committee Holds Hearing on U.S. Strategic Command and U.S. Northern Command	February 26, 2019 Tuesday	International	CQ Transcriptions	News								Senate Armed Services Committee Holds Hearing on U.S. Strategic Command and U.S. Northern Command	Senate Armed Services Committee Holds Hearing on U.S. Strategic Command and U.S. Northern Command	CQ Transcriptions		Senate Armed Services Committee Holds Hearing on U.S. Strategic Command and U.S. Northern Command	February 26, 2019 Tuesday	International	CQ Transcriptions	News								Senate Armed Services Committee Holds Hearing on U.S. Strategic Command and U.S. Northern Command	Senate Armed Services Committee Holds Hearing on U.S. Strategic Command and U.S. Northern Command	CQ Transcriptions		Senate Armed Services Committee Holds Hearing on U.S. Strategic Command and U.S. Northern Command	February 26, 2019 Tuesday	International	CQ Transcriptions	News								Senate Armed Services Committee Holds Hearing on U.S. Strategic Command and U.S. Northern Command	Senate Armed Services Committee Holds Hearing on U.S. Strategic Command and U.S. Northern Command	CQ Transcriptions		Senate Armed Services Committee Holds Hearing on U.S. Strategic Command and U.S. Northern Command	February 26, 2019 Tuesday
House Judiciary Subcommittee on Antitrust, Commercial and Administrative Law Holds Hearing on Impacts of T-Mobile / Sprint Merger	March 12, 2019 Tuesday	International	CQ Transcriptions	News								House Judiciary Subcommittee on Antitrust, Commercial and Administrative Law Holds Hearing on Impacts of T-Mobile / Sprint Merger	House Judiciary Subcommittee on Antitrust, Commercial and Administrative Law Holds Hearing on Impacts of T-Mobile / Sprint Merger	CQ Transcriptions		House Judiciary Subcommittee on Antitrust, Commercial and Administrative Law Holds Hearing on Impacts of T-Mobile / Sprint Merger	March 12, 2019 Tuesday	International	CQ Transcriptions	News								House Judiciary Subcommittee on Antitrust, Commercial and Administrative Law Holds Hearing on Impacts of T-Mobile / Sprint Merger	House Judiciary Subcommittee on Antitrust, Commercial and Administrative Law Holds Hearing on Impacts of T-Mobile / Sprint Merger	CQ Transcriptions		House Judiciary Subcommittee on Antitrust, Commercial and Administrative Law Holds Hearing on Impacts of T-Mobile / Sprint Merger	March 12, 2019 Tuesday	International	CQ Transcriptions	News								House Judiciary Subcommittee on Antitrust, Commercial and Administrative Law Holds Hearing on Impacts of T-Mobile / Sprint Merger	House Judiciary Subcommittee on Antitrust, Commercial and Administrative Law Holds Hearing on Impacts of T-Mobile / Sprint Merger	CQ Transcriptions		House Judiciary Subcommittee on Antitrust, Commercial and Administrative Law Holds Hearing on Impacts of T-Mobile / Sprint Merger	March 12, 2019 Tuesday
House Homeland Security Subcommittee on Border Security, Facilitation and Operations Holds Hearing on ICE Contractors' New Coronavirus Response	July 13, 2020 Monday	International	CQ Transcriptions	News								House Homeland Security Subcommittee on Border Security, Facilitation and Operations Holds Hearing on ICE Contractors' New Coronavirus Response	House Homeland Security Subcommittee on Border Security, Facilitation and Operations Holds Hearing on ICE Contractors' New Coronavirus Response	CQ Transcriptions		House Homeland Security Subcommittee on Border Security, Facilitation and Operations Holds Hearing on ICE Contractors' New Coronavirus Response	July 13, 2020 Monday	International	CQ Transcriptions	News								House Homeland Security Subcommittee on Border Security, Facilitation and Operations Holds Hearing on ICE Contractors' New Coronavirus Response	House Homeland Security Subcommittee on Border Security, Facilitation and Operations Holds Hearing on ICE Contractors' New Coronavirus Response	CQ Transcriptions		House Homeland Security Subcommittee on Border Security, Facilitation and Operations Holds Hearing on ICE Contractors' New Coronavirus Response	July 13, 2020 Monday	International	CQ Transcriptions	News								House Homeland Security Subcommittee on Border Security, Facilitation and Operations Holds Hearing on ICE Contractors' New Coronavirus Response	House Homeland Security Subcommittee on Border Security, Facilitation and Operations Holds Hearing on ICE Contractors' New Coronavirus Response	CQ Transcriptions		House Homeland Security Subcommittee on Border Security, Facilitation and Operations Holds Hearing on ICE Contractors' New Coronavirus Response	July 13, 2020 Monday
House Appropriations Subcommittee on Homeland Security Holds Hearing on the Fiscal Year 2023 Coast Guard Budget Request	May 12, 2022 Thursday	International	CQ Transcriptions	News								House Appropriations Subcommittee on Homeland Security Holds Hearing on the Fiscal Year 2023 Coast Guard Budget Request	House Appropriations Subcommittee on Homeland Security Holds Hearing on the Fiscal Year 2023 Coast Guard Budget Request	CQ Transcriptions		House Appropriations Subcommittee on Homeland Security Holds Hearing on the Fiscal Year 2023 Coast Guard Budget Request	May 12, 2022 Thursday	International	CQ Transcriptions	News								House Appropriations Subcommittee on Homeland Security Holds Hearing on the Fiscal Year 2023 Coast Guard Budget Request	House Appropriations Subcommittee on Homeland Security Holds Hearing on the Fiscal Year 2023 Coast Guard Budget Request	CQ Transcriptions		House Appropriations Subcommittee on Homeland Security Holds Hearing on the Fiscal Year 2023 Coast Guard Budget Request	May 12, 2022 Thursday	International	CQ Transcriptions	News								House Appropriations Subcommittee on Homeland Security Holds Hearing on the Fiscal Year 2023 Coast Guard Budget Request	House Appropriations Subcommittee on Homeland Security Holds Hearing on the Fiscal Year 2023 Coast Guard Budget Request	CQ Transcriptions		House Appropriations Subcommittee on Homeland Security Holds Hearing on the Fiscal Year 2023 Coast Guard Budget Request	May 12, 2022 Thursday
House Foreign Affairs Subcommittee on Middle East, North Africa and International Terrorism Holds Hearing on Idlib , Syria	March 11, 2020 Wednesday	International	CQ Transcriptions	News								House Foreign Affairs Subcommittee on Middle East, North Africa and International Terrorism Holds Hearing on Idlib , Syria	House Foreign Affairs Subcommittee on Middle East, North Africa and International Terrorism Holds Hearing on Idlib , Syria	CQ Transcriptions		House Foreign Affairs Subcommittee on Middle East, North Africa and International Terrorism Holds Hearing on Idlib , Syria	March 11, 2020 Wednesday	International	CQ Transcriptions	News								House Foreign Affairs Subcommittee on Middle East, North Africa and International Terrorism Holds Hearing on Idlib , Syria	House Foreign Affairs Subcommittee on Middle East, North Africa and International Terrorism Holds Hearing on Idlib , Syria	CQ Transcriptions		House Foreign Affairs Subcommittee on Middle East, North Africa and International Terrorism Holds Hearing on Idlib , Syria	March 11, 2020 Wednesday	International	CQ Transcriptions	News								House Foreign Affairs Subcommittee on Middle East, North Africa and International Terrorism Holds Hearing on Idlib , Syria	House Foreign Affairs Subcommittee on Middle East, North Africa and International Terrorism Holds Hearing on Idlib , Syria	CQ Transcriptions		House Foreign Affairs Subcommittee on Middle East, North Africa and International Terrorism Holds Hearing on Idlib , Syria	March 11, 2020 Wednesday
Senate Judiciary Subcommittee on Competition Policy, Antitrust and Consumer Rights Holds Hearing on Examining Competition in App Stores	April 21, 2021 Wednesday	International	CQ Transcriptions	News								Senate Judiciary Subcommittee on Competition Policy, Antitrust and Consumer Rights Holds Hearing on Examining Competition in App Stores	Senate Judiciary Subcommittee on Competition Policy, Antitrust and Consumer Rights Holds Hearing on Examining Competition in App Stores	CQ Transcriptions		Senate Judiciary Subcommittee on Competition Policy, Antitrust and Consumer Rights Holds Hearing on Examining Competition in App Stores	April 21, 2021 Wednesday	International	CQ Transcriptions	News								Senate Judiciary Subcommittee on Competition Policy, Antitrust and Consumer Rights Holds Hearing on Examining Competition in App Stores	Senate Judiciary Subcommittee on Competition Policy, Antitrust and Consumer Rights Holds Hearing on Examining Competition in App Stores	CQ Transcriptions		Senate Judiciary Subcommittee on Competition Policy, Antitrust and Consumer Rights Holds Hearing on Examining Competition in App Stores	April 21, 2021 Wednesday	International	CQ Transcriptions	News								Senate Judiciary Subcommittee on Competition Policy, Antitrust and Consumer Rights Holds Hearing on Examining Competition in App Stores	Senate Judiciary Subcommittee on Competition Policy, Antitrust and Consumer Rights Holds Hearing on Examining Competition in App Stores	CQ Transcriptions		Senate Judiciary Subcommittee on Competition Policy, Antitrust and Consumer Rights Holds Hearing on Examining Competition in App Stores	April 21, 2021 Wednesday
House Armed Services Committee Holds Markup on Fiscal 2020 National Defense Authorization Act	June 12, 2019 Wednesday	International	CQ Transcriptions	News								House Armed Services Committee Holds Markup on Fiscal 2020 National Defense Authorization Act	House Armed Services Committee Holds Markup on Fiscal 2020 National Defense Authorization Act	CQ Transcriptions		House Armed Services Committee Holds Markup on Fiscal 2020 National Defense Authorization Act	June 12, 2019 Wednesday	International	CQ Transcriptions	News								House Armed Services Committee Holds Markup on Fiscal 2020 National Defense Authorization Act	House Armed Services Committee Holds Markup on Fiscal 2020 National Defense Authorization Act	CQ Transcriptions		House Armed Services Committee Holds Markup on Fiscal 2020 National Defense Authorization Act	June 12, 2019 Wednesday	International	CQ Transcriptions	News								House Armed Services Committee Holds Markup on Fiscal 2020 National Defense Authorization Act	House Armed Services Committee Holds Markup on Fiscal 2020 National Defense Authorization Act	CQ Transcriptions		House Armed Services Committee Holds Markup on Fiscal 2020 National Defense Authorization Act	June 12, 2019 Wednesday
House Armed Services Committee Holds Markup on Fiscal 2020 National Defense Authorization Act	June 12, 2019 Wednesday	International	CQ Transcriptions	News								House Armed Services Committee Holds Markup on Fiscal 2020 National Defense Authorization Act	House Armed Services Committee Holds Markup on Fiscal 2020 National Defense Authorization Act	CQ Transcriptions		House Armed Services Committee Holds Markup on Fiscal 2020 National Defense Authorization Act	June 12, 2019 Wednesday	International	CQ Transcriptions	News								House Armed Services Committee Holds Markup on Fiscal 2020 National Defense Authorization Act	House Armed Services Committee Holds Markup on Fiscal 2020 National Defense Authorization Act	CQ Transcriptions		House Armed Services Committee Holds Markup on Fiscal 2020 National Defense Authorization Act	June 12, 2019 Wednesday	International	CQ Transcriptions	News								House Armed Services Committee Holds Markup on Fiscal 2020 National Defense Authorization Act	House Armed Services Committee Holds Markup on Fiscal 2020 National Defense Authorization Act	CQ Transcriptions		House Armed Services Committee Holds Markup on Fiscal 2020 National Defense Authorization Act	June 12, 2019 Wednesday
House Armed Services Committee Holds Markup on Fiscal 2020 National Defense Authorization Act	June 12, 2019 Wednesday	International	CQ Transcriptions	News								House Armed Services Committee Holds Markup on Fiscal 2020 National Defense Authorization Act	House Armed Services Committee Holds Markup on Fiscal 2020 National Defense Authorization Act	CQ Transcriptions		House Armed Services Committee Holds Markup on Fiscal 2020 National Defense Authorization Act	June 12, 2019 Wednesday	International	CQ Transcriptions	News								House Armed Services Committee Holds Markup on Fiscal 2020 National Defense Authorization Act	House Armed Services Committee Holds Markup on Fiscal 2020 National Defense Authorization Act	CQ Transcriptions		House Armed Services Committee Holds Markup on Fiscal 2020 National Defense Authorization Act	June 12, 2019 Wednesday	International	CQ Transcriptions	News								House Armed Services Committee Holds Markup on Fiscal 2020 National Defense Authorization Act	House Armed Services Committee Holds Markup on Fiscal 2020 National Defense Authorization Act	CQ Transcriptions		House Armed Services Committee Holds Markup on Fiscal 2020 National Defense Authorization Act	June 12, 2019 Wednesday
House Armed Services Committee Holds Markup on Fiscal 2020 National Defense Authorization Act	June 12, 2019 Wednesday	International	CQ Transcriptions	News								House Armed Services Committee Holds Markup on Fiscal 2020 National Defense Authorization Act	House Armed Services Committee Holds Markup on Fiscal 2020 National Defense Authorization Act	CQ Transcriptions		House Armed Services Committee Holds Markup on Fiscal 2020 National Defense Authorization Act	June 12, 2019 Wednesday	International	CQ Transcriptions	News								House Armed Services Committee Holds Markup on Fiscal 2020 National Defense Authorization Act	House Armed Services Committee Holds Markup on Fiscal 2020 National Defense Authorization Act	CQ Transcriptions		House Armed Services Committee Holds Markup on Fiscal 2020 National Defense Authorization Act	June 12, 2019 Wednesday	International	CQ Transcriptions	News								House Armed Services Committee Holds Markup on Fiscal 2020 National Defense Authorization Act	House Armed Services Committee Holds Markup on Fiscal 2020 National Defense Authorization Act	CQ Transcriptions		House Armed Services Committee Holds Markup on Fiscal 2020 National Defense Authorization Act	June 12, 2019 Wednesday
House Armed Services Committee Holds Markup on Fiscal 2020 National Defense Authorization Act	June 12, 2019 Wednesday	International	CQ Transcriptions	News								House Armed Services Committee Holds Markup on Fiscal 2020 National Defense Authorization Act	House Armed Services Committee Holds Markup on Fiscal 2020 National Defense Authorization Act	CQ Transcriptions		House Armed Services Committee Holds Markup on Fiscal 2020 National Defense Authorization Act	June 12, 2019 Wednesday	International	CQ Transcriptions	News								House Armed Services Committee Holds Markup on Fiscal 2020 National Defense Authorization Act	House Armed Services Committee Holds Markup on Fiscal 2020 National Defense Authorization Act	CQ Transcriptions		House Armed Services Committee Holds Markup on Fiscal 2020 National Defense Authorization Act	June 12, 2019 Wednesday	International	CQ Transcriptions	News								House Armed Services Committee Holds Markup on Fiscal 2020 National Defense Authorization Act	House Armed Services Committee Holds Markup on Fiscal 2020 National Defense Authorization Act	CQ Transcriptions		House Armed Services Committee Holds Markup on Fiscal 2020 National Defense Authorization Act	June 12, 2019 Wednesday
House Armed Services Committee Holds Markup on Fiscal 2020 National Defense Authorization Act	June 12, 2019 Wednesday	International	CQ Transcriptions	News								House Armed Services Committee Holds Markup on Fiscal 2020 National Defense Authorization Act	House Armed Services Committee Holds Markup on Fiscal 2020 National Defense Authorization Act	CQ Transcriptions		House Armed Services Committee Holds Markup on Fiscal 2020 National Defense Authorization Act	June 12, 2019 Wednesday	International	CQ Transcriptions	News								House Armed Services Committee Holds Markup on Fiscal 2020 National Defense Authorization Act	House Armed Services Committee Holds Markup on Fiscal 2020 National Defense Authorization Act	CQ Transcriptions		House Armed Services Committee Holds Markup on Fiscal 2020 National Defense Authorization Act	June 12, 2019 Wednesday	International	CQ Transcriptions	News								House Armed Services Committee Holds Markup on Fiscal 2020 National Defense Authorization Act	House Armed Services Committee Holds Markup on Fiscal 2020 National Defense Authorization Act	CQ Transcriptions		House Armed Services Committee Holds Markup on Fiscal 2020 National Defense Authorization Act	June 12, 2019 Wednesday
House Armed Services Committee Holds Markup on Fiscal 2020 National Defense Authorization Act	June 12, 2019 Wednesday	International	CQ Transcriptions	News								House Armed Services Committee Holds Markup on Fiscal 2020 National Defense Authorization Act	House Armed Services Committee Holds Markup on Fiscal 2020 National Defense Authorization Act	CQ Transcriptions		House Armed Services Committee Holds Markup on Fiscal 2020 National Defense Authorization Act	June 12, 2019 Wednesday	International	CQ Transcriptions	News								House Armed Services Committee Holds Markup on Fiscal 2020 National Defense Authorization Act	House Armed Services Committee Holds Markup on Fiscal 2020 National Defense Authorization Act	CQ Transcriptions		House Armed Services Committee Holds Markup on Fiscal 2020 National Defense Authorization Act	June 12, 2019 Wednesday	International	CQ Transcriptions	News								House Armed Services Committee Holds Markup on Fiscal 2020 National Defense Authorization Act	House Armed Services Committee Holds Markup on Fiscal 2020 National Defense Authorization Act	CQ Transcriptions		House Armed Services Committee Holds Markup on Fiscal 2020 National Defense Authorization Act	June 12, 2019 Wednesday
House Foreign Affairs Committee Holds Hearing on Doha Agreement Enforcement	February 15, 2024 Thursday	International	CQ Transcriptions	News								House Foreign Affairs Committee Holds Hearing on Doha Agreement Enforcement	House Foreign Affairs Committee Holds Hearing on Doha Agreement Enforcement	CQ Transcriptions		House Foreign Affairs Committee Holds Hearing on Doha Agreement Enforcement	February 15, 2024 Thursday	International	CQ Transcriptions	News								House Foreign Affairs Committee Holds Hearing on Doha Agreement Enforcement	House Foreign Affairs Committee Holds Hearing on Doha Agreement Enforcement	CQ Transcriptions		House Foreign Affairs Committee Holds Hearing on Doha Agreement Enforcement	February 15, 2024 Thursday	International	CQ Transcriptions	News								House Foreign Affairs Committee Holds Hearing on Doha Agreement Enforcement	House Foreign Affairs Committee Holds Hearing on Doha Agreement Enforcement	CQ Transcriptions		House Foreign Affairs Committee Holds Hearing on Doha Agreement Enforcement	February 15, 2024 Thursday
House Financial Services Committee Holds Hearing on Practices of Private Funds	November 19, 2019 Tuesday	International	CQ Transcriptions	News								House Financial Services Committee Holds Hearing on Practices of Private Funds	House Financial Services Committee Holds Hearing on Practices of Private Funds	CQ Transcriptions		House Financial Services Committee Holds Hearing on Practices of Private Funds	November 19, 2019 Tuesday	International	CQ Transcriptions	News								House Financial Services Committee Holds Hearing on Practices of Private Funds	House Financial Services Committee Holds Hearing on Practices of Private Funds	CQ Transcriptions		House Financial Services Committee Holds Hearing on Practices of Private Funds	November 19, 2019 Tuesday	International	CQ Transcriptions	News								House Financial Services Committee Holds Hearing on Practices of Private Funds	House Financial Services Committee Holds Hearing on Practices of Private Funds	CQ Transcriptions		House Financial Services Committee Holds Hearing on Practices of Private Funds	November 19, 2019 Tuesday
House Energy and Commerce Subcommittee on Energy Holds Hearing on Clean Energy Legislation	March 24, 2021 Wednesday	International	CQ Transcriptions	News								House Energy and Commerce Subcommittee on Energy Holds Hearing on Clean Energy Legislation	House Energy and Commerce Subcommittee on Energy Holds Hearing on Clean Energy Legislation	CQ Transcriptions		House Energy and Commerce Subcommittee on Energy Holds Hearing on Clean Energy Legislation	March 24, 2021 Wednesday	International	CQ Transcriptions	News								House Energy and Commerce Subcommittee on Energy Holds Hearing on Clean Energy Legislation	House Energy and Commerce Subcommittee on Energy Holds Hearing on Clean Energy Legislation	CQ Transcriptions		House Energy and Commerce Subcommittee on Energy Holds Hearing on Clean Energy Legislation	March 24, 2021 Wednesday	International	CQ Transcriptions	News								House Energy and Commerce Subcommittee on Energy Holds Hearing on Clean Energy Legislation	House Energy and Commerce Subcommittee on Energy Holds Hearing on Clean Energy Legislation	CQ Transcriptions		House Energy and Commerce Subcommittee on Energy Holds Hearing on Clean Energy Legislation	March 24, 2021 Wednesday
Hudson Institute Holds Webinar on Foreign Assistance and Religious Freedom	October 27, 2020 Tuesday	International	CQ Transcriptions	News								Hudson Institute Holds Webinar on Foreign Assistance and Religious Freedom	Hudson Institute Holds Webinar on Foreign Assistance and Religious Freedom	CQ Transcriptions		Hudson Institute Holds Webinar on Foreign Assistance and Religious Freedom	October 27, 2020 Tuesday	International	CQ Transcriptions	News								Hudson Institute Holds Webinar on Foreign Assistance and Religious Freedom	Hudson Institute Holds Webinar on Foreign Assistance and Religious Freedom	CQ Transcriptions		Hudson Institute Holds Webinar on Foreign Assistance and Religious Freedom	October 27, 2020 Tuesday	International	CQ Transcriptions	News								Hudson Institute Holds Webinar on Foreign Assistance and Religious Freedom	Hudson Institute Holds Webinar on Foreign Assistance and Religious Freedom	CQ Transcriptions		Hudson Institute Holds Webinar on Foreign Assistance and Religious Freedom	October 27, 2020 Tuesday
[truncated: 238 more rows]
[truncated: 5,000 more columns]
